# Supplementary material for: Personal use of permanent hair dyes and cancer risk and mortality in US women: prospective cohort study
Source: PubMed Central journal article supplement — BMJ. 2020 Sep 2;370:m2942. doi: 10.1136/bmj.m2942 (PMC7463170; doi:10.1136/bmj.m2942), 2020-09-02
Supplement: zhay054407.ww.pdf [file zhay054407.ww.pdf]

## Supplementary Material

**Supplementary Table 1.** Age-adjusted and multivariable (MV)-adjusted hazard ratios (HR) and 95% confidence intervals (CI) of **overall cancer incidence** (n=22612) among women in the NHS according to personal use of permanent hair dyes and natural hair color, obtained from Cox models with updated covariate values

**Supplementary Table 2.** Age-adjusted and multivariable (MV)-adjusted hazard ratios (HR) and 95% confidence intervals (CI) of **overall solid cancer incidence** (n=20805) among women in the NHS according to personal use of permanent hair dyes and natural hair color, obtained from Cox models with updated covariate values

**Supplementary Table 3.** Age-adjusted and multivariable (MV)-adjusted hazard ratios (HR) and 95% confidence intervals (CI) of **basal cell carcinoma incidence** (n=22560) among women in the NHS according to personal use of permanent hair dyes and natural hair color, obtained from Cox models with updated covariate values

**Supplementary Table 4.** Age-adjusted and multivariable (MV)-adjusted hazard ratios (HR) and 95% confidence intervals (CI) of **cutaneous squamous cell carcinoma incidence** (n=2792) among women in the NHS according to personal use of permanent hair dyes and natural hair color, obtained from Cox models with updated covariate values

**Supplementary Table 5.** Age-adjusted and multivariable (MV)-adjusted hazard ratios (HR) and 95% confidence intervals (CI) of **melanoma incidence** (n=1198) among women in the NHS according to personal use of permanent hair dyes and natural hair color, obtained from Cox models with updated covariate values

**Supplementary Table 6.** Age-adjusted and multivariable (MV)-adjusted hazard ratios (HR) and 95% confidence intervals (CI) of **breast cancer incidence** (n=9252) among women in the NHS according to personal use of permanent hair dyes and natural hair color, obtained from Cox models with updated covariate values

**Supplementary Table 7.** Age-adjusted and multivariable (MV)-adjusted hazard ratios (HR) and 95% confidence intervals (CI) of **breast cancer incidence (ER+)** (n=5905) among women in the NHS according to personal use of permanent hair dyes and natural hair color, obtained from Cox models with updated covariate values

**Supplementary Table 8.** Age-adjusted and multivariable (MV)-adjusted hazard ratios (HR) and 95% confidence intervals (CI) of **breast cancer incidence (ER-)** (n=1521) among women in the NHS according to personal use of permanent hair dyes and natural hair color, obtained from Cox models with updated covariate values

**Supplementary Table 9.** Age-adjusted and multivariable (MV)-adjusted hazard ratios (HR) and 95% confidence intervals (CI) of **breast cancer incidence (PR+)** (n=4826) among women in the NHS according to personal use of permanent hair dyes and natural hair color, obtained from Cox models with updated covariate values

**Supplementary Table 10.** Age-adjusted and multivariable (MV)-adjusted hazard ratios (HR) and 95% confidence intervals (CI) of **breast cancer incidence (PR-)** (n=2379) among women in the NHS according to personal use of permanent hair dyes and natural hair color, obtained from Cox models with updated covariate values

**Supplementary Table 11.** Age-adjusted and multivariable (MV)-adjusted hazard ratios (HR) and 95% confidence intervals (CI) of **breast cancer incidence (ER+/PR+)** (n=4634) among women in the NHS according to personal use of permanent hair dyes and natural hair color, obtained from Cox models with updated covariate values

**Supplementary Table 12.** Age-adjusted and multivariable (MV)-adjusted hazard ratios (HR) and 95% confidence intervals (CI) of **breast cancer incidence (ER+/PR-)** (n=1086) among women in the NHS according to personal use of permanent hair dyes and natural hair color, obtained from Cox models with updated covariate values

**Supplementary Table 13.** Age-adjusted and multivariable (MV)-adjusted hazard ratios (HR) and 95% confidence intervals (CI) of **breast cancer incidence (ER-/PR-)** (n=1287) among women in the NHS according to personal use of permanent hair dyes and natural hair color, obtained from Cox models with updated covariate values

**Supplementary Table 14.** Age-adjusted and multivariable (MV)-adjusted hazard ratios (HR) and 95% confidence intervals (CI) of **ovarian cancer incidence** (n=1215) among women in the NHS according to personal use of permanent hair dyes and natural hair color, obtained from Cox models with updated covariate values

**Supplementary Table 15.** Age-adjusted and multivariable (MV)-adjusted hazard ratios (HR) and 95% confidence intervals (CI) of **colorectal cancer incidence** (n=2394) among women in the NHS according to personal use of permanent hair dyes and natural hair color, obtained from Cox models with updated covariate values

**Supplementary Table 16.** Age-adjusted and multivariable (MV)-adjusted hazard ratios (HR) and 95% confidence intervals (CI) of **bladder cancer incidence** (n=596) among women in the NHS according to personal use of permanent hair dyes and natural hair color, obtained from Cox models with updated covariate values

**Supplementary Table 17.** Age-adjusted and multivariable (MV)-adjusted hazard ratios (HR) and 95% confidence intervals (CI) of **kidney cancer incidence** (n=477) among women in the NHS according to personal use of permanent hair dyes and natural hair color, obtained from Cox models with updated covariate values

**Supplementary Table 18.** Age-adjusted and multivariable (MV)-adjusted hazard ratios (HR) and 95% confidence intervals (CI) of **lung cancer incidence** (n=2623) among women in the NHS according to personal use of permanent hair dyes and natural hair color, obtained from Cox models with updated covariate values

**Supplementary Table 19.** Age-adjusted and multivariable (MV)-adjusted hazard ratios (HR) and 95% confidence intervals (CI) of **brain cancer incidence** (n=277) among women in the NHS according to personal use of permanent hair dyes and natural hair color, obtained from Cox models with updated covariate values

**Supplementary Table 20.** Age-adjusted and multivariable (MV)-adjusted hazard ratios (HR) and 95% confidence intervals (CI) of **overall hematopoietic cancer incidence** (n=1807) among women in the NHS according to personal use of permanent hair dyes and natural hair color, obtained from Cox models with updated covariate values

**Supplementary Table 21.** Age-adjusted and multivariable (MV)-adjusted hazard ratios (HR) and 95% confidence intervals (CI) of **overall non-Hodgkin lymphoma incidence** (n=1277) among women in the NHS according to personal use of permanent hair dyes and natural hair color, obtained from Cox models with updated covariate values

**Supplementary Table 22.** Age-adjusted and multivariable (MV)-adjusted hazard ratios (HR) and 95% confidence intervals (CI) of **T-cell lymphoma incidence** (n=51) among women in the NHS according to personal use of permanent hair dyes and natural hair color, obtained from Cox models with updated covariate values

**Supplementary Table 23.** Age-adjusted and multivariable (MV)-adjusted hazard ratios (HR) and 95% confidence intervals (CI) of **diffuse large B-cell lymphoma incidence** (n=190) among women in the NHS according to personal use of permanent hair dyes and natural hair color, obtained from Cox models with updated covariate values

**Supplementary Table 24.** Age-adjusted and multivariable (MV)-adjusted hazard ratios (HR) and 95% confidence intervals (CI) of **follicular lymphoma incidence** (n=204) among women in the NHS according to personal use of permanent hair dyes and natural hair color, obtained from Cox models with updated covariate values

**Supplementary Table 25.** Age-adjusted and multivariable (MV)-adjusted hazard ratios (HR) and 95% confidence intervals (CI) of **chronic lymphocytic leukemia/small lymphocytic lymphoma incidence** (n=272) among women in the NHS according to personal use of permanent hair dyes and natural hair color, obtained from Cox models with updated covariate values

**Supplementary Table 26.** Age-adjusted and multivariable (MV)-adjusted hazard ratios (HR) and 95% confidence intervals (CI) of **Hodgkin lymphoma incidence** (n=70) among women in the NHS according to personal use of permanent hair dyes and natural hair color, obtained from Cox models with updated covariate values

**Supplementary Table 27.** Age-adjusted and multivariable (MV)-adjusted hazard ratios (HR) and 95% confidence intervals (CI) of **multiple myeloma incidence** (n=274) among women in the NHS according to personal use of permanent hair dyes and natural hair color, obtained from Cox models with updated covariate values

**Supplementary Table 28.** Age-adjusted and multivariable (MV)-adjusted hazard ratios (HR) and 95% confidence intervals (CI) of **myeloid leukemias incidence** (n=170) among women in the NHS according to personal use of permanent hair dyes and natural hair color, obtained from Cox models with updated covariate values

**Supplementary Table 29.** Age-adjusted and multivariable (MV)-adjusted hazard ratios (HR) and 95% confidence intervals (CI) of **cancer-related death** (n=4860) among women in the NHS according to personal use of permanent hair dyes and natural hair color, obtained from Cox models with updated covariate values

**Supplementary Table 30.** Age-adjusted and multivariable (MV)-adjusted hazard ratios (HR) and 95% confidence intervals (CI) of **overall cancer incidence** among women in the NHS according to status of personal use of permanent hair dyes and natural hair color, obtained from Cox models with updated covariate values (assuming a latency of 6, 10, 16 and 20 years)

**Supplementary Table 31.** Age-adjusted and multivariable (MV)-adjusted hazard ratios (HR) and 95% confidence intervals (CI) of **overall cancer incidence** among women in the NHS according to cumulative dose of permanent hair dye use <sup>a</sup> and natural hair color, obtained from Cox models with updated covariate values (assuming a latency of 6, 10, 16 and 20 years)

**Supplementary Table 32.** Age-adjusted and multivariable (MV)-adjusted hazard ratios (HR) and 95% confidence intervals (CI) of **basal cell carcinoma incidence** among women in the NHS according to status of personal use of permanent hair dyes and natural hair color, obtained from Cox models with updated covariate values (assuming a latency of 6, 10, 16 and 20 years)

**Supplementary Table 33.** Age-adjusted and multivariable (MV)-adjusted hazard ratios (HR) and 95% confidence intervals (CI) of **basal cell carcinoma incidence** among women in the NHS according to cumulative dose of permanent hair dye use <sup>a</sup> and natural hair color, obtained from Cox models with updated covariate values (assuming a latency of 6, 10, 16 and 20 years)

**Supplementary Table 34.** Age-adjusted and multivariable (MV)-adjusted hazard ratios (HR) and 95% confidence intervals (CI) of **breast cancer incidence** among women in the NHS according to status of personal use of permanent hair dyes and natural hair color, obtained from Cox models with updated covariate values (assuming a latency of 6, 10, 16 and 20 years)

**Supplementary Table 35.** Age-adjusted and multivariable (MV)-adjusted hazard ratios (HR) and 95% confidence intervals (CI) of **breast cancer incidence** among women in the NHS according to cumulative dose of permanent hair dye use <sup>a</sup> and natural hair color, obtained from Cox models with updated covariate values (assuming a latency of 6, 10, 16 and 20 years)

**Supplementary Table 36.** Age-adjusted and multivariable (MV)-adjusted hazard ratios (HR) and 95% confidence intervals (CI) of **ovarian cancer incidence** among women in the NHS according to status of personal use of permanent hair dyes and natural hair color, obtained from Cox models with updated covariate values (assuming a latency of 6, 10, 16 and 20 years)

**Supplementary Table 37.** Age-adjusted and multivariable (MV)-adjusted hazard ratios (HR) and 95% confidence intervals (CI) of **ovarian cancer incidence** among women in the NHS according to cumulative dose of permanent hair dye use <sup>a</sup> and natural hair color, obtained from Cox models with updated covariate values (assuming a latency of 6, 10, 16 and 20 years)

**Supplementary Table 38.** Age-adjusted and multivariable (MV)-adjusted hazard ratios (HR) and 95% confidence intervals (CI) of **overall cancer incidence** among women in the NHS according to status of personal use of permanent hair dyes and natural hair color, obtained from Cox models with updated covariate values (restricting follow-up to the first 10 and 20 years after exposure assessments stopped)

**Supplementary Table 39.** Age-adjusted and multivariable (MV)-adjusted hazard ratios (HR) and 95% confidence intervals (CI) of **overall cancer incidence** among women in the NHS according to cumulative dose of permanent hair dye use <sup>a</sup> and natural hair color, obtained from Cox models with updated covariate values (restricting follow-up to the first 10 and 20 years after exposure assessments stopped)

**Supplementary Table 40.** Age-adjusted and multivariable (MV)-adjusted hazard ratios (HR) and 95% confidence intervals (CI) of **basal cell carcinoma incidence** among women in the NHS according to status of personal use of permanent hair dyes and natural hair color, obtained from Cox models with updated covariate values (restricting follow-up to the first 10 and 20 years after exposure assessments stopped)

**Supplementary Table 41.** Age-adjusted and multivariable (MV)-adjusted hazard ratios (HR) and 95% confidence intervals (CI) of **basal cell carcinoma incidence** among women in the NHS according to cumulative dose of permanent hair dye use <sup>a</sup> and natural hair color, obtained from Cox models with updated covariate values (restricting follow-up to the first 10 and 20 years after exposure assessments stopped)

**Supplementary Table 42.** Age-adjusted and multivariable (MV)-adjusted hazard ratios (HR) and 95% confidence intervals (CI) of **breast cancer incidence** among women in the NHS according to status of personal use of permanent hair dyes and natural hair color, obtained from Cox models with updated covariate values (restricting follow-up to the first 10 and 20 years after exposure assessments stopped)

**Supplementary Table 43.** Age-adjusted and multivariable (MV)-adjusted hazard ratios (HR) and 95% confidence intervals (CI) of **breast cancer incidence** among women in the NHS according to cumulative dose of permanent hair dye use <sup>a</sup> and natural hair color, obtained from Cox models with updated covariate values (restricting follow-up to the first 10 and 20 years after exposure assessments stopped)

**Supplementary Table 44.** Age-adjusted and multivariable (MV)-adjusted hazard ratios (HR) and 95% confidence intervals (CI) of **ovarian cancer incidence** among women in the NHS according to status of personal use of permanent hair dyes and natural hair color, obtained from Cox models with updated covariate values (restricting follow-up to the first 10 and 20 years after exposure assessments stopped)

**Supplementary Table 45.** Age-adjusted and multivariable (MV)-adjusted hazard ratios (HR) and 95% confidence intervals (CI) of **ovarian cancer incidence** among women in the NHS according to cumulative dose of permanent hair dye use <sup>a</sup> and natural hair color, obtained from Cox models with updated covariate values (restricting follow-up to the first 10 and 20 years after exposure assessments stopped)

**Supplementary Table 46.** Multivariable (MV)-adjusted hazard ratios (HR) and 95% confidence intervals (CI) of **overall and specific cancer incidence and cancer-related death** among women in the NHS with any hair color according to status of personal use of permanent hair dyes, obtained from Cox models with updated covariate values (using baseline exposure information only)

**Supplementary Figure 1.** Dose-response relationship between cumulative dose of personal permanent hair dye use and overall cancer incidence

**Supplementary Figure 2.** Dose-response relationship between cumulative dose of personal permanent hair dye use and overall solid cancer incidence

**Supplementary Figure 3.** Dose-response relationship between cumulative dose of personal permanent hair dye use and basal cell carcinoma incidence

**Supplementary Figure 4.** Dose-response relationship between cumulative dose of personal permanent hair dye use and cutaneous squamous cell carcinoma incidence

**Supplementary Figure 5.** Dose-response relationship between cumulative dose of personal permanent hair dye use and melanoma incidence

**Supplementary Figure 6.** Dose-response relationship between cumulative dose of personal permanent hair dye use and overall breast cancer incidence

**Supplementary Figure 7.** Dose-response relationship between cumulative dose of personal permanent hair dye use and breast cancer (ER+) incidence

**Supplementary Figure 8.** Dose-response relationship between cumulative dose of personal permanent hair dye use and breast cancer (ER-) incidence

**Supplementary Figure 9.** Dose-response relationship between cumulative dose of personal permanent hair dye use and breast cancer (PR+) incidence

**Supplementary Figure 10.** Dose-response relationship between cumulative dose of personal permanent hair dye use and breast cancer (PR-) incidence

**Supplementary Figure 11.** Dose-response relationship between cumulative dose of personal permanent hair dye use and breast cancer (ER+/PR+) incidence

**Supplementary Figure 12.** Dose-response relationship between cumulative dose of personal permanent hair dye use and breast cancer (ER+/PR-) incidence

**Supplementary Figure 13.** Dose-response relationship between cumulative dose of personal permanent hair dye use and breast cancer (ER-/PR-) incidence

**Supplementary Figure 14.** Dose-response relationship between cumulative dose of personal permanent hair dye use and ovarian cancer incidence

**Supplementary Figure 15.** Dose-response relationship between cumulative dose of personal permanent hair dye use and colorectal cancer incidence

**Supplementary Figure 16.** Dose-response relationship between cumulative dose of personal permanent hair dye use and bladder cancer incidence

**Supplementary Figure 17.** Dose-response relationship between cumulative dose of personal permanent hair dye use and kidney cancer incidence

**Supplementary Figure 18.** Dose-response relationship between cumulative dose of personal permanent hair dye use and lung cancer incidence

**Supplementary Figure 19.** Dose-response relationship between cumulative dose of personal permanent hair dye use and brain cancer incidence

**Supplementary Figure 20.** Dose-response relationship between cumulative dose of personal permanent hair dye use and overall hematopoietic cancer incidence

**Supplementary Figure 21.** Dose-response relationship between cumulative dose of personal permanent hair dye use and overall non-Hodgkin lymphoma incidence

**Supplementary Figure 22.** Dose-response relationship between cumulative dose of personal permanent hair dye use and T-cell lymphoma incidence

**Supplementary Figure 23.** Dose-response relationship between cumulative dose of personal permanent hair dye use and diffuse large B-cell lymphoma incidence

**Supplementary Figure 24.** Dose-response relationship between cumulative dose of personal permanent hair dye use and follicular lymphoma incidence

**Supplementary Figure 25.** Dose-response relationship between cumulative dose of personal permanent hair dye use and chronic lymphocytic leukemia/small lymphocytic lymphoma incidence

**Supplementary Figure 26.** Dose-response relationship between cumulative dose of personal permanent hair dye use and Hodgkin lymphoma incidence

**Supplementary Figure 27.** Dose-response relationship between cumulative dose of personal permanent hair dye use and multiple myeloma incidence

**Supplementary Figure 28.** Dose-response relationship between cumulative dose of personal permanent hair dye use and myeloid leukemia incidence

**Supplementary Figure 29.** Dose-response relationship between cumulative dose of personal permanent hair dye use and cancer-related death



|                      |       |                  |                  |      |                  |                  |      |                  |                  |
|----------------------|-------|------------------|------------------|------|------------------|------------------|------|------------------|------------------|
| Non-user             | 13245 |                  |                  | 5067 |                  |                  | 5134 |                  |                  |
| <30 years            | 4930  | 1 [Reference]    | 1 [Reference]    | 1819 | 1 [Reference]    | 1 [Reference]    | 2103 | 1 [Reference]    | 1 [Reference]    |
| ≥30 years            | 4437  | 1.01 (0.97-1.06) | 1.00 (0.96-1.05) | 1503 | 1.02 (0.94-1.10) | 1.02 (0.95-1.11) | 2180 | 0.95 (0.89-1.02) | 0.95 (0.88-1.01) |
| Time since first use |       |                  |                  |      |                  |                  |      |                  |                  |
| Non-user             | 13245 |                  |                  | 5067 |                  |                  | 5134 |                  |                  |
| <30 years            | 3662  | 1 [Reference]    | 1 [Reference]    | 1166 | 1 [Reference]    | 1 [Reference]    | 1818 | 1 [Reference]    | 1 [Reference]    |
| ≥30 years            | 5705  | 0.98 (0.93-1.03) | 0.99 (0.94-1.04) | 2156 | 1.02 (0.94-1.12) | 1.05 (0.96-1.14) | 2465 | 0.90 (0.84-0.97) | 0.92 (0.85-0.99) |

MV: multivariable; HR: hazard ratio; CI: confidence interval; BMI: body mass index

\* Not including basal cell carcinoma and cutaneous squamous cell carcinoma.

<sup>a</sup> Including participants whose natural hair color was black, dark brown, red, blond, or light brown, or who had missing information on natural hair color.

<sup>b</sup> Dark natural hair color: black and dark brown.

<sup>c</sup> Light natural hair color: red, blond, and light brown.

<sup>d</sup> Participants were excluded from stratified analyses if they had missing information on natural hair color. The number of cases among “dark hair color” and “light hair color” women does not sum to the total number of cases in “any hair color” women due to the inclusion of women with missing hair color information in the “any hair color” group.

<sup>e</sup> Models were adjusted for age and follow-up cycle.

<sup>f</sup> Models were additionally adjusted for race, natural hair color, cumulative average BMI, BMI at age 18, smoking status, pack-years of smoking, and alcohol intake. In analyses stratified by natural hair color, models were not further adjusted for natural hair color.

<sup>g</sup> Cumulative dose is the product of average frequency of use (times per year) multiplied by duration of use (years).

<sup>h</sup> *P*-value for trend was calculated using the mid-point of each category of cumulative dose in times.

<sup>i</sup> *P*-value for trend was calculated using cumulative dose in times as continuous.

**Supplementary Table 2.** Age-adjusted and multivariable (MV)-adjusted hazard ratios (HR) and 95% confidence intervals (CI) of **overall solid cancer incidence** (n=20805) \* among women in the NHS according to personal use of permanent hair dyes and natural hair color, obtained from Cox models with updated covariate values

| All solid cancers *                    | Any hair color <sup>a</sup> (n=20805) |                                          |                                         | Dark hair color <sup>b,d</sup> (n=7648) |                                          |                                         | Light hair color <sup>c,d</sup> (n=8708) |                                          |                                         |
|----------------------------------------|---------------------------------------|------------------------------------------|-----------------------------------------|-----------------------------------------|------------------------------------------|-----------------------------------------|------------------------------------------|------------------------------------------|-----------------------------------------|
|                                        | No. of cases                          | Age-adjusted <sup>e</sup><br>HR (95% CI) | MV-adjusted <sup>f</sup><br>HR (95% CI) | No. of cases                            | Age-adjusted <sup>e</sup><br>HR (95% CI) | MV-adjusted <sup>f</sup><br>HR (95% CI) | No. of cases                             | Age-adjusted <sup>e</sup><br>HR (95% CI) | MV-adjusted <sup>f</sup><br>HR (95% CI) |
| Ever use                               |                                       |                                          |                                         |                                         |                                          |                                         |                                          |                                          |                                         |
| Non-user                               | 12178                                 | 1 [Reference]                            | 1 [Reference]                           | 4630                                    | 1 [Reference]                            | 1 [Reference]                           | 4732                                     | 1 [Reference]                            | 1 [Reference]                           |
| Ever-user                              | 8627                                  | 1.02 (0.99-1.04)                         | 0.98 (0.96-1.01)                        | 3018                                    | 1.02 (0.97-1.06)                         | 0.99 (0.95-1.04)                        | 3976                                     | 1.00 (0.96-1.05)                         | 0.98 (0.94-1.02)                        |
| Duration of use                        |                                       |                                          |                                         |                                         |                                          |                                         |                                          |                                          |                                         |
| Non-user                               | 12178                                 | 1 [Reference]                            | 1 [Reference]                           | 4630                                    | 1 [Reference]                            | 1 [Reference]                           | 4732                                     | 1 [Reference]                            | 1 [Reference]                           |
| <5 years                               | 3349                                  | 1.01 (0.97-1.05)                         | 0.98 (0.94-1.02)                        | 1229                                    | 1.03 (0.96-1.09)                         | 1.01 (0.94-1.07)                        | 1431                                     | 0.99 (0.93-1.05)                         | 0.96 (0.91-1.02)                        |
| 5-9 years                              | 2068                                  | 1.04 (0.99-1.09)                         | 1.01 (0.96-1.06)                        | 789                                     | 1.03 (0.95-1.11)                         | 1.01 (0.93-1.09)                        | 887                                      | 1.01 (0.94-1.09)                         | 0.99 (0.92-1.07)                        |
| ≥10 years                              | 3210                                  | 1.01 (0.97-1.05)                         | 0.97 (0.94-1.01)                        | 1000                                    | 0.99 (0.93-1.06)                         | 0.97 (0.90-1.04)                        | 1658                                     | 1.02 (0.96-1.07)                         | 0.99 (0.94-1.05)                        |
| <i>P</i> -value for trend              |                                       | .44                                      | .27                                     |                                         | 1.00                                     | .41                                     |                                          | .53                                      | .91                                     |
| Frequency of use                       |                                       |                                          |                                         |                                         |                                          |                                         |                                          |                                          |                                         |
| Non-user                               | 12178                                 | 1 [Reference]                            | 1 [Reference]                           | 4630                                    | 1 [Reference]                            | 1 [Reference]                           | 4732                                     | 1 [Reference]                            | 1 [Reference]                           |
| Every ≥5 weeks                         | 3767                                  | 1.03 (0.99-1.07)                         | 0.98 (0.94-1.02)                        | 1371                                    | 1.03 (0.97-1.10)                         | 1.01 (0.95-1.07)                        | 1904                                     | 1.01 (0.95-1.06)                         | 0.98 (0.93-1.03)                        |
| Every 1-4 weeks                        | 4860                                  | 1.01 (0.97-1.04)                         | 0.99 (0.95-1.02)                        | 1647                                    | 1.00 (0.95-1.06)                         | 0.98 (0.93-1.04)                        | 2072                                     | 1.00 (0.95-1.06)                         | 0.98 (0.93-1.04)                        |
| <i>P</i> -value for trend              |                                       | .64                                      | .40                                     |                                         | .93                                      | .58                                     |                                          | .93                                      | .53                                     |
| Cumulative dose <sup>g</sup>           |                                       |                                          |                                         |                                         |                                          |                                         |                                          |                                          |                                         |
| Non-user                               | 12178                                 | 1 [Reference]                            | 1 [Reference]                           | 4630                                    | 1 [Reference]                            | 1 [Reference]                           | 4732                                     | 1 [Reference]                            | 1 [Reference]                           |
| 1-99 times                             | 4123                                  | 1.01 (0.97-1.05)                         | 0.97 (0.94-1.01)                        | 1512                                    | 1.03 (0.97-1.09)                         | 1.00 (0.95-1.06)                        | 1846                                     | 0.98 (0.93-1.03)                         | 0.95 (0.90-1.00)                        |
| 100-199 times                          | 2221                                  | 1.02 (0.98-1.07)                         | 0.99 (0.95-1.04)                        | 841                                     | 1.03 (0.95-1.11)                         | 1.01 (0.93-1.08)                        | 1020                                     | 0.99 (0.92-1.06)                         | 0.97 (0.91-1.04)                        |
| ≥200 times                             | 2283                                  | 1.02 (0.98-1.07)                         | 1.00 (0.96-1.05)                        | 665                                     | 0.97 (0.89-1.05)                         | 0.96 (0.88-1.04)                        | 1110                                     | 1.07 (1.00-1.14)                         | 1.05 (0.98-1.12)                        |
| <i>P</i> -value for trend <sup>h</sup> |                                       | .26                                      | .99                                     |                                         | .72                                      | .38                                     |                                          | .08                                      | .25                                     |
| Per 50-time increment                  |                                       | 1.00 (1.00-1.00)                         | 1.00 (0.99-1.00)                        |                                         | 1.00 (0.99-1.01)                         | 1.00 (0.99-1.01)                        |                                          | 1.00 (1.00-1.01)                         | 1.00 (1.00-1.01)                        |
| <i>P</i> -value for trend <sup>i</sup> |                                       | .86                                      | .64                                     |                                         | .62                                      | .39                                     |                                          | .27                                      | .59                                     |
| Age at first use                       |                                       |                                          |                                         |                                         |                                          |                                         |                                          |                                          |                                         |

|                      |       |                  |                  |      |                  |                  |      |                  |                  |
|----------------------|-------|------------------|------------------|------|------------------|------------------|------|------------------|------------------|
| Non-user             | 12178 |                  |                  | 4630 |                  |                  | 4732 |                  |                  |
| <30 years            | 4518  | 1 [Reference]    | 1 [Reference]    | 1642 | 1 [Reference]    | 1 [Reference]    | 1945 | 1 [Reference]    | 1 [Reference]    |
| ≥30 years            | 4109  | 1.02 (0.98-1.07) | 1.01 (0.96-1.06) | 1376 | 1.03 (0.95-1.12) | 1.04 (0.96-1.13) | 2031 | 0.96 (0.89-1.03) | 0.95 (0.89-1.02) |
| Time since first use |       |                  |                  |      |                  |                  |      |                  |                  |
| Non-user             | 12178 |                  |                  | 4630 |                  |                  | 4732 |                  |                  |
| <30 years            | 3342  | 1 [Reference]    | 1 [Reference]    | 1040 | 1 [Reference]    | 1 [Reference]    | 1684 | 1 [Reference]    | 1 [Reference]    |
| ≥30 years            | 5285  | 0.97 (0.92-1.03) | 0.99 (0.94-1.05) | 1978 | 1.03 (0.94-1.13) | 1.05 (0.96-1.15) | 2292 | 0.89 (0.83-0.96) | 0.91 (0.84-0.98) |

MV: multivariable; HR: hazard ratio; CI: confidence interval; BMI: body mass index

\* Not including basal cell carcinoma and cutaneous squamous cell carcinoma.

<sup>a</sup> Including participants whose natural hair color was black, dark brown, red, blond, or light brown, or who had missing information on natural hair color.

<sup>b</sup> Dark natural hair color: black and dark brown.

<sup>c</sup> Light natural hair color: red, blond, and light brown.

<sup>d</sup> Participants were excluded from stratified analyses if they had missing information on natural hair color. The number of cases among “dark hair color” and “light hair color” women does not sum to the total number of cases in “any hair color” women due to the inclusion of women with missing hair color information in the “any hair color” group.

<sup>e</sup> Models were adjusted for age and follow-up cycle.

<sup>f</sup> Models were additionally adjusted for race, natural hair color, cumulative average BMI, BMI at age 18, smoking status, pack-years of smoking, and alcohol intake. In analyses stratified by natural hair color, models were not further adjusted for natural hair color.

<sup>g</sup> Cumulative dose is the product of average frequency of use (times per year) multiplied by duration of use (years).

<sup>h</sup> *P*-value for trend was calculated using the mid-point of each category of cumulative dose in times.

<sup>i</sup> *P*-value for trend was calculated using cumulative dose in times as continuous.



|                      |       |                  |                  |      |                  |                  |      |                  |                  |
|----------------------|-------|------------------|------------------|------|------------------|------------------|------|------------------|------------------|
| Non-user             | 12536 |                  |                  | 4538 |                  |                  | 5891 |                  |                  |
| <30 years            | 5155  | 1 [Reference]    | 1 [Reference]    | 1806 | 1 [Reference]    | 1 [Reference]    | 2596 | 1 [Reference]    | 1 [Reference]    |
| ≥30 years            | 4869  | 1.04 (0.99-1.09) | 0.98 (0.93-1.03) | 1393 | 0.93 (0.86-1.01) | 0.92 (0.84-0.99) | 2847 | 1.01 (0.95-1.08) | 0.99 (0.93-1.05) |
| Time since first use |       |                  |                  |      |                  |                  |      |                  |                  |
| Non-user             | 12536 |                  |                  | 4538 |                  |                  | 5891 |                  |                  |
| <30 years            | 3885  | 1 [Reference]    | 1 [Reference]    | 1141 | 1 [Reference]    | 1 [Reference]    | 2153 | 1 [Reference]    | 1 [Reference]    |
| ≥30 years            | 6139  | 0.97 (0.92-1.02) | 0.98 (0.93-1.04) | 2058 | 0.94 (0.86-1.03) | 0.99 (0.91-1.09) | 3290 | 0.97 (0.91-1.04) | 1.00 (0.93-1.06) |

MV: multivariable; HR: hazard ratio; CI: confidence interval; BMI: body mass index; UV: ultraviolet

<sup>a</sup> Including participants whose natural hair color was black, dark brown, red, blond, or light brown, or who had missing information on natural hair color.

<sup>b</sup> Dark natural hair color: black and dark brown.

<sup>c</sup> Light natural hair color: red, blond, and light brown.

<sup>d</sup> Participants were excluded from stratified analyses if they had missing information on natural hair color. The number of cases among “dark hair color” and “light hair color” women does not sum to the total number of cases in “any hair color” women due to the inclusion of women with missing hair color information in the “any hair color” group.

<sup>e</sup> Models were adjusted for age and follow-up cycle.

<sup>f</sup> Models were additionally adjusted for race, natural hair color, cumulative average BMI, BMI at age 18, smoking status, pack-years of smoking, alcohol intake, childhood reaction to sun, lifetime blistering sunburns, number of moles on arms, and cumulative UV flux since baseline. In analyses stratified by natural hair color, models were not further adjusted for natural hair color.

<sup>g</sup> Cumulative dose is the product of average frequency of use (times per year) multiplied by duration of use (years).

<sup>h</sup> *P*-value for trend was calculated using the mid-point of each category of cumulative dose in times.

<sup>i</sup> *P*-value for trend was calculated using cumulative dose in times as continuous.



|                      |      |                  |                  |     |                  |                  |     |                  |                  |
|----------------------|------|------------------|------------------|-----|------------------|------------------|-----|------------------|------------------|
| Non-user             | 1581 |                  |                  | 558 |                  |                  | 747 |                  |                  |
| <30 years            | 605  | 1 [Reference]    | 1 [Reference]    | 214 | 1 [Reference]    | 1 [Reference]    | 300 | 1 [Reference]    | 1 [Reference]    |
| ≥30 years            | 606  | 1.12 (0.99-1.27) | 1.03 (0.90-1.17) | 187 | 1.07 (0.86-1.34) | 1.07 (0.85-1.34) | 328 | 1.04 (0.87-1.24) | 0.99 (0.82-1.18) |
| Time since first use |      |                  |                  |     |                  |                  |     |                  |                  |
| Non-user             | 1581 |                  |                  | 558 |                  |                  | 747 |                  |                  |
| <30 years            | 605  | 1 [Reference]    | 1 [Reference]    | 199 | 1 [Reference]    | 1 [Reference]    | 302 | 1 [Reference]    | 1 [Reference]    |
| ≥30 years            | 606  | 1.03 (0.91-1.18) | 1.06 (0.92-1.21) | 202 | 0.93 (0.74-1.17) | 0.98 (0.77-1.24) | 326 | 1.11 (0.93-1.32) | 1.16 (0.96-1.39) |

MV: multivariable; HR: hazard ratio; CI: confidence interval; BMI: body mass index; UV: ultraviolet

<sup>a</sup> Including participants whose natural hair color was black, dark brown, red, blond, or light brown, or who had missing information on natural hair color.

<sup>b</sup> Dark natural hair color: black and dark brown.

<sup>c</sup> Light natural hair color: red, blond, and light brown.

<sup>d</sup> Participants were excluded from stratified analyses if they had missing information on natural hair color. The number of cases among “dark hair color” and “light hair color” women does not sum to the total number of cases in “any hair color” women due to the inclusion of women with missing hair color information in the “any hair color” group.

<sup>e</sup> Models were adjusted for age and follow-up cycle.

<sup>f</sup> Models were additionally adjusted for race, natural hair color, cumulative average BMI, BMI at age 18, smoking status, pack-years of smoking, alcohol intake, childhood reaction to sun, lifetime blistering sunburns, number of moles on arms, and cumulative UV flux since baseline. In analyses stratified by natural hair color, models were not further adjusted for natural hair color.

<sup>g</sup> Cumulative dose is the product of average frequency of use (times per year) multiplied by duration of use (years).

<sup>h</sup> *P*-value for trend was calculated using the mid-point of each category of cumulative dose in times.

<sup>i</sup> *P*-value for trend was calculated using cumulative dose in times as continuous.



|                      |     |                  |                  |     |                  |                  |     |                  |                  |
|----------------------|-----|------------------|------------------|-----|------------------|------------------|-----|------------------|------------------|
| Non-user             | 703 |                  |                  | 244 |                  |                  | 316 |                  |                  |
| <30 years            | 213 | 1 [Reference]    | 1 [Reference]    | 70  | 1 [Reference]    | 1 [Reference]    | 103 | 1 [Reference]    | 1 [Reference]    |
| ≥30 years            | 282 | 1.21 (0.99-1.48) | 1.13 (0.91-1.40) | 72  | 1.09 (0.75-1.57) | 1.03 (0.71-1.51) | 161 | 1.13 (0.85-1.50) | 1.19 (0.88-1.59) |
| Time since first use |     |                  |                  |     |                  |                  |     |                  |                  |
| Non-user             | 703 |                  |                  | 244 |                  |                  | 316 |                  |                  |
| <30 years            | 179 | 1 [Reference]    | 1 [Reference]    | 46  | 1 [Reference]    | 1 [Reference]    | 97  | 1 [Reference]    | 1 [Reference]    |
| ≥30 years            | 316 | 0.97 (0.77-1.23) | 0.97 (0.76-1.24) | 96  | 0.81 (0.51-1.28) | 0.76 (0.48-1.22) | 167 | 1.06 (0.77-1.44) | 1.12 (0.81-1.54) |

MV: multivariable; HR: hazard ratio; CI: confidence interval; BMI: body mass index; UV: ultraviolet

<sup>a</sup> Including participants whose natural hair color was black, dark brown, red, blond, or light brown, or who had missing information on natural hair color.

<sup>b</sup> Dark natural hair color: black and dark brown.

<sup>c</sup> Light natural hair color: red, blond, and light brown.

<sup>d</sup> Participants were excluded from stratified analyses if they had missing information on natural hair color. The number of cases among “dark hair color” and “light hair color” women does not sum to the total number of cases in “any hair color” women due to the inclusion of women with missing hair color information in the “any hair color” group.

<sup>e</sup> Models were adjusted for age and follow-up cycle.

<sup>f</sup> Models were additionally adjusted for race, natural hair color, cumulative average BMI, BMI at age 18, smoking status, pack-years of smoking, alcohol intake, childhood reaction to sun, lifetime blistering sunburns, number of moles on arms, and cumulative UV flux since baseline. In analyses stratified by natural hair color, models were not further adjusted for natural hair color.

<sup>g</sup> Cumulative dose is the product of average frequency of use (times per year) multiplied by duration of use (years).

<sup>h</sup> *P*-value for trend was calculated using the mid-point of each category of cumulative dose in times.

<sup>i</sup> *P*-value for trend was calculated using cumulative dose in times as continuous.



|                      |      |                  |                  |      |                  |                  |      |                  |                  |
|----------------------|------|------------------|------------------|------|------------------|------------------|------|------------------|------------------|
| Non-user             | 5332 |                  |                  | 2117 |                  |                  | 2084 |                  |                  |
| <30 years            | 1990 | 1 [Reference]    | 1 [Reference]    | 760  | 1 [Reference]    | 1 [Reference]    | 868  | 1 [Reference]    | 1 [Reference]    |
| ≥30 years            | 1930 | 1.02 (0.95-1.09) | 1.01 (0.94-1.09) | 688  | 1.03 (0.92-1.16) | 1.05 (0.93-1.18) | 950  | 0.95 (0.85-1.05) | 0.95 (0.85-1.06) |
| Time since first use |      |                  |                  |      |                  |                  |      |                  |                  |
| Non-user             | 5332 |                  |                  | 2117 |                  |                  | 2084 |                  |                  |
| <30 years            | 1274 | 1 [Reference]    | 1 [Reference]    | 416  | 1 [Reference]    | 1 [Reference]    | 633  | 1 [Reference]    | 1 [Reference]    |
| ≥30 years            | 2646 | 1.05 (0.96-1.13) | 1.04 (0.96-1.14) | 1032 | 1.09 (0.95-1.26) | 1.12 (0.97-1.29) | 1185 | 0.98 (0.87-1.10) | 0.97 (0.86-1.09) |

MV: multivariable; HR: hazard ratio; CI: confidence interval; BMI: body mass index

<sup>a</sup> Including participants whose natural hair color was black, dark brown, red, blond, or light brown, or who had missing information on natural hair color.

<sup>b</sup> Dark natural hair color: black and dark brown.

<sup>c</sup> Light natural hair color: red, blond, and light brown.

<sup>d</sup> Participants were excluded from stratified analyses if they had missing information on natural hair color. The number of cases among “dark hair color” and “light hair color” women does not sum to the total number of cases in “any hair color” women due to the inclusion of women with missing hair color information in the “any hair color” group.

<sup>e</sup> Models were adjusted for age and follow-up cycle.

<sup>f</sup> Models were additionally adjusted for race, natural hair color, cumulative average BMI, BMI at age 18, smoking status, pack-years of smoking, alcohol intake, menopausal status, postmenopausal hormone use, oral contraceptive use, adolescent body size, age at menarche, age at first birth, parity, breastfeeding, first-degree family history of breast cancer, history of benign breast disease, and current mammography use. In analyses stratified by natural hair color, models were not further adjusted for natural hair color.

<sup>g</sup> Cumulative dose is the product of average frequency of use (times per year) multiplied by duration of use (years).

<sup>h</sup> *P*-value for trend was calculated using the mid-point of each category of cumulative dose in times.

<sup>i</sup> *P*-value for trend was calculated using cumulative dose in times as continuous.



|                      |      |                  |                  |      |                  |                  |      |                  |                  |
|----------------------|------|------------------|------------------|------|------------------|------------------|------|------------------|------------------|
| Non-user             | 3401 |                  |                  | 1425 |                  |                  | 1393 |                  |                  |
| <30 years            | 1257 | 1 [Reference]    | 1 [Reference]    | 461  | 1 [Reference]    | 1 [Reference]    | 640  | 1 [Reference]    | 1 [Reference]    |
| ≥30 years            | 1247 | 1.06 (1.00-1.13) | 1.01 (0.95-1.08) | 502  | 1.08 (0.97-1.20) | 1.07 (0.96-1.19) | 562  | 1.00 (0.92-1.10) | 0.99 (0.90-1.09) |
| Time since first use |      |                  |                  |      |                  |                  |      |                  |                  |
| Non-user             | 3401 |                  |                  | 1425 |                  |                  | 1393 |                  |                  |
| <30 years            | 1644 | 1 [Reference]    | 1 [Reference]    | 668  | 1 [Reference]    | 1 [Reference]    | 762  | 1 [Reference]    | 1 [Reference]    |
| ≥30 years            | 860  | 1.09 (1.03-1.16) | 1.03 (0.97-1.09) | 295  | 1.08 (0.98-1.18) | 1.05 (0.96-1.16) | 440  | 1.05 (0.96-1.15) | 1.02 (0.93-1.12) |

MV: multivariable; HR: hazard ratio; CI: confidence interval; ER: estrogen receptor; BMI: body mass index

\* Hormone receptor status was not available for all the breast cancer cases.

<sup>a</sup> Including participants whose natural hair color was black, dark brown, red, blond, or light brown, or who had missing information on natural hair color.

<sup>b</sup> Dark natural hair color: black and dark brown.

<sup>c</sup> Light natural hair color: red, blond, and light brown.

<sup>d</sup> Participants were excluded from stratified analyses if they had missing information on natural hair color. The number of cases among “dark hair color” and “light hair color” women does not sum to the total number of cases in “any hair color” women due to the inclusion of women with missing hair color information in the “any hair color” group.

<sup>e</sup> Models were adjusted for age and follow-up cycle.

<sup>f</sup> Models were additionally adjusted for race, natural hair color, cumulative average BMI, BMI at age 18, smoking status, pack-years of smoking, alcohol intake, menopausal status, postmenopausal hormone use, oral contraceptive use, adolescent body size, age at menarche, age at first birth, parity, breastfeeding, first-degree family history of breast cancer, history of benign breast disease, and current mammography use. In analyses stratified by natural hair color, models were not further adjusted for natural hair color.

<sup>g</sup> Cumulative dose is the product of average frequency of use (times per year) multiplied by duration of use (years).

<sup>h</sup> *P*-value for trend was calculated using the mid-point of each category of cumulative dose in times.

<sup>i</sup> *P*-value for trend was calculated using cumulative dose in times as continuous.



|                      |     |                  |                  |     |                  |                  |     |                  |                  |
|----------------------|-----|------------------|------------------|-----|------------------|------------------|-----|------------------|------------------|
| Non-user             | 878 |                  |                  | 353 |                  |                  | 353 |                  |                  |
| <30 years            | 324 | 1 [Reference]    | 1 [Reference]    | 128 | 1 [Reference]    | 1 [Reference]    | 155 | 1 [Reference]    | 1 [Reference]    |
| ≥30 years            | 319 | 1.03 (0.91-1.17) | 1.00 (0.88-1.14) | 129 | 1.15 (0.94-1.40) | 1.18 (0.96-1.45) | 141 | 0.93 (0.77-1.12) | 0.93 (0.77-1.13) |
| Time since first use |     |                  |                  |     |                  |                  |     |                  |                  |
| Non-user             | 878 |                  |                  | 353 |                  |                  | 353 |                  |                  |
| <30 years            | 466 | 1 [Reference]    | 1 [Reference]    | 199 | 1 [Reference]    | 1 [Reference]    | 201 | 1 [Reference]    | 1 [Reference]    |
| ≥30 years            | 177 | 1.02 (0.91-1.14) | 0.99 (0.88-1.11) | 58  | 1.15 (0.96-1.37) | 1.17 (0.98-1.40) | 95  | 0.93 (0.78-1.10) | 0.90 (0.75-1.07) |

MV: multivariable; HR: hazard ratio; CI: confidence interval; ER: estrogen receptor; BMI: body mass index

\* Hormone receptor status was not available for all the breast cancer cases.

<sup>a</sup> Including participants whose natural hair color was black, dark brown, red, blond, or light brown, or who had missing information on natural hair color.

<sup>b</sup> Dark natural hair color: black and dark brown.

<sup>c</sup> Light natural hair color: red, blond, and light brown.

<sup>d</sup> Participants were excluded from stratified analyses if they had missing information on natural hair color. The number of cases among “dark hair color” and “light hair color” women does not sum to the total number of cases in “any hair color” women due to the inclusion of women with missing hair color information in the “any hair color” group.

<sup>e</sup> Models were adjusted for age and follow-up cycle.

<sup>f</sup> Models were additionally adjusted for race, natural hair color, cumulative average BMI, BMI at age 18, smoking status, pack-years of smoking, alcohol intake, menopausal status, postmenopausal hormone use, oral contraceptive use, adolescent body size, age at menarche, age at first birth, parity, breastfeeding, first-degree family history of breast cancer, history of benign breast disease, and current mammography use. In analyses stratified by natural hair color, models were not further adjusted for natural hair color.

<sup>g</sup> Cumulative dose is the product of average frequency of use (times per year) multiplied by duration of use (years).

<sup>h</sup> *P*-value for trend was calculated using the mid-point of each category of cumulative dose in times.

<sup>i</sup> *P*-value for trend was calculated using cumulative dose in times as continuous.



|                      |      |                  |                  |      |                  |                  |      |                  |                  |
|----------------------|------|------------------|------------------|------|------------------|------------------|------|------------------|------------------|
| Non-user             | 2805 |                  |                  | 1168 |                  |                  | 1175 |                  |                  |
| <30 years            | 1021 | 1 [Reference]    | 1 [Reference]    | 365  | 1 [Reference]    | 1 [Reference]    | 529  | 1 [Reference]    | 1 [Reference]    |
| ≥30 years            | 1000 | 1.02 (0.95-1.10) | 0.97 (0.90-1.04) | 400  | 1.03 (0.92-1.16) | 1.01 (0.90-1.14) | 444  | 0.97 (0.87-1.07) | 0.94 (0.85-1.05) |
| Time since first use |      |                  |                  |      |                  |                  |      |                  |                  |
| Non-user             | 2805 |                  |                  | 1168 |                  |                  | 1175 |                  |                  |
| <30 years            | 1293 | 1 [Reference]    | 1 [Reference]    | 520  | 1 [Reference]    | 1 [Reference]    | 597  | 1 [Reference]    | 1 [Reference]    |
| ≥30 years            | 728  | 1.05 (0.98-1.12) | 0.99 (0.92-1.05) | 245  | 1.04 (0.93-1.15) | 1.01 (0.91-1.13) | 376  | 0.98 (0.89-1.08) | 0.95 (0.86-1.05) |

MV: multivariable; HR: hazard ratio; CI: confidence interval; PR: progesterone receptor; BMI: body mass index

\* Hormone receptor status was not available for all the breast cancer cases.

<sup>a</sup> Including participants whose natural hair color was black, dark brown, red, blond, or light brown, or who had missing information on natural hair color.

<sup>b</sup> Dark natural hair color: black and dark brown.

<sup>c</sup> Light natural hair color: red, blond, and light brown.

<sup>d</sup> Participants were excluded from stratified analyses if they had missing information on natural hair color. The number of cases among “dark hair color” and “light hair color” women does not sum to the total number of cases in “any hair color” women due to the inclusion of women with missing hair color information in the “any hair color” group.

<sup>e</sup> Models were adjusted for age and follow-up cycle.

<sup>f</sup> Models were additionally adjusted for race, natural hair color, cumulative average BMI, BMI at age 18, smoking status, pack-years of smoking, alcohol intake, menopausal status, postmenopausal hormone use, oral contraceptive use, adolescent body size, age at menarche, age at first birth, parity, breastfeeding, first-degree family history of breast cancer, history of benign breast disease, and current mammography use. In analyses stratified by natural hair color, models were not further adjusted for natural hair color.

<sup>g</sup> Cumulative dose is the product of average frequency of use (times per year) multiplied by duration of use (years).

<sup>h</sup> *P*-value for trend was calculated using the mid-point of each category of cumulative dose in times.

<sup>i</sup> *P*-value for trend was calculated using cumulative dose in times as continuous.



|                      |      |                  |                  |     |                  |                  |     |                  |                  |
|----------------------|------|------------------|------------------|-----|------------------|------------------|-----|------------------|------------------|
| Non-user             | 1353 |                  |                  | 565 |                  |                  | 523 |                  |                  |
| <30 years            | 513  | 1 [Reference]    | 1 [Reference]    | 207 | 1 [Reference]    | 1 [Reference]    | 242 | 1 [Reference]    | 1 [Reference]    |
| ≥30 years            | 513  | 1.11 (1.00-1.22) | 1.09 (0.98-1.20) | 205 | 1.22 (1.04-1.43) | 1.24 (1.05-1.45) | 238 | 1.02 (0.88-1.18) | 1.03 (0.88-1.20) |
| Time since first use |      |                  |                  |     |                  |                  |     |                  |                  |
| Non-user             | 1353 |                  |                  | 565 |                  |                  | 523 |                  |                  |
| <30 years            | 726  | 1 [Reference]    | 1 [Reference]    | 307 | 1 [Reference]    | 1 [Reference]    | 326 | 1 [Reference]    | 1 [Reference]    |
| ≥30 years            | 300  | 1.11 (1.01-1.21) | 1.07 (0.97-1.17) | 105 | 1.16 (1.01-1.34) | 1.17 (1.01-1.34) | 154 | 1.09 (0.95-1.26) | 1.06 (0.92-1.22) |

MV: multivariable; HR: hazard ratio; CI: confidence interval; PR: progesterone receptor; BMI: body mass index

\* Hormone receptor status was not available for all the breast cancer cases.

<sup>a</sup> Including participants whose natural hair color was black, dark brown, red, blond, or light brown, or who had missing information on natural hair color.

<sup>b</sup> Dark natural hair color: black and dark brown.

<sup>c</sup> Light natural hair color: red, blond, and light brown.

<sup>d</sup> Participants were excluded from stratified analyses if they had missing information on natural hair color. The number of cases among “dark hair color” and “light hair color” women does not sum to the total number of cases in “any hair color” women due to the inclusion of women with missing hair color information in the “any hair color” group.

<sup>e</sup> Models were adjusted for age and follow-up cycle.

<sup>f</sup> Models were additionally adjusted for race, natural hair color, cumulative average BMI, BMI at age 18, smoking status, pack-years of smoking, alcohol intake, menopausal status, postmenopausal hormone use, oral contraceptive use, adolescent body size, age at menarche, age at first birth, parity, breastfeeding, first-degree family history of breast cancer, history of benign breast disease, and current mammography use. In analyses stratified by natural hair color, models were not further adjusted for natural hair color.

<sup>g</sup> Cumulative dose is the product of average frequency of use (times per year) multiplied by duration of use (years).

<sup>h</sup> *P*-value for trend was calculated using the mid-point of each category of cumulative dose in times.

<sup>i</sup> *P*-value for trend was calculated using cumulative dose in times as continuous.



|                      |      |                  |                  |      |                  |                  |      |                  |                  |
|----------------------|------|------------------|------------------|------|------------------|------------------|------|------------------|------------------|
| Non-user             | 2694 |                  |                  | 1120 |                  |                  | 1136 |                  |                  |
| <30 years            | 983  | 1 [Reference]    | 1 [Reference]    | 348  | 1 [Reference]    | 1 [Reference]    | 513  | 1 [Reference]    | 1 [Reference]    |
| ≥30 years            | 957  | 1.03 (0.96-1.11) | 0.97 (0.90-1.05) | 380  | 1.03 (0.91-1.16) | 1.01 (0.89-1.14) | 430  | 0.98 (0.88-1.08) | 0.95 (0.86-1.06) |
| Time since first use |      |                  |                  |      |                  |                  |      |                  |                  |
| Non-user             | 2694 |                  |                  | 1120 |                  |                  | 1136 |                  |                  |
| <30 years            | 1229 | 1 [Reference]    | 1 [Reference]    | 489  | 1 [Reference]    | 1 [Reference]    | 574  | 1 [Reference]    | 1 [Reference]    |
| ≥30 years            | 711  | 1.05 (0.98-1.12) | 0.98 (0.92-1.05) | 239  | 1.03 (0.92-1.14) | 1.00 (0.90-1.12) | 369  | 0.99 (0.89-1.09) | 0.96 (0.86-1.06) |

MV: multivariable; HR: hazard ratio; CI: confidence interval; ER: estrogen receptor; PR: progesterone receptor; BMI: body mass index

\* Hormone receptor status was not available for all the breast cancer cases.

<sup>a</sup> Including participants whose natural hair color was black, dark brown, red, blond, or light brown, or who had missing information on natural hair color.

<sup>b</sup> Dark natural hair color: black and dark brown.

<sup>c</sup> Light natural hair color: red, blond, and light brown.

<sup>d</sup> Participants were excluded from stratified analyses if they had missing information on natural hair color. The number of cases among “dark hair color” and “light hair color” women does not sum to the total number of cases in “any hair color” women due to the inclusion of women with missing hair color information in the “any hair color” group.

<sup>e</sup> Models were adjusted for age and follow-up cycle.

<sup>f</sup> Models were additionally adjusted for race, natural hair color, cumulative average BMI, BMI at age 18, smoking status, pack-years of smoking, alcohol intake, menopausal status, postmenopausal hormone use, oral contraceptive use, adolescent body size, age at menarche, age at first birth, parity, breastfeeding, first-degree family history of breast cancer, history of benign breast disease, and current mammography use. In analyses stratified by natural hair color, models were not further adjusted for natural hair color.

<sup>g</sup> Cumulative dose is the product of average frequency of use (times per year) multiplied by duration of use (years).

<sup>h</sup> *P*-value for trend was calculated using the mid-point of each category of cumulative dose in times.

<sup>i</sup> *P*-value for trend was calculated using cumulative dose in times as continuous.

**Supplementary Table 12.** Age-adjusted and multivariable (MV)-adjusted hazard ratios (HR) and 95% confidence intervals (CI) of **breast cancer incidence (ER+/PR-)\*** (n=1086) among women in the NHS according to personal use of permanent hair dyes and natural hair color, obtained from Cox models with updated covariate values

| Breast cancer<br>(ER+/PR-)             | Any hair color <sup>a</sup> (n=1086) |                                          |                                         | Dark hair color <sup>b,d</sup> (n=459) |                                          |                                         | Light hair color <sup>c,d</sup> (n=441) |                                          |                                         |
|----------------------------------------|--------------------------------------|------------------------------------------|-----------------------------------------|----------------------------------------|------------------------------------------|-----------------------------------------|-----------------------------------------|------------------------------------------|-----------------------------------------|
|                                        | No. of cases                         | Age-adjusted <sup>e</sup><br>HR (95% CI) | MV-adjusted <sup>f</sup><br>HR (95% CI) | No. of cases                           | Age-adjusted <sup>e</sup><br>HR (95% CI) | MV-adjusted <sup>f</sup><br>HR (95% CI) | No. of cases                            | Age-adjusted <sup>e</sup><br>HR (95% CI) | MV-adjusted <sup>f</sup><br>HR (95% CI) |
| Ever use                               |                                      |                                          |                                         |                                        |                                          |                                         |                                         |                                          |                                         |
| Non-user                               | 607                                  | 1 [Reference]                            | 1 [Reference]                           | 264                                    | 1 [Reference]                            | 1 [Reference]                           | 219                                     | 1 [Reference]                            | 1 [Reference]                           |
| Ever-user                              | 479                                  | 1.13 (1.00-1.27)                         | 1.09 (0.97-1.24)                        | 195                                    | 1.15 (0.95-1.38)                         | 1.11 (0.92-1.35)                        | 222                                     | 1.22 (1.01-1.48)                         | 1.20 (0.99-1.45)                        |
| Duration of use                        |                                      |                                          |                                         |                                        |                                          |                                         |                                         |                                          |                                         |
| Non-user                               | 607                                  | 1 [Reference]                            | 1 [Reference]                           | 264                                    | 1 [Reference]                            | 1 [Reference]                           | 219                                     | 1 [Reference]                            | 1 [Reference]                           |
| <5 years                               | 194                                  | 1.17 (0.99-1.37)                         | 1.16 (0.98-1.37)                        | 82                                     | 1.21 (0.94-1.56)                         | 1.21 (0.93-1.56)                        | 82                                      | 1.24 (0.96-1.60)                         | 1.23 (0.94-1.59)                        |
| 5-9 years                              | 110                                  | 1.11 (0.90-1.36)                         | 1.05 (0.85-1.29)                        | 46                                     | 1.01 (0.73-1.39)                         | 0.97 (0.70-1.35)                        | 52                                      | 1.31 (0.97-1.78)                         | 1.28 (0.93-1.75)                        |
| ≥10 years                              | 175                                  | 1.10 (0.93-1.30)                         | 1.05 (0.88-1.25)                        | 67                                     | 1.18 (0.90-1.55)                         | 1.11 (0.84-1.47)                        | 88                                      | 1.16 (0.90-1.49)                         | 1.13 (0.88-1.46)                        |
| <i>P</i> -value for trend              |                                      | .28                                      | .63                                     |                                        | .30                                      | .58                                     |                                         | .21                                      | .31                                     |
| Frequency of use                       |                                      |                                          |                                         |                                        |                                          |                                         |                                         |                                          |                                         |
| Non-user                               | 607                                  | 1 [Reference]                            | 1 [Reference]                           | 264                                    | 1 [Reference]                            | 1 [Reference]                           | 219                                     | 1 [Reference]                            | 1 [Reference]                           |
| Every ≥5 weeks                         | 228                                  | 1.25 (1.07-1.46)                         | 1.20 (1.02-1.40)                        | 95                                     | 1.25 (0.99-1.59)                         | 1.23 (0.97-1.57)                        | 117                                     | 1.35 (1.08-1.70)                         | 1.32 (1.04-1.66)                        |
| Every 1-4 weeks                        | 251                                  | 1.03 (0.89-1.20)                         | 1.01 (0.87-1.18)                        | 100                                    | 1.06 (0.84-1.34)                         | 1.02 (0.80-1.29)                        | 105                                     | 1.10 (0.87-1.39)                         | 1.09 (0.86-1.39)                        |
| <i>P</i> -value for trend              |                                      | .58                                      | .82                                     |                                        | .52                                      | .82                                     |                                         | .39                                      | .46                                     |
| Cumulative dose <sup>g</sup>           |                                      |                                          |                                         |                                        |                                          |                                         |                                         |                                          |                                         |
| Non-user                               | 607                                  | 1 [Reference]                            | 1 [Reference]                           | 264                                    | 1 [Reference]                            | 1 [Reference]                           | 219                                     | 1 [Reference]                            | 1 [Reference]                           |
| 1-99 times                             | 246                                  | 1.21 (1.04-1.40)                         | 1.18 (1.01-1.37)                        | 99                                     | 1.16 (0.91-1.46)                         | 1.15 (0.90-1.46)                        | 113                                     | 1.31 (1.04-1.65)                         | 1.28 (1.01-1.62)                        |
| 100-199 times                          | 125                                  | 1.14 (0.94-1.39)                         | 1.08 (0.89-1.32)                        | 54                                     | 1.19 (0.89-1.60)                         | 1.14 (0.84-1.54)                        | 58                                      | 1.23 (0.92-1.64)                         | 1.20 (0.89-1.61)                        |
| ≥200 times                             | 108                                  | 0.96 (0.78-1.18)                         | 0.94 (0.76-1.16)                        | 42                                     | 1.08 (0.78-1.50)                         | 1.02 (0.72-1.43)                        | 51                                      | 1.06 (0.78-1.44)                         | 1.06 (0.78-1.45)                        |
| <i>P</i> -value for trend <sup>h</sup> |                                      | .98                                      | .73                                     |                                        | .42                                      | .72                                     |                                         | .57                                      | .60                                     |
| Per 50-time<br>increment               |                                      | 1.00 (0.98-1.02)                         | 1.00 (0.98-1.02)                        |                                        | 1.01 (0.99-1.04)                         | 1.01 (0.99-1.04)                        |                                         | 1.00 (0.97-1.03)                         | 1.00 (0.97-1.03)                        |
| <i>P</i> -value for trend <sup>i</sup> |                                      | .99                                      | .96                                     |                                        | .25                                      | .33                                     |                                         | .89                                      | .90                                     |
| Age at first use                       |                                      |                                          |                                         |                                        |                                          |                                         |                                         |                                          |                                         |

|                      |     |                  |                  |     |                  |                  |     |                  |                  |
|----------------------|-----|------------------|------------------|-----|------------------|------------------|-----|------------------|------------------|
| Non-user             | 607 |                  |                  | 264 |                  |                  | 219 |                  |                  |
| <30 years            | 238 | 1 [Reference]    | 1 [Reference]    | 99  | 1 [Reference]    | 1 [Reference]    | 109 | 1 [Reference]    | 1 [Reference]    |
| ≥30 years            | 241 | 1.19 (1.03-1.38) | 1.18 (1.02-1.38) | 96  | 1.33 (1.05-1.67) | 1.33 (1.05-1.68) | 113 | 1.13 (0.90-1.41) | 1.14 (0.91-1.43) |
| Time since first use |     |                  |                  |     |                  |                  |     |                  |                  |
| Non-user             | 607 |                  |                  | 264 |                  |                  | 219 |                  |                  |
| <30 years            | 337 | 1 [Reference]    | 1 [Reference]    | 142 | 1 [Reference]    | 1 [Reference]    | 155 | 1 [Reference]    | 1 [Reference]    |
| ≥30 years            | 142 | 1.22 (1.07-1.40) | 1.17 (1.03-1.35) | 53  | 1.20 (0.97-1.47) | 1.18 (0.96-1.46) | 67  | 1.34 (1.09-1.64) | 1.29 (1.04-1.59) |

MV: multivariable; HR: hazard ratio; CI: confidence interval; ER: estrogen receptor; PR: progesterone receptor; BMI: body mass index

\* Hormone receptor status was not available for all the breast cancer cases.

<sup>a</sup> Including participants whose natural hair color was black, dark brown, red, blond, or light brown, or who had missing information on natural hair color.

<sup>b</sup> Dark natural hair color: black and dark brown.

<sup>c</sup> Light natural hair color: red, blond, and light brown.

<sup>d</sup> Participants were excluded from stratified analyses if they had missing information on natural hair color. The number of cases among “dark hair color” and “light hair color” women does not sum to the total number of cases in “any hair color” women due to the inclusion of women with missing hair color information in the “any hair color” group.

<sup>e</sup> Models were adjusted for age and follow-up cycle.

<sup>f</sup> Models were additionally adjusted for race, natural hair color, cumulative average BMI, BMI at age 18, smoking status, pack-years of smoking, alcohol intake, menopausal status, postmenopausal hormone use, oral contraceptive use, adolescent body size, age at menarche, age at first birth, parity, breastfeeding, first-degree family history of breast cancer, history of benign breast disease, and current mammography use. In analyses stratified by natural hair color, models were not further adjusted for natural hair color.

<sup>g</sup> Cumulative dose is the product of average frequency of use (times per year) multiplied by duration of use (years).

<sup>h</sup> *P*-value for trend was calculated using the mid-point of each category of cumulative dose in times.

<sup>i</sup> *P*-value for trend was calculated using cumulative dose in times as continuous.

**Supplementary Table 13.** Age-adjusted and multivariable (MV)-adjusted hazard ratios (HR) and 95% confidence intervals (CI) of **breast cancer incidence (ER-/PR-)\*** (n=1287) among women in the NHS according to personal use of permanent hair dyes and natural hair color, obtained from Cox models with updated covariate values

| <b>Breast cancer<br/>(ER-/PR-)</b>     | Any hair color <sup>a</sup> (n=1287) |                                          |                                         | Dark hair color <sup>b,d</sup> (n=517) |                                          |                                         | Light hair color <sup>c,d</sup> (n=561) |                                          |                                         |
|----------------------------------------|--------------------------------------|------------------------------------------|-----------------------------------------|----------------------------------------|------------------------------------------|-----------------------------------------|-----------------------------------------|------------------------------------------|-----------------------------------------|
|                                        | No. of cases                         | Age-adjusted <sup>e</sup><br>HR (95% CI) | MV-adjusted <sup>f</sup><br>HR (95% CI) | No. of cases                           | Age-adjusted <sup>e</sup><br>HR (95% CI) | MV-adjusted <sup>f</sup><br>HR (95% CI) | No. of cases                            | Age-adjusted <sup>e</sup><br>HR (95% CI) | MV-adjusted <sup>f</sup><br>HR (95% CI) |
| Ever use                               |                                      |                                          |                                         |                                        |                                          |                                         |                                         |                                          |                                         |
| Non-user                               | 741                                  | 1 [Reference]                            | 1 [Reference]                           | 300                                    | 1 [Reference]                            | 1 [Reference]                           | 303                                     | 1 [Reference]                            | 1 [Reference]                           |
| Ever-user                              | 546                                  | 1.05 (0.94-1.18)                         | 1.03 (0.92-1.15)                        | 217                                    | 1.12 (0.94-1.34)                         | 1.15 (0.96-1.38)                        | 258                                     | 1.02 (0.86-1.20)                         | 1.02 (0.86-1.21)                        |
| Duration of use                        |                                      |                                          |                                         |                                        |                                          |                                         |                                         |                                          |                                         |
| Non-user                               | 741                                  | 1 [Reference]                            | 1 [Reference]                           | 300                                    | 1 [Reference]                            | 1 [Reference]                           | 303                                     | 1 [Reference]                            | 1 [Reference]                           |
| <5 years                               | 214                                  | 1.04 (0.89-1.21)                         | 1.03 (0.89-1.21)                        | 91                                     | 1.16 (0.91-1.47)                         | 1.18 (0.93-1.50)                        | 92                                      | 0.99 (0.78-1.25)                         | 1.01 (0.79-1.28)                        |
| 5-9 years                              | 127                                  | 1.04 (0.86-1.26)                         | 1.00 (0.82-1.21)                        | 58                                     | 1.14 (0.86-1.52)                         | 1.17 (0.87-1.55)                        | 52                                      | 0.90 (0.67-1.21)                         | 0.87 (0.64-1.18)                        |
| ≥10 years                              | 205                                  | 1.07 (0.92-1.25)                         | 1.04 (0.89-1.22)                        | 68                                     | 1.06 (0.81-1.39)                         | 1.11 (0.84-1.45)                        | 114                                     | 1.11 (0.90-1.38)                         | 1.11 (0.89-1.39)                        |
| <i>P</i> -value for trend              |                                      | .36                                      | .68                                     |                                        | .53                                      | .38                                     |                                         | .42                                      | .49                                     |
| Frequency of use                       |                                      |                                          |                                         |                                        |                                          |                                         |                                         |                                          |                                         |
| Non-user                               | 741                                  | 1 [Reference]                            | 1 [Reference]                           | 300                                    | 1 [Reference]                            | 1 [Reference]                           | 303                                     | 1 [Reference]                            | 1 [Reference]                           |
| Every ≥5 weeks                         | 211                                  | 0.93 (0.80-1.08)                         | 0.89 (0.76-1.04)                        | 89                                     | 1.00 (0.79-1.27)                         | 1.04 (0.82-1.33)                        | 103                                     | 0.85 (0.68-1.06)                         | 0.85 (0.67-1.07)                        |
| Every 1-4 weeks                        | 335                                  | 1.15 (1.01-1.31)                         | 1.14 (1.00-1.30)                        | 128                                    | 1.23 (1.00-1.51)                         | 1.25 (1.01-1.55)                        | 155                                     | 1.18 (0.97-1.43)                         | 1.17 (0.96-1.43)                        |
| <i>P</i> -value for trend              |                                      | .04                                      | .06                                     |                                        | .06                                      | .04                                     |                                         | .11                                      | .12                                     |
| Cumulative dose <sup>g</sup>           |                                      |                                          |                                         |                                        |                                          |                                         |                                         |                                          |                                         |
| Non-user                               | 741                                  | 1 [Reference]                            | 1 [Reference]                           | 300                                    | 1 [Reference]                            | 1 [Reference]                           | 303                                     | 1 [Reference]                            | 1 [Reference]                           |
| 1-99 times                             | 251                                  | 0.99 (0.86-1.14)                         | 0.97 (0.83-1.12)                        | 113                                    | 1.15 (0.92-1.43)                         | 1.18 (0.94-1.47)                        | 110                                     | 0.91 (0.73-1.13)                         | 0.91 (0.72-1.14)                        |
| 100-199 times                          | 126                                  | 0.94 (0.78-1.14)                         | 0.91 (0.75-1.10)                        | 53                                     | 1.00 (0.74-1.34)                         | 1.00 (0.74-1.36)                        | 57                                      | 0.86 (0.64-1.14)                         | 0.85 (0.64-1.14)                        |
| ≥200 times                             | 169                                  | 1.29 (1.09-1.52)                         | 1.28 (1.08-1.52)                        | 51                                     | 1.22 (0.90-1.66)                         | 1.28 (0.94-1.73)                        | 91                                      | 1.39 (1.09-1.76)                         | 1.38 (1.09-1.76)                        |
| <i>P</i> -value for trend <sup>h</sup> |                                      | .01                                      | .03                                     |                                        | .26                                      | .18                                     |                                         | .02                                      | .03                                     |
| Per 50-time<br>increment               |                                      | 1.02 (1.00-1.03)                         | 1.02 (1.01-1.03)                        |                                        | 1.01 (0.99-1.04)                         | 1.02 (0.99-1.04)                        |                                         | 1.02 (1.00-1.04)                         | 1.02 (1.00-1.05)                        |
| <i>P</i> -value for trend <sup>i</sup> |                                      | .01                                      | .006                                    |                                        | .31                                      | .19                                     |                                         | .02                                      | .02                                     |
| Age at first use                       |                                      |                                          |                                         |                                        |                                          |                                         |                                         |                                          |                                         |

|                      |     |                  |                  |     |                  |                  |     |                  |                  |
|----------------------|-----|------------------|------------------|-----|------------------|------------------|-----|------------------|------------------|
| Non-user             | 741 |                  |                  | 300 |                  |                  | 303 |                  |                  |
| <30 years            | 274 | 1 [Reference]    | 1 [Reference]    | 108 | 1 [Reference]    | 1 [Reference]    | 133 | 1 [Reference]    | 1 [Reference]    |
| ≥30 years            | 272 | 1.04 (0.91-1.19) | 1.01 (0.88-1.16) | 109 | 1.14 (0.92-1.42) | 1.16 (0.93-1.45) | 125 | 0.94 (0.77-1.15) | 0.95 (0.77-1.16) |
| Time since first use |     |                  |                  |     |                  |                  |     |                  |                  |
| Non-user             | 741 |                  |                  | 300 |                  |                  | 303 |                  |                  |
| <30 years            | 388 | 1 [Reference]    | 1 [Reference]    | 165 | 1 [Reference]    | 1 [Reference]    | 171 | 1 [Reference]    | 1 [Reference]    |
| ≥30 years            | 158 | 1.03 (0.91-1.16) | 0.99 (0.87-1.12) | 52  | 1.14 (0.94-1.38) | 1.18 (0.97-1.43) | 87  | 0.94 (0.78-1.13) | 0.91 (0.75-1.10) |

MV: multivariable; HR: hazard ratio; CI: confidence interval; ER: estrogen receptor; PR: progesterone receptor; BMI: body mass index

\* Hormone receptor status was not available for all the breast cancer cases.

<sup>a</sup> Including participants whose natural hair color was black, dark brown, red, blond, or light brown, or who had missing information on natural hair color.

<sup>b</sup> Dark natural hair color: black and dark brown.

<sup>c</sup> Light natural hair color: red, blond, and light brown.

<sup>d</sup> Participants were excluded from stratified analyses if they had missing information on natural hair color. The number of cases among “dark hair color” and “light hair color” women does not sum to the total number of cases in “any hair color” women due to the inclusion of women with missing hair color information in the “any hair color” group.

<sup>e</sup> Models were adjusted for age and follow-up cycle.

<sup>f</sup> Models were additionally adjusted for race, natural hair color, cumulative average BMI, BMI at age 18, smoking status, pack-years of smoking, alcohol intake, menopausal status, postmenopausal hormone use, oral contraceptive use, adolescent body size, age at menarche, age at first birth, parity, breastfeeding, first-degree family history of breast cancer, history of benign breast disease, and current mammography use. In analyses stratified by natural hair color, models were not further adjusted for natural hair color.

<sup>g</sup> Cumulative dose is the product of average frequency of use (times per year) multiplied by duration of use (years).

<sup>h</sup> *P*-value for trend was calculated using the mid-point of each category of cumulative dose in times.

<sup>i</sup> *P*-value for trend was calculated using cumulative dose in times as continuous.



|                      |     |                  |                  |     |                  |                  |     |                  |                  |
|----------------------|-----|------------------|------------------|-----|------------------|------------------|-----|------------------|------------------|
| Non-user             | 687 |                  |                  | 256 |                  |                  | 267 |                  |                  |
| <30 years            | 294 | 1 [Reference]    | 1 [Reference]    | 106 | 1 [Reference]    | 1 [Reference]    | 128 | 1 [Reference]    | 1 [Reference]    |
| ≥30 years            | 234 | 0.81 (0.67-0.93) | 0.80 (0.66-0.97) | 87  | 0.92 (0.67-1.28) | 0.95 (0.68-1.32) | 114 | 0.72 (0.54-0.96) | 0.72 (0.54-0.97) |
| Time since first use |     |                  |                  |     |                  |                  |     |                  |                  |
| Non-user             | 687 |                  |                  | 256 |                  |                  | 267 |                  |                  |
| <30 years            | 187 | 1 [Reference]    | 1 [Reference]    | 50  | 1 [Reference]    | 1 [Reference]    | 110 | 1 [Reference]    | 1 [Reference]    |
| ≥30 years            | 341 | 1.00 (0.80-1.24) | 1.03 (0.83-1.29) | 143 | 1.29 (0.87-1.90) | 1.29 (0.87-1.92) | 132 | 0.76 (0.55-1.03) | 0.77 (0.56-1.05) |

MV: multivariable; HR: hazard ratio; CI: confidence interval; BMI: body mass index

<sup>a</sup> Including participants whose natural hair color was black, dark brown, red, blond, or light brown, or who had missing information on natural hair color.

<sup>b</sup> Dark natural hair color: black and dark brown.

<sup>c</sup> Light natural hair color: red, blond, and light brown.

<sup>d</sup> Participants were excluded from stratified analyses if they had missing information on natural hair color. The number of cases among “dark hair color” and “light hair color” women does not sum to the total number of cases in “any hair color” women due to the inclusion of women with missing hair color information in the “any hair color” group.

<sup>e</sup> Models were adjusted for age and follow-up cycle.

<sup>f</sup> Models were additionally adjusted for race, natural hair color, cumulative average BMI, BMI at age 18, smoking status, pack-years of smoking, alcohol intake, menopausal status, postmenopausal hormone use, age at menarche, oral contraceptive use, and parity. In analyses stratified by natural hair color, models were not further adjusted for natural hair color.

<sup>g</sup> Cumulative dose is the product of average frequency of use (times per year) multiplied by duration of use (years).

<sup>h</sup> *P*-value for trend was calculated using the mid-point of each category of cumulative dose in times.

<sup>i</sup> *P*-value for trend was calculated using cumulative dose in times as continuous.



|                      |      |                  |                  |     |                  |                  |     |                  |                  |
|----------------------|------|------------------|------------------|-----|------------------|------------------|-----|------------------|------------------|
| Non-user             | 1378 |                  |                  | 511 |                  |                  | 534 |                  |                  |
| <30 years            | 576  | 1 [Reference]    | 1 [Reference]    | 200 | 1 [Reference]    | 1 [Reference]    | 253 | 1 [Reference]    | 1 [Reference]    |
| ≥30 years            | 440  | 1.07 (0.93-1.22) | 1.05 (0.92-1.21) | 147 | 1.13 (0.89-1.42) | 1.15 (0.91-1.46) | 204 | 0.92 (0.75-1.13) | 0.89 (0.72-1.09) |
| Time since first use |      |                  |                  |     |                  |                  |     |                  |                  |
| Non-user             | 1378 |                  |                  | 511 |                  |                  | 534 |                  |                  |
| <30 years            | 402  | 1 [Reference]    | 1 [Reference]    | 132 | 1 [Reference]    | 1 [Reference]    | 200 | 1 [Reference]    | 1 [Reference]    |
| ≥30 years            | 614  | 0.92 (0.79-1.07) | 0.94 (0.81-1.10) | 215 | 0.86 (0.66-1.12) | 0.86 (0.66-1.13) | 257 | 0.84 (0.67-1.05) | 0.99 (0.62-1.57) |

MV: multivariable; HR: hazard ratio; CI: confidence interval; BMI: body mass index; NSAIDs: nonsteroidal anti-inflammatory drugs

<sup>a</sup> Including participants whose natural hair color was black, dark brown, red, blond, or light brown, or who had missing information on natural hair color.

<sup>b</sup> Dark natural hair color: black and dark brown.

<sup>c</sup> Light natural hair color: red, blond, and light brown.

<sup>d</sup> Participants were excluded from stratified analyses if they had missing information on natural hair color. The number of cases among “dark hair color” and “light hair color” women does not sum to the total number of cases in “any hair color” women due to the inclusion of women with missing hair color information in the “any hair color” group.

<sup>e</sup> Models were adjusted for age and follow-up cycle.

<sup>f</sup> Models were additionally adjusted for race, natural hair color, cumulative average BMI, BMI at age 18, smoking status, pack-years of smoking, alcohol intake, physical activity, menopausal status, postmenopausal hormone use, family history of colorectal cancer, history of diabetes mellitus, screening colonoscopy or sigmoidoscopy in the previous 2 years, regular use of aspirin, regular use of non-aspirin NSAIDs, multivitamin use, total calories intake, red or processed meat intake, and intake of fiber, folate, calcium, and vitamin D. In analyses stratified by natural hair color, models were not further adjusted for natural hair color.

<sup>g</sup> Cumulative dose is the product of average frequency of use (times per year) multiplied by duration of use (years).

<sup>h</sup> *P*-value for trend was calculated using the mid-point of each category of cumulative dose in times.

<sup>i</sup> *P*-value for trend was calculated using cumulative dose in times as continuous.



|                      |     |                  |                  |     |                  |                  |     |                  |                  |
|----------------------|-----|------------------|------------------|-----|------------------|------------------|-----|------------------|------------------|
| Non-user             | 333 |                  |                  | 129 |                  |                  | 133 |                  |                  |
| <30 years            | 153 | 1 [Reference]    | 1 [Reference]    | 59  | 1 [Reference]    | 1 [Reference]    | 68  | 1 [Reference]    | 1 [Reference]    |
| ≥30 years            | 110 | 0.84 (0.64-1.10) | 0.81 (0.62-1.08) | 39  | 0.79 (0.50-1.24) | 0.79 (0.50-1.24) | 59  | 0.87 (0.58-1.28) | 0.79 (0.53-1.18) |
| Time since first use |     |                  |                  |     |                  |                  |     |                  |                  |
| Non-user             | 333 |                  |                  | 129 |                  |                  | 133 |                  |                  |
| <30 years            | 116 | 1 [Reference]    | 1 [Reference]    | 34  | 1 [Reference]    | 1 [Reference]    | 65  | 1 [Reference]    | 1 [Reference]    |
| ≥30 years            | 147 | 1.02 (0.77-1.37) | 1.04 (0.78-1.40) | 64  | 1.19 (0.72-1.96) | 1.26 (0.76-2.09) | 62  | 0.93 (0.62-1.41) | 0.96 (0.63-1.44) |

MV: multivariable; HR: hazard ratio; CI: confidence interval; BMI: body mass index

<sup>a</sup> Including participants whose natural hair color was black, dark brown, red, blond, or light brown, or who had missing information on natural hair color.

<sup>b</sup> Dark natural hair color: black and dark brown.

<sup>c</sup> Light natural hair color: red, blond, and light brown.

<sup>d</sup> Participants were excluded from stratified analyses if they had missing information on natural hair color. The number of cases among “dark hair color” and “light hair color” women does not sum to the total number of cases in “any hair color” women due to the inclusion of women with missing hair color information in the “any hair color” group.

<sup>e</sup> Models were adjusted for age and follow-up cycle.

<sup>f</sup> Models were additionally adjusted for race, natural hair color, cumulative average BMI, BMI at age 18, smoking status, pack-years of smoking, alcohol intake, and total fluid intake.

In analyses stratified by natural hair color, models were not further adjusted for natural hair color.

<sup>g</sup> Cumulative dose is the product of average frequency of use (times per year) multiplied by duration of use (years).

<sup>h</sup> *P*-value for trend was calculated using the mid-point of each category of cumulative dose in times.

<sup>i</sup> *P*-value for trend was calculated using cumulative dose in times as continuous.

**Supplementary Table 17.** Age-adjusted and multivariable (MV)-adjusted hazard ratios (HR) and 95% confidence intervals (CI) of **kidney cancer incidence** (n=477) among women in the NHS according to personal use of permanent hair dyes and natural hair color, obtained from Cox models with updated covariate values

| Kidney cancer                          | Any hair color <sup>a</sup> (n=477) |                                          |                                         | Dark hair color <sup>b,d</sup> (n=184) |                                          |                                         | Light hair color <sup>c,d</sup> (n=190) |                                          |                                         |
|----------------------------------------|-------------------------------------|------------------------------------------|-----------------------------------------|----------------------------------------|------------------------------------------|-----------------------------------------|-----------------------------------------|------------------------------------------|-----------------------------------------|
|                                        | No. of cases                        | Age-adjusted <sup>e</sup><br>HR (95% CI) | MV-adjusted <sup>f</sup><br>HR (95% CI) | No. of cases                           | Age-adjusted <sup>e</sup><br>HR (95% CI) | MV-adjusted <sup>f</sup><br>HR (95% CI) | No. of cases                            | Age-adjusted <sup>e</sup><br>HR (95% CI) | MV-adjusted <sup>f</sup><br>HR (95% CI) |
| Ever use                               |                                     |                                          |                                         |                                        |                                          |                                         |                                         |                                          |                                         |
| Non-user                               | 278                                 | 1 [Reference]                            | 1 [Reference]                           | 113                                    | 1 [Reference]                            | 1 [Reference]                           | 97                                      | 1 [Reference]                            | 1 [Reference]                           |
| Ever-user                              | 199                                 | 1.03 (0.86-1.24)                         | 1.03 (0.85-1.23)                        | 71                                     | 0.99 (0.73-1.33)                         | 0.99 (0.73-1.34)                        | 93                                      | 1.12 (0.84-1.50)                         | 1.13 (0.84-1.51)                        |
| Duration of use                        |                                     |                                          |                                         |                                        |                                          |                                         |                                         |                                          |                                         |
| Non-user                               | 278                                 | 1 [Reference]                            | 1 [Reference]                           | 113                                    | 1 [Reference]                            | 1 [Reference]                           | 97                                      | 1 [Reference]                            | 1 [Reference]                           |
| <5 years                               | 83                                  | 1.08 (0.85-1.38)                         | 1.06 (0.83-1.36)                        | 31                                     | 1.04 (0.70-1.56)                         | 1.04 (0.70-1.56)                        | 41                                      | 1.38 (0.96-2.00)                         | 1.39 (0.95-2.01)                        |
| 5-9 years                              | 42                                  | 0.94 (0.68-1.30)                         | 0.93 (0.67-1.29)                        | 15                                     | 0.80 (0.46-1.38)                         | 0.79 (0.46-1.36)                        | 17                                      | 0.94 (0.56-1.58)                         | 0.95 (0.56-1.59)                        |
| ≥10 years                              | 74                                  | 1.03 (0.80-1.34)                         | 1.04 (0.80-1.35)                        | 25                                     | 1.06 (0.68-1.65)                         | 1.08 (0.69-1.68)                        | 35                                      | 1.00 (0.67-1.48)                         | 1.00 (0.67-1.50)                        |
| <i>P</i> -value for trend              |                                     | .92                                      | .89                                     |                                        | 1.00                                     | .96                                     |                                         | .77                                      | .80                                     |
| Frequency of use                       |                                     |                                          |                                         |                                        |                                          |                                         |                                         |                                          |                                         |
| Non-user                               | 278                                 | 1 [Reference]                            | 1 [Reference]                           | 113                                    | 1 [Reference]                            | 1 [Reference]                           | 97                                      | 1 [Reference]                            | 1 [Reference]                           |
| Every ≥5 weeks                         | 83                                  | 1.00 (0.79-1.28)                         | 0.98 (0.76-1.26)                        | 34                                     | 1.06 (0.72-1.55)                         | 1.03 (0.70-1.52)                        | 42                                      | 1.08 (0.75-1.55)                         | 1.07 (0.74-1.55)                        |
| Every 1-4 weeks                        | 116                                 | 1.05 (0.85-1.31)                         | 1.06 (0.85-1.32)                        | 37                                     | 0.93 (0.64-1.35)                         | 0.95 (0.65-1.39)                        | 51                                      | 1.17 (0.83-1.65)                         | 1.18 (0.84-1.68)                        |
| <i>P</i> -value for trend              |                                     | .64                                      | .61                                     |                                        | .73                                      | .81                                     |                                         | .38                                      | .34                                     |
| Cumulative dose <sup>g</sup>           |                                     |                                          |                                         |                                        |                                          |                                         |                                         |                                          |                                         |
| Non-user                               | 278                                 | 1 [Reference]                            | 1 [Reference]                           | 113                                    | 1 [Reference]                            | 1 [Reference]                           | 97                                      | 1 [Reference]                            | 1 [Reference]                           |
| 1-99 times                             | 101                                 | 1.09 (0.86-1.37)                         | 1.06 (0.84-1.33)                        | 38                                     | 1.05 (0.73-1.53)                         | 1.02 (0.70-1.49)                        | 47                                      | 1.23 (0.86-1.74)                         | 1.22 (0.85-1.74)                        |
| 100-199 times                          | 50                                  | 1.03 (0.76-1.39)                         | 1.02 (0.76-1.39)                        | 22                                     | 1.14 (0.72-1.81)                         | 1.14 (0.72-1.82)                        | 20                                      | 0.93 (0.58-1.52)                         | 0.95 (0.58-1.54)                        |
| ≥200 times                             | 48                                  | 0.94 (0.69-1.27)                         | 0.97 (0.71-1.32)                        | 11                                     | 0.66 (0.35-1.24)                         | 0.71 (0.38-1.33)                        | 26                                      | 1.13 (0.72-1.77)                         | 1.15 (0.74-1.81)                        |
| <i>P</i> -value for trend <sup>h</sup> |                                     | .74                                      | .88                                     |                                        | .36                                      | .48                                     |                                         | .76                                      | .70                                     |
| Per 50-time increment                  |                                     | 0.98 (0.95-1.02)                         | 0.99 (0.95-1.02)                        |                                        | 0.96 (0.89-1.03)                         | 0.96 (0.90-1.04)                        |                                         | 0.98 (0.93-1.04)                         | 0.99 (0.93-1.04)                        |
| <i>P</i> -value for trend <sup>i</sup> |                                     | .36                                      | .50                                     |                                        | .25                                      | .33                                     |                                         | .52                                      | .59                                     |
| Age at first use                       |                                     |                                          |                                         |                                        |                                          |                                         |                                         |                                          |                                         |

|                      |     |                  |                  |     |                  |                  |    |                  |                  |
|----------------------|-----|------------------|------------------|-----|------------------|------------------|----|------------------|------------------|
| Non-user             | 278 |                  |                  | 113 |                  |                  | 97 |                  |                  |
| <30 years            | 98  | 1 [Reference]    | 1 [Reference]    | 38  | 1 [Reference]    | 1 [Reference]    | 40 | 1 [Reference]    | 1 [Reference]    |
| ≥30 years            | 101 | 1.10 (0.80-1.50) | 1.08 (0.79-1.48) | 33  | 0.84 (0.50-1.42) | 0.87 (0.51-1.48) | 53 | 1.35 (0.85-2.14) | 1.34 (0.84-2.14) |
| Time since first use |     |                  |                  |     |                  |                  |    |                  |                  |
| Non-user             | 278 |                  |                  | 113 |                  |                  | 97 |                  |                  |
| <30 years            | 87  | 1 [Reference]    | 1 [Reference]    | 25  | 1 [Reference]    | 1 [Reference]    | 44 | 1 [Reference]    | 1 [Reference]    |
| ≥30 years            | 112 | 1.15 (0.83-1.59) | 1.16 (0.84-1.62) | 46  | 1.21 (0.69-2.11) | 1.29 (0.73-2.28) | 49 | 1.13 (0.70-1.82) | 1.21 (0.75-1.95) |

MV: multivariable; HR: hazard ratio; CI: confidence interval; BMI: body mass index

<sup>a</sup> Including participants whose natural hair color was black, dark brown, red, blond, or light brown, or who had missing information on natural hair color.

<sup>b</sup> Dark natural hair color: black and dark brown.

<sup>c</sup> Light natural hair color: red, blond, and light brown.

<sup>d</sup> Participants were excluded from stratified analyses if they had missing information on natural hair color. The number of cases among “dark hair color” and “light hair color” women does not sum to the total number of cases in “any hair color” women due to the inclusion of women with missing hair color information in the “any hair color” group.

<sup>e</sup> Models were adjusted for age and follow-up cycle.

<sup>f</sup> Models were additionally adjusted for race, natural hair color, cumulative average BMI, BMI at age 18, smoking status, pack-years of smoking, and alcohol intake. In analyses stratified by natural hair color, models were not further adjusted for natural hair color.

<sup>g</sup> Cumulative dose is the product of average frequency of use (times per year) multiplied by duration of use (years).

<sup>h</sup> *P*-value for trend was calculated using the mid-point of each category of cumulative dose in times.

<sup>i</sup> *P*-value for trend was calculated using cumulative dose in times as continuous.



|                      |      |                  |                  |     |                  |                  |     |                  |                  |
|----------------------|------|------------------|------------------|-----|------------------|------------------|-----|------------------|------------------|
| Non-user             | 1509 |                  |                  | 568 |                  |                  | 525 |                  |                  |
| <30 years            | 639  | 1 [Reference]    | 1 [Reference]    | 206 | 1 [Reference]    | 1 [Reference]    | 268 | 1 [Reference]    | 1 [Reference]    |
| ≥30 years            | 475  | 1.01 (0.88-1.15) | 0.97 (0.85-1.11) | 134 | 0.99 (0.78-1.26) | 1.02 (0.80-1.31) | 224 | 0.92 (0.75-1.12) | 0.88 (0.72-1.08) |
| Time since first use |      |                  |                  |     |                  |                  |     |                  |                  |
| Non-user             | 1509 |                  |                  | 568 |                  |                  | 525 |                  |                  |
| <30 years            | 569  | 1 [Reference]    | 1 [Reference]    | 164 | 1 [Reference]    | 1 [Reference]    | 283 | 1 [Reference]    | 1 [Reference]    |
| ≥30 years            | 545  | 0.80 (0.69-0.92) | 0.91 (0.79-1.04) | 176 | 0.78 (0.61-1.00) | 0.88 (0.68-1.14) | 209 | 0.65 (0.53-0.80) | 0.74 (0.60-0.91) |

MV: multivariable; HR: hazard ratio; CI: confidence interval; BMI: body mass index

<sup>a</sup> Including participants whose natural hair color was black, dark brown, red, blond, or light brown, or who had missing information on natural hair color.

<sup>b</sup> Dark natural hair color: black and dark brown.

<sup>c</sup> Light natural hair color: red, blond, and light brown.

<sup>d</sup> Participants were excluded from stratified analyses if they had missing information on natural hair color. The number of cases among “dark hair color” and “light hair color” women does not sum to the total number of cases in “any hair color” women due to the inclusion of women with missing hair color information in the “any hair color” group.

<sup>e</sup> Models were adjusted for age and follow-up cycle.

<sup>f</sup> Models were additionally adjusted for race, natural hair color, cumulative average BMI, BMI at age 18, smoking status, pack-years of smoking, and alcohol intake. In analyses stratified by natural hair color, models were not further adjusted for natural hair color.

<sup>g</sup> Cumulative dose is the product of average frequency of use (times per year) multiplied by duration of use (years).

<sup>h</sup> *P*-value for trend was calculated using the mid-point of each category of cumulative dose in times.

<sup>i</sup> *P*-value for trend was calculated using cumulative dose in times as continuous.



|                      |     |                  |                  |    |                  |                  |    |                  |                  |
|----------------------|-----|------------------|------------------|----|------------------|------------------|----|------------------|------------------|
| Non-user             | 186 |                  |                  | 63 |                  |                  | 69 |                  |                  |
| <30 years            | 57  | 1 [Reference]    | 1 [Reference]    | 22 | 1 [Reference]    | 1 [Reference]    | 18 | 1 [Reference]    | 1 [Reference]    |
| ≥30 years            | 34  | 0.86 (0.54-1.36) | 0.87 (0.55-1.40) | 15 | 0.90 (0.44-1.84) | 0.86 (0.42-1.78) | 13 | 0.89 (0.41-1.96) | 0.81 (0.36-1.80) |
| Time since first use |     |                  |                  |    |                  |                  |    |                  |                  |
| Non-user             | 186 |                  |                  | 63 |                  |                  | 69 |                  |                  |
| <30 years            | 28  | 1 [Reference]    | 1 [Reference]    | 10 | 1 [Reference]    | 1 [Reference]    | 11 | 1 [Reference]    | 1 [Reference]    |
| ≥30 years            | 63  | 1.36 (0.79-2.35) | 1.39 (0.80-1.41) | 27 | 1.78 (0.73-4.34) | 1.73 (0.70-4.29) | 20 | 1.27 (0.54-2.98) | 1.50 (0.61-1.71) |

MV: multivariable; HR: hazard ratio; CI: confidence interval; BMI: body mass index

<sup>a</sup> Including participants whose natural hair color was black, dark brown, red, blond, or light brown, or who had missing information on natural hair color.

<sup>b</sup> Dark natural hair color: black and dark brown.

<sup>c</sup> Light natural hair color: red, blond, and light brown.

<sup>d</sup> Participants were excluded from stratified analyses if they had missing information on natural hair color. The number of cases among “dark hair color” and “light hair color” women does not sum to the total number of cases in “any hair color” women due to the inclusion of women with missing hair color information in the “any hair color” group.

<sup>e</sup> Models were adjusted for age and follow-up cycle.

<sup>f</sup> Models were additionally adjusted for race, natural hair color, cumulative average BMI, BMI at age 18, smoking status, pack-years of smoking, and alcohol intake. In analyses stratified by natural hair color, models were not further adjusted for natural hair color.

<sup>g</sup> Cumulative dose is the product of average frequency of use (times per year) multiplied by duration of use (years).

<sup>h</sup> *P*-value for trend was calculated using the mid-point of each category of cumulative dose in times.

<sup>i</sup> *P*-value for trend was calculated using cumulative dose in times as continuous.



|                      |      |                  |                  |     |                  |                  |     |                  |                  |
|----------------------|------|------------------|------------------|-----|------------------|------------------|-----|------------------|------------------|
| Non-user             | 1067 |                  |                  | 437 |                  |                  | 402 |                  |                  |
| <30 years            | 412  | 1 [Reference]    | 1 [Reference]    | 177 | 1 [Reference]    | 1 [Reference]    | 158 | 1 [Reference]    | 1 [Reference]    |
| ≥30 years            | 328  | 0.90 (0.76-1.05) | 0.90 (0.76-1.06) | 127 | 0.89 (0.68-1.15) | 0.88 (0.68-1.14) | 149 | 0.87 (0.67-1.12) | 0.87 (0.67-1.13) |
| Time since first use |      |                  |                  |     |                  |                  |     |                  |                  |
| Non-user             | 1067 |                  |                  | 437 |                  |                  | 402 |                  |                  |
| <30 years            | 320  | 1 [Reference]    | 1 [Reference]    | 126 | 1 [Reference]    | 1 [Reference]    | 134 | 1 [Reference]    | 1 [Reference]    |
| ≥30 years            | 420  | 0.99 (0.84-1.18) | 0.97 (0.82-1.16) | 178 | 0.99 (0.75-1.30) | 0.99 (0.75-1.30) | 173 | 1.00 (0.77-1.30) | 1.00 (0.77-1.30) |

MV: multivariable; HR: hazard ratio; CI: confidence interval; BMI: body mass index

<sup>a</sup> Including participants whose natural hair color was black, dark brown, red, blond, or light brown, or who had missing information on natural hair color.

<sup>b</sup> Dark natural hair color: black and dark brown.

<sup>c</sup> Light natural hair color: red, blond, and light brown.

<sup>d</sup> Participants were excluded from stratified analyses if they had missing information on natural hair color. The number of cases among “dark hair color” and “light hair color” women does not sum to the total number of cases in “any hair color” women due to the inclusion of women with missing hair color information in the “any hair color” group.

<sup>e</sup> Models were adjusted for age and follow-up cycle.

<sup>f</sup> Models were additionally adjusted for race, natural hair color, cumulative average BMI, BMI at age 18, smoking status, pack-years of smoking, and alcohol intake. In analyses stratified by natural hair color, models were not further adjusted for natural hair color.

<sup>g</sup> Cumulative dose is the product of average frequency of use (times per year) multiplied by duration of use (years).

<sup>h</sup> *P*-value for trend was calculated using the mid-point of each category of cumulative dose in times.

<sup>i</sup> *P*-value for trend was calculated using cumulative dose in times as continuous.

**Supplementary Table 21.** Age-adjusted and multivariable (MV)-adjusted hazard ratios (HR) and 95% confidence intervals (CI) of **overall non-Hodgkin lymphoma incidence** (n=1277) among women in the NHS according to personal use of permanent hair dyes and natural hair color, obtained from Cox models with updated covariate values

| All non-Hodgkin lymphomas              | Any hair color <sup>a</sup> (n=1277) |                                          |                                         | Dark hair color <sup>b,d</sup> (n=529) |                                          |                                         | Light hair color <sup>c,d</sup> (n=510) |                                          |                                         |
|----------------------------------------|--------------------------------------|------------------------------------------|-----------------------------------------|----------------------------------------|------------------------------------------|-----------------------------------------|-----------------------------------------|------------------------------------------|-----------------------------------------|
|                                        | No. of cases                         | Age-adjusted <sup>e</sup><br>HR (95% CI) | MV-adjusted <sup>f</sup><br>HR (95% CI) | No. of cases                           | Age-adjusted <sup>e</sup><br>HR (95% CI) | MV-adjusted <sup>f</sup><br>HR (95% CI) | No. of cases                            | Age-adjusted <sup>e</sup><br>HR (95% CI) | MV-adjusted <sup>f</sup><br>HR (95% CI) |
| Ever use                               |                                      |                                          |                                         |                                        |                                          |                                         |                                         |                                          |                                         |
| Non-user                               | 771                                  | 1 [Reference]                            | 1 [Reference]                           | 324                                    | 1 [Reference]                            | 1 [Reference]                           | 292                                     | 1 [Reference]                            | 1 [Reference]                           |
| Ever-user                              | 506                                  | 0.95 (0.84-1.06)                         | 0.94 (0.84-1.05)                        | 205                                    | 0.99 (0.83-1.18)                         | 0.99 (0.83-1.18)                        | 218                                     | 0.90 (0.76-1.08)                         | 0.92 (0.77-1.09)                        |
| Duration of use                        |                                      |                                          |                                         |                                        |                                          |                                         |                                         |                                          |                                         |
| Non-user                               | 771                                  | 1 [Reference]                            | 1 [Reference]                           | 324                                    | 1 [Reference]                            | 1 [Reference]                           | 292                                     | 1 [Reference]                            | 1 [Reference]                           |
| <5 years                               | 197                                  | 0.95 (0.81-1.11)                         | 0.95 (0.81-1.11)                        | 79                                     | 0.95 (0.74-1.22)                         | 0.95 (0.74-1.21)                        | 86                                      | 0.99 (0.78-1.26)                         | 1.01 (0.79-1.28)                        |
| 5-9 years                              | 114                                  | 0.91 (0.75-1.11)                         | 0.90 (0.74-1.09)                        | 56                                     | 1.06 (0.80-1.41)                         | 1.05 (0.79-1.40)                        | 42                                      | 0.77 (0.56-1.07)                         | 0.78 (0.56-1.08)                        |
| ≥10 years                              | 195                                  | 0.96 (0.82-1.13)                         | 0.95 (0.81-1.12)                        | 70                                     | 0.99 (0.76-1.28)                         | 0.98 (0.76-1.28)                        | 90                                      | 0.89 (0.70-1.13)                         | 0.91 (0.71-1.15)                        |
| <i>P</i> -value for trend              |                                      | .53                                      | .45                                     |                                        | .96                                      | .99                                     |                                         | .22                                      | .28                                     |
| Frequency of use                       |                                      |                                          |                                         |                                        |                                          |                                         |                                         |                                          |                                         |
| Non-user                               | 771                                  | 1 [Reference]                            | 1 [Reference]                           | 324                                    | 1 [Reference]                            | 1 [Reference]                           | 292                                     | 1 [Reference]                            | 1 [Reference]                           |
| Every ≥5 weeks                         | 233                                  | 1.02 (0.88-1.18)                         | 0.99 (0.85-1.15)                        | 95                                     | 1.03 (0.82-1.30)                         | 1.01 (0.80-1.28)                        | 105                                     | 0.91 (0.73-1.14)                         | 0.93 (0.74-1.16)                        |
| Every 1-4 weeks                        | 273                                  | 0.89 (0.78-1.02)                         | 0.90 (0.78-1.03)                        | 110                                    | 0.96 (0.77-1.19)                         | 0.96 (0.77-1.20)                        | 113                                     | 0.89 (0.72-1.11)                         | 0.91 (0.73-1.13)                        |
| <i>P</i> -value for trend              |                                      | .11                                      | .14                                     |                                        | .74                                      | .75                                     |                                         | .30                                      | .37                                     |
| Cumulative dose <sup>g</sup>           |                                      |                                          |                                         |                                        |                                          |                                         |                                         |                                          |                                         |
| Non-user                               | 771                                  | 1 [Reference]                            | 1 [Reference]                           | 324                                    | 1 [Reference]                            | 1 [Reference]                           | 292                                     | 1 [Reference]                            | 1 [Reference]                           |
| 1-99 times                             | 253                                  | 1.00 (0.86-1.15)                         | 0.98 (0.85-1.13)                        | 111                                    | 1.10 (0.88-1.36)                         | 1.09 (0.87-1.35)                        | 102                                     | 0.89 (0.71-1.12)                         | 0.90 (0.72-1.14)                        |
| 100-199 times                          | 113                                  | 0.82 (0.68-1.00)                         | 0.81 (0.66-0.99)                        | 40                                     | 0.69 (0.50-0.96)                         | 0.69 (0.49-0.96)                        | 61                                      | 0.97 (0.74-1.28)                         | 0.99 (0.75-1.31)                        |
| ≥200 times                             | 140                                  | 0.97 (0.81-1.17)                         | 0.98 (0.82-1.18)                        | 54                                     | 1.13 (0.84-1.51)                         | 1.13 (0.84-1.52)                        | 55                                      | 0.85 (0.64-1.13)                         | 0.86 (0.64-1.15)                        |
| <i>P</i> -value for trend <sup>h</sup> |                                      | .36                                      | .40                                     |                                        | .91                                      | .92                                     |                                         | .31                                      | .39                                     |
| Per 50-time increment                  |                                      | 1.00 (0.98-1.02)                         | 1.00 (0.98-1.02)                        |                                        | 0.99 (0.96-1.03)                         | 0.99 (0.96-1.03)                        |                                         | 1.00 (0.97-1.03)                         | 1.00 (0.97-1.03)                        |
| <i>P</i> -value for trend <sup>i</sup> |                                      | .78                                      | .95                                     |                                        | .70                                      | .72                                     |                                         | .98                                      | .93                                     |
| Age at first use                       |                                      |                                          |                                         |                                        |                                          |                                         |                                         |                                          |                                         |

|                      |     |                  |                  |     |                  |                  |     |                  |                  |
|----------------------|-----|------------------|------------------|-----|------------------|------------------|-----|------------------|------------------|
| Non-user             | 771 |                  |                  | 324 |                  |                  | 292 |                  |                  |
| <30 years            | 284 | 1 [Reference]    | 1 [Reference]    | 123 | 1 [Reference]    | 1 [Reference]    | 112 | 1 [Reference]    | 1 [Reference]    |
| ≥30 years            | 222 | 0.93 (0.76-1.13) | 0.93 (0.76-1.13) | 82  | 0.88 (0.64-1.21) | 0.89 (0.65-1.22) | 106 | 0.92 (0.68-1.25) | 0.92 (0.68-1.25) |
| Time since first use |     |                  |                  |     |                  |                  |     |                  |                  |
| Non-user             | 771 |                  |                  | 324 |                  |                  | 292 |                  |                  |
| <30 years            | 218 | 1 [Reference]    | 1 [Reference]    | 80  | 1 [Reference]    | 1 [Reference]    | 97  | 1 [Reference]    | 1 [Reference]    |
| ≥30 years            | 288 | 0.95 (0.77-1.17) | 0.93 (0.75-1.15) | 125 | 1.10 (0.79-1.54) | 1.09 (0.78-1.53) | 121 | 0.90 (0.66-1.23) | 0.89 (0.65-1.22) |

MV: multivariable; HR: hazard ratio; CI: confidence interval; BMI: body mass index

<sup>a</sup> Including participants whose natural hair color was black, dark brown, red, blond, or light brown, or who had missing information on natural hair color.

<sup>b</sup> Dark natural hair color: black and dark brown.

<sup>c</sup> Light natural hair color: red, blond, and light brown.

<sup>d</sup> Participants were excluded from stratified analyses if they had missing information on natural hair color. The number of cases among “dark hair color” and “light hair color” women does not sum to the total number of cases in “any hair color” women due to the inclusion of women with missing hair color information in the “any hair color” group.

<sup>e</sup> Models were adjusted for age and follow-up cycle.

<sup>f</sup> Models were additionally adjusted for race, natural hair color, cumulative average BMI, BMI at age 18, smoking status, pack-years of smoking, and alcohol intake. In analyses stratified by natural hair color, models were not further adjusted for natural hair color.

<sup>g</sup> Cumulative dose is the product of average frequency of use (times per year) multiplied by duration of use (years).

<sup>h</sup> *P*-value for trend was calculated using the mid-point of each category of cumulative dose in times.

<sup>i</sup> *P*-value for trend was calculated using cumulative dose in times as continuous.



|                      |    |                  |                  |    |                  |                  |   |                  |                  |
|----------------------|----|------------------|------------------|----|------------------|------------------|---|------------------|------------------|
| Non-user             | 28 |                  |                  | 16 |                  |                  | 6 |                  |                  |
| <30 years            | 14 | 1 [Reference]    | 1 [Reference]    | 4  | 1 [Reference]    | 1 [Reference]    | 7 | 1 [Reference]    | 1 [Reference]    |
| ≥30 years            | 9  | 0.64 (0.25-1.62) | 0.62 (0.24-1.58) | 5  | 1.42 (0.32-6.43) | 1.04 (0.20-5.31) | 2 | 0.37 (0.07-1.84) | 0.36 (0.07-1.81) |
| Time since first use |    |                  |                  |    |                  |                  |   |                  |                  |
| Non-user             | 28 |                  |                  | 16 |                  |                  | 6 |                  |                  |
| <30 years            | 11 | 1 [Reference]    | 1 [Reference]    | 5  | 1 [Reference]    | 1 [Reference]    | 3 | 1 [Reference]    | 1 [Reference]    |
| ≥30 years            | 12 | 1.01 (0.42-2.44) | 0.99 (0.40-2.43) | 4  | 0.70 (0.14-3.41) | 0.62 (0.12-3.22) | 6 | 1.79 (0.42-7.56) | 2.01 (0.44-9.10) |

MV: multivariable; HR: hazard ratio; CI: confidence interval; BMI: body mass index

<sup>a</sup> Including participants whose natural hair color was black, dark brown, red, blond, or light brown, or who had missing information on natural hair color.

<sup>b</sup> Dark natural hair color: black and dark brown.

<sup>c</sup> Light natural hair color: red, blond, and light brown.

<sup>d</sup> Participants were excluded from stratified analyses if they had missing information on natural hair color. The number of cases among “dark hair color” and “light hair color” women does not sum to the total number of cases in “any hair color” women due to the inclusion of women with missing hair color information in the “any hair color” group.

<sup>e</sup> Models were adjusted for age and follow-up cycle.

<sup>f</sup> Models were additionally adjusted for race, natural hair color, cumulative average BMI, BMI at age 18, smoking status, pack-years of smoking, and alcohol intake. In analyses stratified by natural hair color, models were not further adjusted for natural hair color.

<sup>g</sup> Cumulative dose is the product of average frequency of use (times per year) multiplied by duration of use (years).

<sup>h</sup> *P*-value for trend was calculated using the mid-point of each category of cumulative dose in times.

<sup>i</sup> *P*-value for trend was calculated using cumulative dose in times as continuous.

**Supplementary Table 23.** Age-adjusted and multivariable (MV)-adjusted hazard ratios (HR) and 95% confidence intervals (CI) of **diffuse large B-cell lymphoma incidence** (n=190) among women in the NHS according to personal use of permanent hair dyes and natural hair color, obtained from Cox models with updated covariate values

| Diffuse large B-cell lymphoma          | Any hair color <sup>a</sup> (n=190) |                                          |                                         | Dark hair color <sup>b,d</sup> (n=76) |                                          |                                         | Light hair color <sup>c,d</sup> (n=79) |                                          |                                         |
|----------------------------------------|-------------------------------------|------------------------------------------|-----------------------------------------|---------------------------------------|------------------------------------------|-----------------------------------------|----------------------------------------|------------------------------------------|-----------------------------------------|
|                                        | No. of cases                        | Age-adjusted <sup>e</sup><br>HR (95% CI) | MV-adjusted <sup>f</sup><br>HR (95% CI) | No. of cases                          | Age-adjusted <sup>e</sup><br>HR (95% CI) | MV-adjusted <sup>f</sup><br>HR (95% CI) | No. of cases                           | Age-adjusted <sup>e</sup><br>HR (95% CI) | MV-adjusted <sup>f</sup><br>HR (95% CI) |
| Ever use                               |                                     |                                          |                                         |                                       |                                          |                                         |                                        |                                          |                                         |
| Non-user                               | 108                                 | 1 [Reference]                            | 1 [Reference]                           | 44                                    | 1 [Reference]                            | 1 [Reference]                           | 46                                     | 1 [Reference]                            | 1 [Reference]                           |
| Ever-user                              | 82                                  | 1.09 (0.82-1.45)                         | 1.06 (0.79-1.42)                        | 32                                    | 1.14 (0.72-1.81)                         | 1.16 (0.72-1.84)                        | 33                                     | 0.87 (0.55-1.36)                         | 0.87 (0.55-1.37)                        |
| Duration of use                        |                                     |                                          |                                         |                                       |                                          |                                         |                                        |                                          |                                         |
| Non-user                               | 108                                 | 1 [Reference]                            | 1 [Reference]                           | 44                                    | 1 [Reference]                            | 1 [Reference]                           | 46                                     | 1 [Reference]                            | 1 [Reference]                           |
| <5 years                               | 30                                  | 1.02 (0.68-1.54)                         | 1.01 (0.67-1.52)                        | 14                                    | 1.29 (0.70-2.38)                         | 1.27 (0.69-2.35)                        | 13                                     | 0.96 (0.52-1.80)                         | 0.95 (0.51-1.79)                        |
| 5-9 years                              | 15                                  | 0.87 (0.50-1.49)                         | 0.84 (0.49-1.45)                        | 5                                     | 0.74 (0.29-1.88)                         | 0.76 (0.30-1.94)                        | 6                                      | 0.72 (0.30-1.68)                         | 0.71 (0.30-1.67)                        |
| ≥10 years                              | 37                                  | 1.29 (0.88-1.88)                         | 1.25 (0.86-1.84)                        | 13                                    | 1.25 (0.66-2.35)                         | 1.29 (0.68-2.45)                        | 14                                     | 0.87 (0.47-1.58)                         | 0.88 (0.48-1.63)                        |
| <i>P</i> -value for trend              |                                     | .26                                      | .33                                     |                                       | .66                                      | .59                                     |                                        | .55                                      | .59                                     |
| Frequency of use                       |                                     |                                          |                                         |                                       |                                          |                                         |                                        |                                          |                                         |
| Non-user                               | 108                                 | 1 [Reference]                            | 1 [Reference]                           | 44                                    | 1 [Reference]                            | 1 [Reference]                           | 46                                     | 1 [Reference]                            | 1 [Reference]                           |
| Every ≥5 weeks                         | 37                                  | 1.14 (0.78-1.66)                         | 1.07 (0.73-1.57)                        | 14                                    | 1.14 (0.62-2.10)                         | 1.15 (0.63-2.13)                        | 17                                     | 0.95 (0.54-1.67)                         | 0.94 (0.53-1.67)                        |
| Every 1-4 weeks                        | 45                                  | 1.05 (0.74-1.49)                         | 1.05 (0.74-1.50)                        | 18                                    | 1.14 (0.66-1.99)                         | 1.16 (0.66-2.03)                        | 16                                     | 0.80 (0.45-1.41)                         | 0.80 (0.45-1.43)                        |
| <i>P</i> -value for trend              |                                     | .75                                      | .76                                     |                                       | .62                                      | .60                                     |                                        | .43                                      | .46                                     |
| Cumulative dose <sup>g</sup>           |                                     |                                          |                                         |                                       |                                          |                                         |                                        |                                          |                                         |
| Non-user                               | 108                                 | 1 [Reference]                            | 1 [Reference]                           | 44                                    | 1 [Reference]                            | 1 [Reference]                           | 46                                     | 1 [Reference]                            | 1 [Reference]                           |
| 1-99 times                             | 35                                  | 0.97 (0.66-1.43)                         | 0.94 (0.64-1.38)                        | 16                                    | 1.20 (0.68-2.15)                         | 1.22 (0.68-2.18)                        | 14                                     | 0.79 (0.43-1.44)                         | 0.77 (0.42-1.41)                        |
| 100-199 times                          | 20                                  | 1.05 (0.65-1.70)                         | 1.01 (0.63-1.64)                        | 7                                     | 0.89 (0.40-2.01)                         | 0.88 (0.39-1.98)                        | 10                                     | 1.01 (0.50-2.00)                         | 1.03 (0.51-2.05)                        |
| ≥200 times                             | 27                                  | 1.33 (0.87-2.03)                         | 1.34 (0.87-2.06)                        | 9                                     | 1.32 (0.63-2.74)                         | 1.37 (0.65-2.87)                        | 9                                      | 0.87 (0.43-1.80)                         | 0.90 (0.44-1.86)                        |
| <i>P</i> -value for trend <sup>h</sup> |                                     | .21                                      | .21                                     |                                       | .59                                      | .55                                     |                                        | .79                                      | .87                                     |
| Per 50-time increment                  |                                     | 1.02 (1.00-1.04)                         | 1.02 (1.00-1.05)                        |                                       | 0.99 (0.90-1.09)                         | 1.00 (0.91-1.10)                        |                                        | 1.02 (0.96-1.09)                         | 1.03 (0.96-1.09)                        |
| <i>P</i> -value for trend <sup>i</sup> |                                     | .10                                      | .06                                     |                                       | .91                                      | .99                                     |                                        | .53                                      | .44                                     |
| Age at first use                       |                                     |                                          |                                         |                                       |                                          |                                         |                                        |                                          |                                         |

|                      |     |                  |                  |    |                  |                  |    |                  |                  |
|----------------------|-----|------------------|------------------|----|------------------|------------------|----|------------------|------------------|
| Non-user             | 108 |                  |                  | 44 |                  |                  | 46 |                  |                  |
| <30 years            | 41  | 1 [Reference]    | 1 [Reference]    | 19 | 1 [Reference]    | 1 [Reference]    | 14 | 1 [Reference]    | 1 [Reference]    |
| ≥30 years            | 41  | 1.35 (0.84-2.18) | 1.34 (0.83-2.16) | 13 | 1.15 (0.51-2.60) | 1.18 (0.50-2.76) | 19 | 1.72 (0.82-3.62) | 1.72 (0.81-3.65) |
| Time since first use |     |                  |                  |    |                  |                  |    |                  |                  |
| Non-user             | 108 |                  |                  | 44 |                  |                  | 46 |                  |                  |
| <30 years            | 41  | 1 [Reference]    | 1 [Reference]    | 16 | 1 [Reference]    | 1 [Reference]    | 15 | 1 [Reference]    | 1 [Reference]    |
| ≥30 years            | 41  | 0.90 (0.54-1.47) | 0.90 (0.54-1.48) | 16 | 1.07 (0.48-2.35) | 1.06 (0.47-2.40) | 18 | 0.82 (0.37-1.79) | 0.85 (0.38-1.89) |

MV: multivariable; HR: hazard ratio; CI: confidence interval; BMI: body mass index

<sup>a</sup> Including participants whose natural hair color was black, dark brown, red, blond, or light brown, or who had missing information on natural hair color.

<sup>b</sup> Dark natural hair color: black and dark brown.

<sup>c</sup> Light natural hair color: red, blond, and light brown.

<sup>d</sup> Participants were excluded from stratified analyses if they had missing information on natural hair color. The number of cases among “dark hair color” and “light hair color” women does not sum to the total number of cases in “any hair color” women due to the inclusion of women with missing hair color information in the “any hair color” group.

<sup>e</sup> Models were adjusted for age and follow-up cycle.

<sup>f</sup> Models were additionally adjusted for race, natural hair color, cumulative average BMI, BMI at age 18, smoking status, pack-years of smoking, and alcohol intake. In analyses stratified by natural hair color, models were not further adjusted for natural hair color.

<sup>g</sup> Cumulative dose is the product of average frequency of use (times per year) multiplied by duration of use (years).

<sup>h</sup> *P*-value for trend was calculated using the mid-point of each category of cumulative dose in times.

<sup>i</sup> *P*-value for trend was calculated using cumulative dose in times as continuous.



|                      |     |                  |                  |    |                  |                  |    |                  |                  |
|----------------------|-----|------------------|------------------|----|------------------|------------------|----|------------------|------------------|
| Non-user             | 111 |                  |                  | 42 |                  |                  | 45 |                  |                  |
| <30 years            | 49  | 1 [Reference]    | 1 [Reference]    | 23 | 1 [Reference]    | 1 [Reference]    | 18 | 1 [Reference]    | 1 [Reference]    |
| ≥30 years            | 44  | 1.06 (0.68-1.65) | 1.08 (0.69-1.69) | 18 | 1.04 (0.51-2.08) | 1.05 (0.51-2.15) | 24 | 1.26 (0.64-2.46) | 1.30 (0.66-2.56) |
| Time since first use |     |                  |                  |    |                  |                  |    |                  |                  |
| Non-user             | 111 |                  |                  | 42 |                  |                  | 45 |                  |                  |
| <30 years            | 36  | 1 [Reference]    | 1 [Reference]    | 15 | 1 [Reference]    | 1 [Reference]    | 19 | 1 [Reference]    | 1 [Reference]    |
| ≥30 years            | 57  | 1.14 (0.70-1.86) | 1.08 (0.66-1.77) | 26 | 1.01 (0.47-2.18) | 1.07 (0.49-2.33) | 23 | 0.98 (0.48-2.02) | 0.97 (0.47-2.00) |

MV: multivariable; HR: hazard ratio; CI: confidence interval; BMI: body mass index

<sup>a</sup> Including participants whose natural hair color was black, dark brown, red, blond, or light brown, or who had missing information on natural hair color.

<sup>b</sup> Dark natural hair color: black and dark brown.

<sup>c</sup> Light natural hair color: red, blond, and light brown.

<sup>d</sup> Participants were excluded from stratified analyses if they had missing information on natural hair color. The number of cases among “dark hair color” and “light hair color” women does not sum to the total number of cases in “any hair color” women due to the inclusion of women with missing hair color information in the “any hair color” group.

<sup>e</sup> Models were adjusted for age and follow-up cycle.

<sup>f</sup> Models were additionally adjusted for race, natural hair color, cumulative average BMI, BMI at age 18, smoking status, pack-years of smoking, and alcohol intake. In analyses stratified by natural hair color, models were not further adjusted for natural hair color.

<sup>g</sup> Cumulative dose is the product of average frequency of use (times per year) multiplied by duration of use (years).

<sup>h</sup> *P*-value for trend was calculated using the mid-point of each category of cumulative dose in times.

<sup>i</sup> *P*-value for trend was calculated using cumulative dose in times as continuous.

**Supplementary Table 25.** Age-adjusted and multivariable (MV)-adjusted hazard ratios (HR) and 95% confidence intervals (CI) of **chronic lymphocytic leukemia/small lymphocytic lymphoma incidence** (n=272) among women in the NHS according to personal use of permanent hair dyes and natural hair color, obtained from Cox models with updated covariate values

| <b>Chronic lymphocytic leukemia/small lymphocytic lymphoma</b> | Any hair color <sup>a</sup> (n=272) |                                          |                                         | Dark hair color <sup>b,d</sup> (n=122) |                                          |                                         | Light hair color <sup>c,d</sup> (n=111) |                                          |                                         |
|----------------------------------------------------------------|-------------------------------------|------------------------------------------|-----------------------------------------|----------------------------------------|------------------------------------------|-----------------------------------------|-----------------------------------------|------------------------------------------|-----------------------------------------|
|                                                                | No. of cases                        | Age-adjusted <sup>e</sup><br>HR (95% CI) | MV-adjusted <sup>f</sup><br>HR (95% CI) | No. of cases                           | Age-adjusted <sup>e</sup><br>HR (95% CI) | MV-adjusted <sup>f</sup><br>HR (95% CI) | No. of cases                            | Age-adjusted <sup>e</sup><br>HR (95% CI) | MV-adjusted <sup>f</sup><br>HR (95% CI) |
| Ever use                                                       |                                     |                                          |                                         |                                        |                                          |                                         |                                         |                                          |                                         |
| Non-user                                                       | 181                                 | 1 [Reference]                            | 1 [Reference]                           | 80                                     | 1 [Reference]                            | 1 [Reference]                           | 73                                      | 1 [Reference]                            | 1 [Reference]                           |
| Ever-user                                                      | 91                                  | 0.72 (0.56-0.93)                         | 0.69 (0.53-0.89)                        | 42                                     | 0.82 (0.56-1.19)                         | 0.78 (0.54-1.14)                        | 38                                      | 0.62 (0.42-0.92)                         | 0.62 (0.41-0.92)                        |
| Duration of use                                                |                                     |                                          |                                         |                                        |                                          |                                         |                                         |                                          |                                         |
| Non-user                                                       | 181                                 | 1 [Reference]                            | 1 [Reference]                           | 80                                     | 1 [Reference]                            | 1 [Reference]                           | 73                                      | 1 [Reference]                            | 1 [Reference]                           |
| <5 years                                                       | 41                                  | 0.83 (0.59-1.17)                         | 0.82 (0.58-1.15)                        | 16                                     | 0.79 (0.46-1.35)                         | 0.77 (0.45-1.32)                        | 17                                      | 0.76 (0.45-1.30)                         | 0.76 (0.45-1.30)                        |
| 5-9 years                                                      | 20                                  | 0.68 (0.43-1.08)                         | 0.65 (0.41-1.03)                        | 11                                     | 0.82 (0.43-1.54)                         | 0.78 (0.41-1.47)                        | 8                                       | 0.58 (0.28-1.21)                         | 0.57 (0.28-1.20)                        |
| ≥10 years                                                      | 30                                  | 0.63 (0.43-0.93)                         | 0.59 (0.40-0.87)                        | 15                                     | 0.85 (0.49-1.49)                         | 0.80 (0.46-1.40)                        | 13                                      | 0.52 (0.29-0.93)                         | 0.51 (0.28-0.93)                        |
| <i>P</i> -value for trend                                      |                                     | .009                                     | .003                                    |                                        | .50                                      | .36                                     |                                         | .02                                      | .02                                     |
| Frequency of use                                               |                                     |                                          |                                         |                                        |                                          |                                         |                                         |                                          |                                         |
| Non-user                                                       | 181                                 | 1 [Reference]                            | 1 [Reference]                           | 80                                     | 1 [Reference]                            | 1 [Reference]                           | 73                                      | 1 [Reference]                            | 1 [Reference]                           |
| Every ≥5 weeks                                                 | 37                                  | 0.68 (0.48-0.97)                         | 0.63 (0.44-0.90)                        | 19                                     | 0.84 (0.50-1.38)                         | 0.79 (0.48-1.31)                        | 14                                      | 0.47 (0.26-0.83)                         | 0.47 (0.26-0.83)                        |
| Every 1-4 weeks                                                | 54                                  | 0.75 (0.55-1.02)                         | 0.74 (0.54-1.00)                        | 23                                     | 0.80 (0.50-1.28)                         | 0.77 (0.48-1.24)                        | 24                                      | 0.76 (0.48-1.21)                         | 0.76 (0.47-1.21)                        |
| <i>P</i> -value for trend                                      |                                     | .048                                     | .04                                     |                                        | .33                                      | .26                                     |                                         | .19                                      | .20                                     |
| Cumulative dose <sup>g</sup>                                   |                                     |                                          |                                         |                                        |                                          |                                         |                                         |                                          |                                         |
| Non-user                                                       | 181                                 | 1 [Reference]                            | 1 [Reference]                           | 80                                     | 1 [Reference]                            | 1 [Reference]                           | 73                                      | 1 [Reference]                            | 1 [Reference]                           |
| 1-99 times                                                     | 43                                  | 0.71 (0.51-1.00)                         | 0.69 (0.49-0.96)                        | 22                                     | 0.89 (0.55-1.43)                         | 0.86 (0.53-1.38)                        | 16                                      | 0.54 (0.31-0.93)                         | 0.54 (0.31-0.93)                        |
| 100-199 times                                                  | 23                                  | 0.71 (0.46-1.10)                         | 0.67 (0.44-1.04)                        | 8                                      | 0.57 (0.27-1.18)                         | 0.54 (0.26-1.12)                        | 12                                      | 0.77 (0.42-1.42)                         | 0.77 (0.41-1.43)                        |
| ≥200 times                                                     | 25                                  | 0.74 (0.48-1.12)                         | 0.71 (0.47-1.08)                        | 12                                     | 0.96 (0.52-1.78)                         | 0.91 (0.49-1.69)                        | 10                                      | 0.62 (0.32-1.21)                         | 0.62 (0.32-1.20)                        |
| <i>P</i> -value for trend <sup>h</sup>                         |                                     | .08                                      | .047                                    |                                        | .50                                      | .38                                     |                                         | .14                                      | .14                                     |

|                                        |     |                  |                  |    |                  |                  |    |                  |                  |
|----------------------------------------|-----|------------------|------------------|----|------------------|------------------|----|------------------|------------------|
| Per 50-time increment                  |     | 0.95 (0.90-1.00) | 0.95 (0.90-1.00) |    | 0.96 (0.88-1.04) | 0.95 (0.87-1.04) |    | 0.95 (0.88-1.04) | 0.95 (0.88-1.04) |
| <i>P</i> -value for trend <sup>i</sup> |     | .07              | .06              |    | .32              | .25              |    | .26              | .28              |
| Age at first use                       |     |                  |                  |    |                  |                  |    |                  |                  |
| Non-user                               | 181 |                  |                  | 80 |                  |                  | 73 |                  |                  |
| <30 years                              | 58  | 1 [Reference]    | 1 [Reference]    | 28 | 1 [Reference]    | 1 [Reference]    | 22 | 1 [Reference]    | 1 [Reference]    |
| ≥30 years                              | 33  | 0.66 (0.41-1.06) | 0.65 (0.40-1.06) | 14 | 0.61 (0.30-1.26) | 0.61 (0.29-1.27) | 16 | 0.73 (0.36-1.51) | 0.74 (0.36-1.54) |
| Time since first use                   |     |                  |                  |    |                  |                  |    |                  |                  |
| Non-user                               | 181 |                  |                  | 80 |                  |                  | 73 |                  |                  |
| <30 years                              | 41  | 1 [Reference]    | 1 [Reference]    | 18 | 1 [Reference]    | 1 [Reference]    | 17 | 1 [Reference]    | 1 [Reference]    |
| ≥30 years                              | 50  | 1.06 (0.66-1.70) | 1.04 (0.65-1.69) | 24 | 1.07 (0.53-2.19) | 1.08 (0.52-2.24) | 21 | 0.93 (0.44-1.99) | 1.00 (0.47-2.16) |

MV: multivariable; HR: hazard ratio; CI: confidence interval; BMI: body mass index

<sup>a</sup> Including participants whose natural hair color was black, dark brown, red, blond, or light brown, or who had missing information on natural hair color.

<sup>b</sup> Dark natural hair color: black and dark brown.

<sup>c</sup> Light natural hair color: red, blond, and light brown.

<sup>d</sup> Participants were excluded from stratified analyses if they had missing information on natural hair color. The number of cases among “dark hair color” and “light hair color” women does not sum to the total number of cases in “any hair color” women due to the inclusion of women with missing hair color information in the “any hair color” group.

<sup>e</sup> Models were adjusted for age and follow-up cycle.

<sup>f</sup> Models were additionally adjusted for race, natural hair color, cumulative average BMI, BMI at age 18, smoking status, pack-years of smoking, and alcohol intake. In analyses stratified by natural hair color, models were not further adjusted for natural hair color.

<sup>g</sup> Cumulative dose is the product of average frequency of use (times per year) multiplied by duration of use (years).

<sup>h</sup> *P*-value for trend was calculated using the mid-point of each category of cumulative dose in times.

<sup>i</sup> *P*-value for trend was calculated using cumulative dose in times as continuous.



|                      |    |                  |                   |    |                  |                  |    |                  |                  |
|----------------------|----|------------------|-------------------|----|------------------|------------------|----|------------------|------------------|
| Non-user             | 37 |                  |                   | 8  |                  |                  | 20 |                  |                  |
| <30 years            | 11 | 1 [Reference]    | 1 [Reference]     | 6  | 1 [Reference]    | 1 [Reference]    | 2  | 1 [Reference]    | 1 [Reference]    |
| ≥30 years            | 22 | 1.23 (0.53-2.88) | 1.19 (0.51, 2.79) | 10 | 1.12 (0.33-3.84) | 0.99 (0.27-3.62) | 9  | 2.95 (0.52-6.83) | 2.88 (0.49-6.81) |
| Time since first use |    |                  |                   |    |                  |                  |    |                  |                  |
| Non-user             | 37 |                  |                   | 8  |                  |                  | 20 |                  |                  |
| <30 years            | 14 | 1 [Reference]    | 1 [Reference]     | 8  | 1 [Reference]    | 1 [Reference]    | 3  | 1 [Reference]    | 1 [Reference]    |
| ≥30 years            | 19 | 0.75 (0.30-1.87) | 0.63 (0.25-1.62)  | 8  | 0.15 (0.03-0.74) | 0.10 (0.02-0.71) | 8  | 2.06 (0.43-9.87) | 1.96 (0.41-9.41) |

MV: multivariable; HR: hazard ratio; CI: confidence interval; BMI: body mass index

<sup>a</sup> Including participants whose natural hair color was black, dark brown, red, blond, or light brown, or who had missing information on natural hair color.

<sup>b</sup> Dark natural hair color: black and dark brown.

<sup>c</sup> Light natural hair color: red, blond, and light brown.

<sup>d</sup> Participants were excluded from stratified analyses if they had missing information on natural hair color. The number of cases among “dark hair color” and “light hair color” women does not sum to the total number of cases in “any hair color” women due to the inclusion of women with missing hair color information in the “any hair color” group.

<sup>e</sup> Models were adjusted for age and follow-up cycle.

<sup>f</sup> Models were additionally adjusted for race, natural hair color, cumulative average BMI, BMI at age 18, smoking status, pack-years of smoking, alcohol intake, and regular use of aspirin. In analyses stratified by natural hair color, models were not further adjusted for natural hair color.

<sup>g</sup> Cumulative dose is the product of average frequency of use (times per year) multiplied by duration of use (years).

<sup>h</sup> *P*-value for trend was calculated using the mid-point of each category of cumulative dose in times.

<sup>i</sup> *P*-value for trend was calculated using cumulative dose in times as continuous.



|                      |     |                  |                  |    |                  |                  |    |                  |                  |
|----------------------|-----|------------------|------------------|----|------------------|------------------|----|------------------|------------------|
| Non-user             | 156 |                  |                  | 67 |                  |                  | 56 |                  |                  |
| <30 years            | 65  | 1 [Reference]    | 1 [Reference]    | 26 | 1 [Reference]    | 1 [Reference]    | 24 | 1 [Reference]    | 1 [Reference]    |
| ≥30 years            | 53  | 0.96 (0.63-1.44) | 0.95 (0.63-1.44) | 20 | 0.98 (0.51-1.91) | 0.98 (0.50-1.91) | 28 | 1.17 (0.63-2.19) | 1.17 (0.62-2.21) |
| Time since first use |     |                  |                  |    |                  |                  |    |                  |                  |
| Non-user             | 156 |                  |                  | 67 |                  |                  | 56 |                  |                  |
| <30 years            | 49  | 1 [Reference]    | 1 [Reference]    | 21 | 1 [Reference]    | 1 [Reference]    | 20 | 1 [Reference]    | 1 [Reference]    |
| ≥30 years            | 69  | 1.28 (0.84-1.94) | 1.27 (0.83-1.93) | 25 | 1.01 (0.51-1.97) | 1.02 (0.52-2.01) | 32 | 1.47 (0.77-2.80) | 1.53 (0.80-2.94) |

MV: multivariable; HR: hazard ratio; CI: confidence interval; BMI: body mass index

<sup>a</sup> Including participants whose natural hair color was black, dark brown, red, blond, or light brown, or who had missing information on natural hair color.

<sup>b</sup> Dark natural hair color: black and dark brown.

<sup>c</sup> Light natural hair color: red, blond, and light brown.

<sup>d</sup> Participants were excluded from stratified analyses if they had missing information on natural hair color. The number of cases among “dark hair color” and “light hair color” women does not sum to the total number of cases in “any hair color” women due to the inclusion of women with missing hair color information in the “any hair color” group.

<sup>e</sup> Models were adjusted for age and follow-up cycle.

<sup>f</sup> Models were additionally adjusted for race, natural hair color, cumulative average BMI, BMI at age 18, smoking status, pack-years of smoking, alcohol intake, and regular use of aspirin. In analyses stratified by natural hair color, models were not further adjusted for natural hair color.

<sup>g</sup> Cumulative dose is the product of average frequency of use (times per year) multiplied by duration of use (years).

<sup>h</sup> *P*-value for trend was calculated using the mid-point of each category of cumulative dose in times.

<sup>i</sup> *P*-value for trend was calculated using cumulative dose in times as continuous.

**Supplementary Table 28.** Age-adjusted and multivariable (MV)-adjusted hazard ratios (HR) and 95% confidence intervals (CI) of **myeloid leukemias incidence** (n=170) among women in the NHS according to personal use of permanent hair dyes and natural hair color, obtained from Cox models with updated covariate values

| Myeloid leukemias                      | Any hair color <sup>a</sup> (n=170) |                                          |                                         | Dark hair color <sup>b,d</sup> (n=59) |                                          |                                         | Light hair color <sup>c,d</sup> (n=64) |                                          |                                         |
|----------------------------------------|-------------------------------------|------------------------------------------|-----------------------------------------|---------------------------------------|------------------------------------------|-----------------------------------------|----------------------------------------|------------------------------------------|-----------------------------------------|
|                                        | No. of cases                        | Age-adjusted <sup>e</sup><br>HR (95% CI) | MV-adjusted <sup>f</sup><br>HR (95% CI) | No. of cases                          | Age-adjusted <sup>e</sup><br>HR (95% CI) | MV-adjusted <sup>f</sup><br>HR (95% CI) | No. of cases                           | Age-adjusted <sup>e</sup><br>HR (95% CI) | MV-adjusted <sup>f</sup><br>HR (95% CI) |
| Ever use                               |                                     |                                          |                                         |                                       |                                          |                                         |                                        |                                          |                                         |
| Non-user                               | 100                                 | 1 [Reference]                            | 1 [Reference]                           | 34                                    | 1 [Reference]                            | 1 [Reference]                           | 37                                     | 1 [Reference]                            | 1 [Reference]                           |
| Ever-user                              | 70                                  | 0.99 (0.73-1.34)                         | 0.99 (0.72-1.34)                        | 25                                    | 1.12 (0.66-1.88)                         | 1.17 (0.69-1.97)                        | 27                                     | 0.90 (0.55-1.48)                         | 0.90 (0.55-1.50)                        |
| Duration of use                        |                                     |                                          |                                         |                                       |                                          |                                         |                                        |                                          |                                         |
| Non-user                               | 100                                 | 1 [Reference]                            | 1 [Reference]                           | 34                                    | 1 [Reference]                            | 1 [Reference]                           | 37                                     | 1 [Reference]                            | 1 [Reference]                           |
| <5 years                               | 26                                  | 0.95 (0.62-1.47)                         | 0.93 (0.60-1.44)                        | 14                                    | 1.60 (0.85-2.99)                         | 1.64 (0.87-3.10)                        | 6                                      | 0.54 (0.23-1.27)                         | 0.54 (0.22-1.28)                        |
| 5-9 years                              | 14                                  | 0.85 (0.49-1.49)                         | 0.85 (0.49-1.50)                        | 4                                     | 0.73 (0.26-2.06)                         | 0.79 (0.28-2.24)                        | 6                                      | 0.93 (0.39-2.21)                         | 0.93 (0.39-2.23)                        |
| ≥10 years                              | 30                                  | 1.11 (0.74-1.67)                         | 1.13 (0.75-1.71)                        | 7                                     | 0.86 (0.38-1.95)                         | 0.88 (0.38-2.03)                        | 15                                     | 1.21 (0.66-2.22)                         | 1.22 (0.67-2.25)                        |
| <i>P</i> -value for trend              |                                     | .72                                      | .66                                     |                                       | .57                                      | .65                                     |                                        | .45                                      | .43                                     |
| Frequency of use                       |                                     |                                          |                                         |                                       |                                          |                                         |                                        |                                          |                                         |
| Non-user                               | 100                                 | 1 [Reference]                            | 1 [Reference]                           | 34                                    | 1 [Reference]                            | 1 [Reference]                           | 37                                     | 1 [Reference]                            | 1 [Reference]                           |
| Every ≥5 weeks                         | 26                                  | 0.85 (0.55-1.31)                         | 0.87 (0.56-1.35)                        | 10                                    | 1.01 (0.50-2.05)                         | 1.02 (0.50-2.08)                        | 12                                     | 0.83 (0.43-1.59)                         | 0.82 (0.43-1.59)                        |
| Every 1-4 weeks                        | 44                                  | 1.09 (0.77-1.56)                         | 1.07 (0.75-1.53)                        | 15                                    | 1.20 (0.65-2.22)                         | 1.30 (0.70-2.41)                        | 15                                     | 0.97 (0.53-1.77)                         | 0.98 (0.53-1.80)                        |
| <i>P</i> -value for trend              |                                     | .64                                      | .73                                     |                                       | .56                                      | .42                                     |                                        | .90                                      | .93                                     |
| Cumulative dose <sup>g</sup>           |                                     |                                          |                                         |                                       |                                          |                                         |                                        |                                          |                                         |
| Non-user                               | 100                                 | 1 [Reference]                            | 1 [Reference]                           | 34                                    | 1 [Reference]                            | 1 [Reference]                           | 37                                     | 1 [Reference]                            | 1 [Reference]                           |
| 1-99 times                             | 36                                  | 1.07 (0.73-1.57)                         | 1.06 (0.72-1.55)                        | 17                                    | 1.61 (0.89-2.89)                         | 1.64 (0.91-2.97)                        | 11                                     | 0.76 (0.38-1.49)                         | 0.75 (0.38-1.48)                        |
| 100-199 times                          | 9                                   | 0.50 (0.25-0.98)                         | 0.50 (0.25-1.00)                        | 1                                     | 0.17 (0.02-1.25)                         | 0.18 (0.02-1.32)                        | 7                                      | 0.83 (0.37-1.88)                         | 0.85 (0.37-1.92)                        |
| ≥200 times                             | 25                                  | 1.32 (0.85-2.05)                         | 1.32 (0.84-2.05)                        | 7                                     | 1.17 (0.51-2.67)                         | 1.24 (0.54-2.86)                        | 9                                      | 1.27 (0.61-2.65)                         | 1.29 (0.61-2.70)                        |
| <i>P</i> -value for trend <sup>h</sup> |                                     | .63                                      | .62                                     |                                       | .74                                      | .88                                     |                                        | .63                                      | .60                                     |
| Per 50-time increment                  |                                     | 1.02 (0.99-1.05)                         | 1.01 (0.99-1.04)                        |                                       | 1.03 (0.95-1.11)                         | 1.03 (0.95-1.11)                        |                                        | 1.03 (0.95-1.12)                         | 1.03 (0.95-1.12)                        |
| <i>P</i> -value for trend <sup>i</sup> |                                     | .30                                      | .34                                     |                                       | .49                                      | .46                                     |                                        | .43                                      | .41                                     |
| Age at first use                       |                                     |                                          |                                         |                                       |                                          |                                         |                                        |                                          |                                         |

|                      |     |                  |                  |    |                  |                  |    |                  |                  |
|----------------------|-----|------------------|------------------|----|------------------|------------------|----|------------------|------------------|
| Non-user             | 100 |                  |                  | 34 |                  |                  | 37 |                  |                  |
| <30 years            | 41  | 1 [Reference]    | 1 [Reference]    | 13 | 1 [Reference]    | 1 [Reference]    | 18 | 1 [Reference]    | 1 [Reference]    |
| ≥30 years            | 29  | 0.81 (0.48-1.39) | 0.82 (0.48-1.41) | 12 | 1.47 (0.61-3.54) | 1.65 (0.64-4.21) | 9  | 0.37 (0.15-0.92) | 0.36 (0.14-0.92) |
| Time since first use |     |                  |                  |    |                  |                  |    |                  |                  |
| Non-user             | 100 |                  |                  | 34 |                  |                  | 37 |                  |                  |
| <30 years            | 30  | 1 [Reference]    | 1 [Reference]    | 10 | 1 [Reference]    | 1 [Reference]    | 11 | 1 [Reference]    | 1 [Reference]    |
| ≥30 years            | 40  | 1.07 (0.61-1.88) | 1.11 (0.63-1.98) | 15 | 1.38 (0.52-3.70) | 1.83 (0.61-5.54) | 16 | 1.19 (0.51-2.78) | 1.28 (0.53-3.08) |

MV: multivariable; HR: hazard ratio; CI: confidence interval; BMI: body mass index

<sup>a</sup> Including participants whose natural hair color was black, dark brown, red, blond, or light brown, or who had missing information on natural hair color.

<sup>b</sup> Dark natural hair color: black and dark brown.

<sup>c</sup> Light natural hair color: red, blond, and light brown.

<sup>d</sup> Participants were excluded from stratified analyses if they had missing information on natural hair color. The number of cases among “dark hair color” and “light hair color” women does not sum to the total number of cases in “any hair color” women due to the inclusion of women with missing hair color information in the “any hair color” group.

<sup>e</sup> Models were adjusted for age and follow-up cycle.

<sup>f</sup> Models were additionally adjusted for race, natural hair color, cumulative average BMI, BMI at age 18, smoking status, pack-years of smoking, and alcohol intake. In analyses stratified by natural hair color, models were not further adjusted for natural hair color.

<sup>g</sup> Cumulative dose is the product of average frequency of use (times per year) multiplied by duration of use (years).

<sup>h</sup> *P*-value for trend was calculated using the mid-point of each category of cumulative dose in times.

<sup>i</sup> *P*-value for trend was calculated using cumulative dose in times as continuous.



|                      |      |                  |                  |     |                  |                  |      |                  |                  |
|----------------------|------|------------------|------------------|-----|------------------|------------------|------|------------------|------------------|
| Non-user             | 2877 |                  |                  | 994 |                  |                  | 1000 |                  |                  |
| <30 years            | 1208 | 1 [Reference]    | 1 [Reference]    | 425 | 1 [Reference]    | 1 [Reference]    | 457  | 1 [Reference]    | 1 [Reference]    |
| ≥30 years            | 775  | 0.93 (0.84-1.03) | 0.92 (0.83-1.02) | 242 | 0.93 (0.78-1.11) | 0.94 (0.79-1.13) | 344  | 0.89 (0.76-1.04) | 0.85 (0.73-1.00) |
| Time since first use |      |                  |                  |     |                  |                  |      |                  |                  |
| Non-user             | 2877 |                  |                  | 994 |                  |                  | 1000 |                  |                  |
| <30 years            | 1043 | 1 [Reference]    | 1 [Reference]    | 339 | 1 [Reference]    | 1 [Reference]    | 464  | 1 [Reference]    | 1 [Reference]    |
| ≥30 years            | 940  | 0.90 (0.81-1.00) | 0.97 (0.87-1.08) | 328 | 0.91 (0.76-1.09) | 0.95 (0.79-1.14) | 337  | 0.81 (0.69-0.95) | 0.84 (0.71-0.99) |

MV: multivariable; HR: hazard ratio; CI: confidence interval; BMI: body mass index; NSAIDs: nonsteroidal anti-inflammatory drugs

<sup>a</sup> Including participants whose natural hair color was black, dark brown, red, blond, or light brown, or who had missing information on natural hair color.

<sup>b</sup> Dark natural hair color: black and dark brown.

<sup>c</sup> Light natural hair color: red, blond, and light brown.

<sup>d</sup> Participants were excluded from stratified analyses if they had missing information on natural hair color. The number of cases among “dark hair color” and “light hair color” women does not sum to the total number of cases in “any hair color” women due to the inclusion of women with missing hair color information in the “any hair color” group.

<sup>e</sup> Models were adjusted for age and follow-up cycle.

<sup>f</sup> Models were additionally adjusted for race, natural hair color, cumulative average BMI, BMI at age 18, smoking status, pack-years of smoking, alcohol intake, physical activity, menopausal status, postmenopausal hormone use, parity, regular use of aspirin, regular use of non-aspirin NSAIDs, multivitamin use, total calories intake, history of hypertension, history of hypercholesterolemia, and history of diabetes mellitus. In analyses stratified by natural hair color, models were not further adjusted for natural hair color.

<sup>g</sup> Cumulative dose is the product of average frequency of use (times per year) multiplied by duration of use (years).

<sup>h</sup> *P*-value for trend was calculated using the mid-point of each category of cumulative dose in times.

<sup>i</sup> *P*-value for trend was calculated using cumulative dose in times as continuous.

**Supplementary Table 30.** Age-adjusted and multivariable (MV)-adjusted hazard ratios (HR) and 95% confidence intervals (CI) of **overall cancer incidence** \* among women in the NHS according to status of personal use of permanent hair dyes and natural hair color, obtained from Cox models with updated covariate values (assuming a latency of 6, 10, 16 and 20 years)

| All cancers *    | Any hair color <sup>a</sup> |                                          |                                         | Dark hair color <sup>b,d</sup> |                                          |                                         | Light hair color <sup>c,d</sup> |                                          |                                         |
|------------------|-----------------------------|------------------------------------------|-----------------------------------------|--------------------------------|------------------------------------------|-----------------------------------------|---------------------------------|------------------------------------------|-----------------------------------------|
|                  | No. of cases                | Age-adjusted <sup>e</sup><br>HR (95% CI) | MV-adjusted <sup>f</sup><br>HR (95% CI) | No. of cases                   | Age-adjusted <sup>e</sup><br>HR (95% CI) | MV-adjusted <sup>f</sup><br>HR (95% CI) | No. of cases                    | Age-adjusted <sup>e</sup><br>HR (95% CI) | MV-adjusted <sup>f</sup><br>HR (95% CI) |
| <b>1976-2012</b> |                             |                                          |                                         |                                |                                          |                                         |                                 |                                          |                                         |
| Non-user         | 13245                       | 1 [Reference]                            | 1 [Reference]                           | 5067                           | 1 [Reference]                            | 1 [Reference]                           | 5134                            | 1 [Reference]                            | 1 [Reference]                           |
| Ever-user        | 9367                        | 1.01 (0.99-1.04)                         | 0.98 (0.96-1.01)                        | 3322                           | 1.02 (0.98-1.07)                         | 1.00 (0.96-1.05)                        | 4283                            | 1.00 (0.96-1.04)                         | 0.98 (0.94-1.02)                        |
| <b>1988-2012</b> |                             |                                          |                                         |                                |                                          |                                         |                                 |                                          |                                         |
| Non-user         | 10290                       | 1 [Reference]                            | 1 [Reference]                           | 4055                           | 1 [Reference]                            | 1 [Reference]                           | 4022                            | 1 [Reference]                            | 1 [Reference]                           |
| Ever-user        | 7357                        | 1.03 (1.00-1.06)                         | 0.99 (0.96-1.02)                        | 2684                           | 1.04 (0.99-1.09)                         | 1.01 (0.96-1.06)                        | 3423                            | 1.02 (0.97-1.07)                         | 0.99 (0.95-1.04)                        |
| <b>1992-2012</b> |                             |                                          |                                         |                                |                                          |                                         |                                 |                                          |                                         |
| Non-user         | 8740                        | 1 [Reference]                            | 1 [Reference]                           | 3461                           | 1 [Reference]                            | 1 [Reference]                           | 3403                            | 1 [Reference]                            | 1 [Reference]                           |
| Ever-user        | 6237                        | 1.03 (1.00-1.07)                         | 0.99 (0.96-1.02)                        | 2279                           | 1.03 (0.98-1.09)                         | 1.01 (0.95-1.06)                        | 2901                            | 1.02 (0.97-1.07)                         | 0.99 (0.94-1.04)                        |
| <b>1998-2012</b> |                             |                                          |                                         |                                |                                          |                                         |                                 |                                          |                                         |
| Non-user         | 5959                        | 1 [Reference]                            | 1 [Reference]                           | 2434                           | 1 [Reference]                            | 1 [Reference]                           | 2262                            | 1 [Reference]                            | 1 [Reference]                           |
| Ever-user        | 4300                        | 1.05 (1.01-1.09)                         | 1.01 (0.97-1.05)                        | 1577                           | 1.03 (0.97-1.10)                         | 1.00 (0.94-1.07)                        | 1988                            | 1.05 (0.99-1.12)                         | 1.02 (0.96-1.09)                        |
| <b>2002-2012</b> |                             |                                          |                                         |                                |                                          |                                         |                                 |                                          |                                         |
| Non-user         | 3820                        | 1 [Reference]                            | 1 [Reference]                           | 1576                           | 1 [Reference]                            | 1 [Reference]                           | 1454                            | 1 [Reference]                            | 1 [Reference]                           |
| Ever-user        | 2768                        | 1.06 (1.01-1.12)                         | 1.02 (0.97-1.07)                        | 1045                           | 1.06 (0.98-1.15)                         | 1.03 (0.95-1.11)                        | 1273                            | 1.05 (0.97-1.13)                         | 1.02 (0.95-1.11)                        |

MV: multivariable; HR: hazard ratio; CI: confidence interval; BMI: body mass index

\* Not including basal cell carcinoma and cutaneous squamous cell carcinoma.

<sup>a</sup> Including participants whose natural hair color was black, dark brown, red, blond, or light brown, or who had missing information on natural hair color.

<sup>b</sup> Dark natural hair color: black and dark brown.

<sup>c</sup> Light natural hair color: red, blond, and light brown.

<sup>d</sup> Participants were excluded from stratified analyses if they had missing information on natural hair color. The number of cases among “dark hair color” and “light hair color” women does not sum to the total number of cases in “any hair color” women due to the inclusion of women with missing hair color information in the “any hair color” group.

<sup>e</sup> Models were adjusted for age and follow-up cycle.

<sup>f</sup> Models were additionally adjusted for race, natural hair color, cumulative average BMI, BMI at age 18, smoking status, pack-years of smoking, and alcohol intake. In analyses stratified by natural hair color, models were not further adjusted for natural hair color.

**Supplementary Table 31.** Age-adjusted and multivariable (MV)-adjusted hazard ratios (HR) and 95% confidence intervals (CI) of **overall cancer incidence** \* among women in the NHS according to cumulative dose of permanent hair dye use <sup>a</sup> and natural hair color, obtained from Cox models with updated covariate values (assuming a latency of 6, 10, 16 and 20 years)

| All cancers *                          | Any hair color <sup>b</sup> |                           |                          | Dark hair color <sup>c,e</sup> |                           |                          | Light hair color <sup>d,e</sup> |                           |                          |
|----------------------------------------|-----------------------------|---------------------------|--------------------------|--------------------------------|---------------------------|--------------------------|---------------------------------|---------------------------|--------------------------|
|                                        | No. of cases                | Age-adjusted <sup>f</sup> | MV-adjusted <sup>g</sup> | No. of cases                   | Age-adjusted <sup>f</sup> | MV-adjusted <sup>g</sup> | No. of cases                    | Age-adjusted <sup>f</sup> | MV-adjusted <sup>g</sup> |
|                                        |                             | HR (95% CI)               | HR (95% CI)              |                                | HR (95% CI)               | HR (95% CI)              |                                 | HR (95% CI)               | HR (95% CI)              |
| <b>1976-2012</b>                       |                             |                           |                          |                                |                           |                          |                                 |                           |                          |
| Non-user                               | 13245                       | 1 [Reference]             | 1 [Reference]            | 5067                           | 1 [Reference]             | 1 [Reference]            | 5134                            | 1 [Reference]             | 1 [Reference]            |
| 1-99 times                             | 4492                        | 1.01 (0.98-1.05)          | 0.98 (0.94-1.01)         | 1678                           | 1.05 (0.99-1.11)          | 1.02 (0.96-1.08)         | 1988                            | 0.97 (0.92-1.02)          | 0.95 (0.90-1.00)         |
| 100-199 times                          | 2393                        | 1.01 (0.97-1.06)          | 0.98 (0.94-1.03)         | 904                            | 1.01 (0.94-1.09)          | 0.99 (0.92-1.06)         | 1109                            | 0.99 (0.93-1.06)          | 0.98 (0.92-1.05)         |
| ≥200 times                             | 2482                        | 1.02 (0.98-1.07)          | 1.00 (0.96-1.05)         | 740                            | 0.98 (0.91-1.06)          | 0.97 (0.90-1.05)         | 1186                            | 1.05 (0.99-1.12)          | 1.03 (0.97-1.10)         |
| <i>P</i> -value for trend <sup>h</sup> |                             | .34                       | .94                      |                                | .81                       | .47                      |                                 | .14                       | .36                      |
| Per 50-time increment                  |                             | 1.00 (1.00-1.00)          | 1.00 (0.99-1.00)         |                                | 1.00 (0.99-1.01)          | 1.00 (0.99-1.01)         |                                 | 1.00 (1.00-1.01)          | 1.00 (1.00-1.01)         |
| <i>P</i> -value for trend <sup>i</sup> |                             | .84                       | .74                      |                                | .66                       | .44                      |                                 | .31                       | .59                      |
| <b>1988-2012</b>                       |                             |                           |                          |                                |                           |                          |                                 |                           |                          |
| Non-user                               | 10290                       | 1 [Reference]             | 1 [Reference]            | 4055                           | 1 [Reference]             | 1 [Reference]            | 4022                            | 1 [Reference]             | 1 [Reference]            |
| 1-99 times                             | 3586                        | 1.03 (1.00-1.07)          | 0.99 (0.95-1.02)         | 1376                           | 1.06 (1.00-1.13)          | 1.03 (0.97-1.10)         | 1592                            | 0.99 (0.93-1.05)          | 0.96 (0.90-1.01)         |
| 100-199 times                          | 1886                        | 1.03 (0.98-1.09)          | 0.99 (0.94-1.04)         | 712                            | 1.00 (0.93-1.09)          | 0.98 (0.91-1.07)         | 910                             | 1.04 (0.97-1.12)          | 1.02 (0.95-1.10)         |
| ≥200 times                             | 1885                        | 1.02 (0.97-1.07)          | 1.00 (0.95-1.05)         | 596                            | 1.02 (0.93-1.11)          | 1.00 (0.92-1.10)         | 921                             | 1.05 (0.98-1.13)          | 1.03 (0.96-1.11)         |
| <i>P</i> -value for trend <sup>h</sup> |                             | .27                       | .94                      |                                | .68                       | .92                      |                                 | .09                       | .28                      |
| Per 50-time increment                  |                             | 1.00 (0.99-1.00)          | 1.00 (0.99-1.00)         |                                | 1.00 (0.99-1.01)          | 1.00 (0.99-1.01)         |                                 | 1.00 (1.00-1.01)          | 1.00 (0.99-1.01)         |
| <i>P</i> -value for trend <sup>i</sup> |                             | .90                       | .52                      |                                | .90                       | .84                      |                                 | .51                       | .90                      |
| <b>1992-2012</b>                       |                             |                           |                          |                                |                           |                          |                                 |                           |                          |
| Non-user                               | 8740                        | 1 [Reference]             | 1 [Reference]            | 3461                           | 1 [Reference]             | 1 [Reference]            | 3403                            | 1 [Reference]             | 1 [Reference]            |
| 1-99 times                             | 3086                        | 1.05 (1.00-1.09)          | 0.99 (0.95-1.03)         | 1193                           | 1.07 (1.00-1.14)          | 1.04 (0.97-1.11)         | 1367                            | 1.00 (0.94-1.06)          | 0.96 (0.90-1.03)         |
| 100-199 times                          | 1592                        | 1.03 (0.98-1.09)          | 0.99 (0.94-1.04)         | 600                            | 1.00 (0.92-1.10)          | 0.98 (0.90-1.07)         | 771                             | 1.05 (0.97-1.13)          | 1.03 (0.95-1.11)         |
| ≥200 times                             | 1559                        | 1.01 (0.95-1.06)          | 0.98 (0.93-1.04)         | 486                            | 0.99 (0.90-1.09)          | 0.97 (0.88-1.07)         | 763                             | 1.04 (0.96-1.13)          | 1.01 (0.94-1.10)         |

|                                        |      |                  |                  |      |                  |                  |      |                  |                  |
|----------------------------------------|------|------------------|------------------|------|------------------|------------------|------|------------------|------------------|
| <i>P</i> -value for trend <sup>h</sup> |      | .61              | .51              |      | .87              | .49              |      | .21              | .53              |
| Per 50-time increment                  |      | 1.00 (0.99-1.00) | 1.00 (0.99-1.00) |      | 1.00 (0.99-1.01) | 1.00 (0.99-1.01) |      | 1.00 (0.99-1.01) | 1.00 (0.99-1.01) |
| <i>P</i> -value for trend <sup>i</sup> |      | .62              | .31              |      | .65              | .42              |      | .82              | .79              |
| <b>1998-2012</b>                       |      |                  |                  |      |                  |                  |      |                  |                  |
| Non-user                               | 5959 | 1 [Reference]    | 1 [Reference]    | 2434 | 1 [Reference]    | 1 [Reference]    | 2262 | 1 [Reference]    | 1 [Reference]    |
| 1-99 times                             | 2171 | 1.07 (1.02-1.13) | 1.02 (0.97-1.07) | 843  | 1.08 (0.99-1.16) | 1.04 (0.96-1.12) | 952  | 1.04 (0.96-1.12) | 1.00 (0.92-1.08) |
| 100-199 times                          | 1065 | 1.03 (0.96-1.10) | 0.98 (0.92-1.05) | 391  | 0.95 (0.85-1.05) | 0.92 (0.82-1.02) | 527  | 1.08 (0.98-1.19) | 1.06 (0.96-1.16) |
| ≥200 times                             | 1064 | 1.03 (0.97-1.10) | 1.01 (0.94-1.08) | 343  | 1.03 (0.92-1.16) | 1.01 (0.90-1.13) | 509  | 1.05 (0.96-1.16) | 1.03 (0.93-1.13) |
| <i>P</i> -value for trend <sup>h</sup> |      | .29              | .99              |      | .96              | .65              |      | .16              | .38              |
| Per 50-time increment                  |      | 1.00 (0.99-1.00) | 1.00 (0.99-1.00) |      | 1.00 (0.99-1.01) | 1.00 (0.98-1.01) |      | 1.00 (0.99-1.01) | 1.00 (0.99-1.01) |
| <i>P</i> -value for trend <sup>i</sup> |      | .41              | .21              |      | .69              | .46              |      | .98              | .70              |
| <b>2002-2012</b>                       |      |                  |                  |      |                  |                  |      |                  |                  |
| Non-user                               | 3820 | 1 [Reference]    | 1 [Reference]    | 1576 | 1 [Reference]    | 1 [Reference]    | 1454 | 1 [Reference]    | 1 [Reference]    |
| 1-99 times                             | 1405 | 1.08 (1.02-1.15) | 1.02 (0.96-1.09) | 566  | 1.10 (1.00-1.22) | 1.07 (0.97-1.17) | 613  | 1.03 (0.94-1.14) | 1.00 (0.91-1.10) |
| 100-199 times                          | 681  | 1.04 (0.96-1.13) | 0.99 (0.91-1.08) | 258  | 0.97 (0.85-1.11) | 0.94 (0.82-1.08) | 335  | 1.08 (0.96-1.22) | 1.07 (0.94-1.20) |
| ≥200 times                             | 682  | 1.05 (0.97-1.14) | 1.04 (0.95-1.13) | 221  | 1.06 (0.91-1.22) | 1.04 (0.90-1.20) | 325  | 1.06 (0.94-1.20) | 1.04 (0.92-1.17) |
| <i>P</i> -value for trend <sup>h</sup> |      | .18              | .51              |      | .63              | .92              |      | .23              | .39              |
| Per 50-time increment                  |      | 1.00 (0.99-1.00) | 1.00 (0.99-1.01) |      | 1.00 (0.99-1.01) | 1.00 (0.99-1.01) |      | 1.00 (0.99-1.01) | 1.01 (1.00-1.02) |
| <i>P</i> -value for trend <sup>i</sup> |      | .61              | .76              |      | .84              | .87              |      | .44              | .15              |

MV: multivariable; HR: hazard ratio; CI: confidence interval; BMI: body mass index

\* Not including basal cell carcinoma and cutaneous squamous cell carcinoma.

<sup>a</sup> Cumulative dose is the product of average frequency of use (times per year) multiplied by duration of use (years).

<sup>b</sup> Including participants whose natural hair color was black, dark brown, red, blond, or light brown, or who had missing information on natural hair color.

<sup>c</sup> Dark natural hair color: black and dark brown.

<sup>d</sup> Light natural hair color: red, blond, and light brown.

<sup>e</sup> Participants were excluded from stratified analyses if they had missing information on natural hair color. The number of cases among “dark hair color” and “light hair color” women does not sum to the total number of cases in “any hair color” women due to the inclusion of women with missing hair color information in the “any hair color” group.

<sup>f</sup> Models were adjusted for age and follow-up cycle.

<sup>g</sup> Models were additionally adjusted for race, natural hair color, cumulative average BMI, BMI at age 18, smoking status, pack-years of smoking, and alcohol intake. In analyses stratified by natural hair color, models were not further adjusted for natural hair color.

<sup>h</sup> *P*-value for trend was calculated using the mid-point of each category of cumulative dose in times.

<sup>i</sup> *P*-value for trend was calculated using cumulative dose in times as continuous.

**Supplementary Table 32.** Age-adjusted and multivariable (MV)-adjusted hazard ratios (HR) and 95% confidence intervals (CI) of **basal cell carcinoma incidence** among women in the NHS according to status of personal use of permanent hair dyes and natural hair color, obtained from Cox models with updated covariate values (assuming a latency of 6, 10, 16 and 20 years)

| Basal cell carcinoma | Any hair color <sup>a</sup> |                                          |                                         | Dark hair color <sup>b,d</sup> |                                          |                                         | Light hair color <sup>c,d</sup> |                                          |                                         |
|----------------------|-----------------------------|------------------------------------------|-----------------------------------------|--------------------------------|------------------------------------------|-----------------------------------------|---------------------------------|------------------------------------------|-----------------------------------------|
|                      | No. of cases                | Age-adjusted <sup>e</sup><br>HR (95% CI) | MV-adjusted <sup>f</sup><br>HR (95% CI) | No. of cases                   | Age-adjusted <sup>e</sup><br>HR (95% CI) | MV-adjusted <sup>f</sup><br>HR (95% CI) | No. of cases                    | Age-adjusted <sup>e</sup><br>HR (95% CI) | MV-adjusted <sup>f</sup><br>HR (95% CI) |
| <b>1976-2012</b>     |                             |                                          |                                         |                                |                                          |                                         |                                 |                                          |                                         |
| Non-user             | 12536                       | 1 [Reference]                            | 1 [Reference]                           | 4538                           | 1 [Reference]                            | 1 [Reference]                           | 5891                            | 1 [Reference]                            | 1 [Reference]                           |
| Ever-user            | 10024                       | 1.15 (1.12-1.18)                         | 1.05 (1.02-1.08)                        | 3199                           | 1.10 (1.05-1.15)                         | 1.01 (0.96-1.06)                        | 5443                            | 1.11 (1.07-1.15)                         | 1.06 (1.02-1.11)                        |
| <b>1988-2012</b>     |                             |                                          |                                         |                                |                                          |                                         |                                 |                                          |                                         |
| Non-user             | 9655                        | 1 [Reference]                            | 1 [Reference]                           | 3555                           | 1 [Reference]                            | 1 [Reference]                           | 4468                            | 1 [Reference]                            | 1 [Reference]                           |
| Ever-user            | 7723                        | 1.15 (1.12-1.19)                         | 1.06 (1.03-1.10)                        | 2506                           | 1.11 (1.05-1.17)                         | 1.03 (0.98-1.09)                        | 4140                            | 1.11 (1.07-1.16)                         | 1.07 (1.03-1.12)                        |
| <b>1992-2012</b>     |                             |                                          |                                         |                                |                                          |                                         |                                 |                                          |                                         |
| Non-user             | 8148                        | 1 [Reference]                            | 1 [Reference]                           | 3035                           | 1 [Reference]                            | 1 [Reference]                           | 3747                            | 1 [Reference]                            | 1 [Reference]                           |
| Ever-user            | 6476                        | 1.15 (1.11-1.19)                         | 1.06 (1.02-1.10)                        | 2106                           | 1.09 (1.04-1.16)                         | 1.02 (0.96-1.08)                        | 3486                            | 1.12 (1.07-1.17)                         | 1.08 (1.03-1.14)                        |
| <b>1998-2012</b>     |                             |                                          |                                         |                                |                                          |                                         |                                 |                                          |                                         |
| Non-user             | 5838                        | 1 [Reference]                            | 1 [Reference]                           | 2237                           | 1 [Reference]                            | 1 [Reference]                           | 2665                            | 1 [Reference]                            | 1 [Reference]                           |
| Ever-user            | 4561                        | 1.14 (1.10-1.18)                         | 1.05 (1.00-1.09)                        | 1500                           | 1.07 (1.00-1.14)                         | 1.00 (0.93-1.07)                        | 2468                            | 1.12 (1.06-1.18)                         | 1.08 (1.02-1.15)                        |
| <b>2002-2012</b>     |                             |                                          |                                         |                                |                                          |                                         |                                 |                                          |                                         |
| Non-user             | 4115                        | 1 [Reference]                            | 1 [Reference]                           | 1632                           | 1 [Reference]                            | 1 [Reference]                           | 1868                            | 1 [Reference]                            | 1 [Reference]                           |
| Ever-user            | 3102                        | 1.11 (1.06-1.16)                         | 1.02 (0.97-1.07)                        | 1056                           | 1.04 (0.96-1.12)                         | 0.98 (0.90-1.06)                        | 1676                            | 1.09 (1.02-1.16)                         | 1.05 (0.98-1.12)                        |

MV: multivariable; HR: hazard ratio; CI: confidence interval; BMI: body mass index

<sup>a</sup> Including participants whose natural hair color was black, dark brown, red, blond, or light brown, or who had missing information on natural hair color.

<sup>b</sup> Dark natural hair color: black and dark brown.

<sup>c</sup> Light natural hair color: red, blond, and light brown.

<sup>d</sup> Participants were excluded from stratified analyses if they had missing information on natural hair color. The number of cases among “dark hair color” and “light hair color” women does not sum to the total number of cases in “any hair color” women due to the inclusion of women with missing hair color information in the “any hair color” group.

<sup>e</sup> Models were adjusted for age and follow-up cycle.

<sup>f</sup> Models were additionally adjusted for race, natural hair color, cumulative average BMI, BMI at age 18, smoking status, pack-years of smoking, alcohol intake, childhood reaction to sun, lifetime blistering sunburns, number of moles on arms, and cumulative UV flux since baseline. In analyses stratified by natural hair color, models were not further adjusted for natural hair color.

**Supplementary Table 33.** Age-adjusted and multivariable (MV)-adjusted hazard ratios (HR) and 95% confidence intervals (CI) of **basal cell carcinoma incidence** among women in the NHS according to cumulative dose of permanent hair dye use <sup>a</sup> and natural hair color, obtained from Cox models with updated covariate values (assuming a latency of 6, 10, 16 and 20 years)

| Basal cell carcinoma                   | Any hair color <sup>b</sup> |                           |                          | Dark hair color <sup>c,e</sup> |                           |                          | Light hair color <sup>d,e</sup> |                           |                          |
|----------------------------------------|-----------------------------|---------------------------|--------------------------|--------------------------------|---------------------------|--------------------------|---------------------------------|---------------------------|--------------------------|
|                                        | No. of cases                | Age-adjusted <sup>f</sup> | MV-adjusted <sup>g</sup> | No. of cases                   | Age-adjusted <sup>f</sup> | MV-adjusted <sup>g</sup> | No. of cases                    | Age-adjusted <sup>f</sup> | MV-adjusted <sup>g</sup> |
|                                        |                             | HR (95% CI)               | HR (95% CI)              |                                | HR (95% CI)               | HR (95% CI)              |                                 | HR (95% CI)               | HR (95% CI)              |
| <b>1976-2012</b>                       |                             |                           |                          |                                |                           |                          |                                 |                           |                          |
| Non-user                               | 12536                       | 1 [Reference]             | 1 [Reference]            | 4538                           | 1 [Reference]             | 1 [Reference]            | 5891                            | 1 [Reference]             | 1 [Reference]            |
| 1-99 times                             | 4808                        | 1.14 (1.10-1.18)          | 1.05 (1.02-1.09)         | 1526                           | 1.05 (0.99-1.11)          | 0.98 (0.93-1.05)         | 2645                            | 1.13 (1.08-1.18)          | 1.09 (1.04-1.15)         |
| 100-199 times                          | 2605                        | 1.16 (1.11-1.21)          | 1.04 (1.00-1.09)         | 895                            | 1.12 (1.04-1.20)          | 1.03 (0.96-1.11)         | 1387                            | 1.09 (1.03-1.16)          | 1.03 (0.97-1.10)         |
| ≥200 times                             | 2611                        | 1.15 (1.10-1.20)          | 1.05 (1.00-1.09)         | 778                            | 1.17 (1.09-1.27)          | 1.04 (0.96-1.13)         | 1411                            | 1.11 (1.04-1.17)          | 1.04 (0.98-1.11)         |
| <i>P</i> -value for trend <sup>h</sup> |                             | <0.001                    | .03                      |                                | <0.001                    | .25                      |                                 | <0.001                    | .23                      |
| Per 50-time increment                  |                             | 1.01 (1.01-1.01)          | 1.00 (1.00-1.01)         |                                | 1.01 (1.01-1.02)          | 1.00 (1.00-1.01)         |                                 | 1.01 (1.00-1.01)          | 1.00 (0.99-1.01)         |
| <i>P</i> -value for trend <sup>i</sup> |                             | <0.001                    | .40                      |                                | <0.001                    | .29                      |                                 | .07                       | .96                      |
| <b>1988-2012</b>                       |                             |                           |                          |                                |                           |                          |                                 |                           |                          |
| Non-user                               | 9655                        | 1 [Reference]             | 1 [Reference]            | 3555                           | 1 [Reference]             | 1 [Reference]            | 4468                            | 1 [Reference]             | 1 [Reference]            |
| 1-99 times                             | 3762                        | 1.15 (1.11-1.19)          | 1.07 (1.03-1.11)         | 1212                           | 1.06 (0.99-1.13)          | 1.01 (0.94-1.08)         | 2044                            | 1.13 (1.08-1.20)          | 1.10 (1.04-1.17)         |
| 100-199 times                          | 2001                        | 1.17 (1.11-1.23)          | 1.06 (1.01-1.11)         | 694                            | 1.13 (1.04-1.22)          | 1.04 (0.96-1.13)         | 1052                            | 1.09 (1.02-1.17)          | 1.04 (0.97-1.12)         |
| ≥200 times                             | 1960                        | 1.15 (1.09-1.21)          | 1.05 (1.00-1.11)         | 600                            | 1.20 (1.10-1.31)          | 1.07 (0.98-1.17)         | 1044                            | 1.10 (1.02-1.17)          | 1.05 (0.98-1.13)         |
| <i>P</i> -value for trend <sup>h</sup> |                             | <0.001                    | .02                      |                                | <0.001                    | .10                      |                                 | .004                      | .20                      |
| Per 50-time increment                  |                             | 1.01 (1.00-1.01)          | 1.00 (1.00-1.01)         |                                | 1.01 (1.00-1.02)          | 1.00 (0.99-1.01)         |                                 | 1.00 (1.00-1.01)          | 1.00 (0.99-1.01)         |
| <i>P</i> -value for trend <sup>i</sup> |                             | <0.001                    | .50                      |                                | .002                      | .45                      |                                 | .22                       | .86                      |
| <b>1992-2012</b>                       |                             |                           |                          |                                |                           |                          |                                 |                           |                          |
| Non-user                               | 8148                        | 1 [Reference]             | 1 [Reference]            | 3035                           | 1 [Reference]             | 1 [Reference]            | 3747                            | 1 [Reference]             | 1 [Reference]            |
| 1-99 times                             | 3199                        | 1.15 (1.11-1.20)          | 1.07 (1.02-1.12)         | 1031                           | 1.05 (0.98-1.13)          | 1.00 (0.93-1.07)         | 1746                            | 1.15 (1.09-1.22)          | 1.12 (1.06-1.19)         |
| 100-199 times                          | 1677                        | 1.17 (1.11-1.24)          | 1.06 (1.00-1.12)         | 586                            | 1.12 (1.03-1.23)          | 1.03 (0.94-1.13)         | 884                             | 1.10 (1.02-1.18)          | 1.05 (0.98-1.14)         |
| ≥200 times                             | 1600                        | 1.12 (1.07-1.19)          | 1.04 (0.98-1.10)         | 489                            | 1.17 (1.06-1.29)          | 1.05 (0.95-1.16)         | 856                             | 1.08 (1.00-1.16)          | 1.04 (0.97-1.13)         |

|                                        |      |                  |                  |      |                  |                  |      |                  |                  |
|----------------------------------------|------|------------------|------------------|------|------------------|------------------|------|------------------|------------------|
| <i>P</i> -value for trend <sup>h</sup> |      | <0.001           | .09              |      | <0.001           | .29              |      | .03              | .29              |
| Per 50-time increment                  |      | 1.01 (1.00-1.01) | 1.00 (0.99-1.01) |      | 1.01 (1.00-1.02) | 1.00 (0.99-1.01) |      | 1.00 (0.99-1.01) | 1.00 (0.99-1.01) |
| <i>P</i> -value for trend <sup>i</sup> |      | .009             | .90              |      | .04              | .99              |      | .71              | .67              |
| <b>1998-2012</b>                       |      |                  |                  |      |                  |                  |      |                  |                  |
| Non-user                               | 5838 | 1 [Reference]    | 1 [Reference]    | 2237 | 1 [Reference]    | 1 [Reference]    | 2665 | 1 [Reference]    | 1 [Reference]    |
| 1-99 times                             | 2274 | 1.13 (1.08-1.19) | 1.05 (1.00-1.11) | 762  | 1.04 (0.96-1.13) | 0.99 (0.91-1.08) | 1228 | 1.12 (1.05-1.20) | 1.10 (1.02-1.18) |
| 100-199 times                          | 1184 | 1.17 (1.10-1.25) | 1.05 (0.98-1.12) | 417  | 1.10 (0.99-1.23) | 1.01 (0.91-1.13) | 635  | 1.12 (1.03-1.23) | 1.07 (0.98-1.17) |
| ≥200 times                             | 1103 | 1.12 (1.05-1.19) | 1.04 (0.97-1.11) | 321  | 1.10 (0.98-1.24) | 1.00 (0.88-1.13) | 605  | 1.09 (1.00-1.20) | 1.07 (0.97-1.17) |
| <i>P</i> -value for trend <sup>h</sup> |      | <0.001           | .20              |      | .04              | .97              |      | .02              | .14              |
| Per 50-time increment                  |      | 1.01 (1.00-1.01) | 1.00 (0.99-1.01) |      | 1.00 (0.99-1.01) | 0.99 (0.98-1.01) |      | 1.00 (1.00-1.01) | 1.00 (0.99-1.01) |
| <i>P</i> -value for trend <sup>i</sup> |      | .07              | .74              |      | .75              | .21              |      | .39              | .72              |
| <b>2002-2012</b>                       |      |                  |                  |      |                  |                  |      |                  |                  |
| Non-user                               | 4115 | 1 [Reference]    | 1 [Reference]    | 1632 | 1 [Reference]    | 1 [Reference]    | 1868 | 1 [Reference]    | 1 [Reference]    |
| 1-99 times                             | 1558 | 1.10 (1.04-1.17) | 1.02 (0.95-1.08) | 554  | 1.03 (0.93-1.13) | 0.98 (0.88-1.08) | 830  | 1.08 (0.99-1.17) | 1.04 (0.96-1.14) |
| 100-199 times                          | 796  | 1.13 (1.04-1.22) | 1.01 (0.93-1.09) | 284  | 1.04 (0.92-1.19) | 0.98 (0.86-1.12) | 429  | 1.09 (0.98-1.21) | 1.04 (0.93-1.16) |
| ≥200 times                             | 748  | 1.10 (1.02-1.19) | 1.03 (0.95-1.12) | 218  | 1.06 (0.91-1.22) | 0.97 (0.84-1.13) | 417  | 1.10 (0.99-1.22) | 1.06 (0.95-1.19) |
| <i>P</i> -value for trend <sup>h</sup> |      | .002             | .46              |      | .37              | .65              |      | .048             | .26              |
| Per 50-time increment                  |      | 1.01 (1.00-1.01) | 1.00 (0.99-1.01) |      | 1.00 (0.99-1.01) | 0.99 (0.98-1.01) |      | 1.00 (1.00-1.01) | 1.00 (0.99-1.01) |
| <i>P</i> -value for trend <sup>i</sup> |      | .04              | .75              |      | .66              | .24              |      | .37              | .84              |

MV: multivariable; HR: hazard ratio; CI: confidence interval; BMI: body mass index

<sup>a</sup> Cumulative dose is the product of average frequency of use (times per year) multiplied by duration of use (years).

<sup>b</sup> Including participants whose natural hair color was black, dark brown, red, blond, or light brown, or who had missing information on natural hair color.

<sup>c</sup> Dark natural hair color: black and dark brown.

<sup>d</sup> Light natural hair color: red, blond, and light brown.

<sup>e</sup> Participants were excluded from stratified analyses if they had missing information on natural hair color. The number of cases among “dark hair color” and “light hair color” women does not sum to the total number of cases in “any hair color” women due to the inclusion of women with missing hair color information in the “any hair color” group.

<sup>f</sup> Models were adjusted for age and follow-up cycle.

<sup>g</sup> Models were additionally adjusted for race, natural hair color, cumulative average BMI, BMI at age 18, smoking status, pack-years of smoking, alcohol intake, childhood reaction to sun, lifetime blistering sunburns, number of moles on arms, and cumulative UV flux since baseline. In analyses stratified by natural hair color, models were not further adjusted for natural hair color.

<sup>h</sup> *P*-value for trend was calculated using the mid-point of each category of cumulative dose in times.

<sup>i</sup> *P*-value for trend was calculated using cumulative dose in times as continuous.

**Supplementary Table 34.** Age-adjusted and multivariable (MV)-adjusted hazard ratios (HR) and 95% confidence intervals (CI) of **breast cancer incidence** among women in the NHS according to status of personal use of permanent hair dyes and natural hair color, obtained from Cox models with updated covariate values (assuming a latency of 6, 10, 16 and 20 years)

| Breast cancer    | Any hair color <sup>a</sup> |                                          |                                         | Dark hair color <sup>b,d</sup> |                                          |                                         | Light hair color <sup>c,d</sup> |                                          |                                         |
|------------------|-----------------------------|------------------------------------------|-----------------------------------------|--------------------------------|------------------------------------------|-----------------------------------------|---------------------------------|------------------------------------------|-----------------------------------------|
|                  | No. of cases                | Age-adjusted <sup>e</sup><br>HR (95% CI) | MV-adjusted <sup>f</sup><br>HR (95% CI) | No. of cases                   | Age-adjusted <sup>e</sup><br>HR (95% CI) | MV-adjusted <sup>f</sup><br>HR (95% CI) | No. of cases                    | Age-adjusted <sup>e</sup><br>HR (95% CI) | MV-adjusted <sup>f</sup><br>HR (95% CI) |
| <b>1976-2012</b> |                             |                                          |                                         |                                |                                          |                                         |                                 |                                          |                                         |
| Non-user         | 5332                        | 1 [Reference]                            | 1 [Reference]                           | 2117                           | 1 [Reference]                            | 1 [Reference]                           | 2084                            | 1 [Reference]                            | 1 [Reference]                           |
| Ever-user        | 3920                        | 1.06 (1.01-1.10)                         | 1.02 (0.98-1.06)                        | 1448                           | 1.08 (1.01-1.15)                         | 1.05 (0.98-1.12)                        | 1818                            | 1.04 (0.98-1.11)                         | 1.02 (0.95-1.09)                        |
| <b>1988-2012</b> |                             |                                          |                                         |                                |                                          |                                         |                                 |                                          |                                         |
| Non-user         | 3874                        | 1 [Reference]                            | 1 [Reference]                           | 1571                           | 1 [Reference]                            | 1 [Reference]                           | 1507                            | 1 [Reference]                            | 1 [Reference]                           |
| Ever-user        | 2787                        | 1.04 (0.99-1.09)                         | 1.00 (0.95-1.05)                        | 1065                           | 1.08 (1.00-1.17)                         | 1.05 (0.97-1.14)                        | 1290                            | 1.02 (0.95-1.10)                         | 1.00 (0.93-1.08)                        |
| <b>1992-2012</b> |                             |                                          |                                         |                                |                                          |                                         |                                 |                                          |                                         |
| Non-user         | 3233                        | 1 [Reference]                            | 1 [Reference]                           | 1309                           | 1 [Reference]                            | 1 [Reference]                           | 1254                            | 1 [Reference]                            | 1 [Reference]                           |
| Ever-user        | 2288                        | 1.03 (0.97-1.08)                         | 0.99 (0.94-1.05)                        | 868                            | 1.06 (0.97-1.15)                         | 1.04 (0.95-1.14)                        | 1067                            | 1.02 (0.94-1.10)                         | 1.00 (0.92-1.09)                        |
| <b>1998-2012</b> |                             |                                          |                                         |                                |                                          |                                         |                                 |                                          |                                         |
| Non-user         | 2101                        | 1 [Reference]                            | 1 [Reference]                           | 881                            | 1 [Reference]                            | 1 [Reference]                           | 798                             | 1 [Reference]                            | 1 [Reference]                           |
| Ever-user        | 1497                        | 1.04 (0.98-1.12)                         | 1.00 (0.93-1.07)                        | 578                            | 1.07 (0.96-1.19)                         | 1.04 (0.93-1.16)                        | 677                             | 1.02 (0.92-1.13)                         | 0.99 (0.89-1.10)                        |
| <b>2002-2012</b> |                             |                                          |                                         |                                |                                          |                                         |                                 |                                          |                                         |
| Non-user         | 1280                        | 1 [Reference]                            | 1 [Reference]                           | 540                            | 1 [Reference]                            | 1 [Reference]                           | 492                             | 1 [Reference]                            | 1 [Reference]                           |
| Ever-user        | 882                         | 1.02 (0.93-1.11)                         | 0.98 (0.90-1.07)                        | 360                            | 1.09 (0.95-1.25)                         | 1.06 (0.92-1.21)                        | 382                             | 0.93 (0.81-1.07)                         | 0.92 (0.80-1.06)                        |

MV: multivariable; HR: hazard ratio; CI: confidence interval; BMI: body mass index

<sup>a</sup> Including participants whose natural hair color was black, dark brown, red, blond, or light brown, or who had missing information on natural hair color.

<sup>b</sup> Dark natural hair color: black and dark brown.

<sup>c</sup> Light natural hair color: red, blond, and light brown.

<sup>d</sup> Participants were excluded from stratified analyses if they had missing information on natural hair color. The number of cases among “dark hair color” and “light hair color” women does not sum to the total number of cases in “any hair color” women due to the inclusion of women with missing hair color information in the “any hair color” group.

<sup>e</sup> Models were adjusted for age and follow-up cycle.

<sup>f</sup> Models were additionally adjusted for race, natural hair color, cumulative average BMI, BMI at age 18, smoking status, pack-years of smoking, alcohol intake, menopausal status, postmenopausal hormone use, oral contraceptive use, adolescent body size, age at menarche, age at first birth, parity, breastfeeding, first-degree family history of breast cancer, history of benign breast disease, and current mammography use. In analyses stratified by natural hair color, models were not further adjusted for natural hair color.

**Supplementary Table 35.** Age-adjusted and multivariable (MV)-adjusted hazard ratios (HR) and 95% confidence intervals (CI) of **breast cancer incidence** among women in the NHS according to cumulative dose of permanent hair dye use <sup>a</sup> and natural hair color, obtained from Cox models with updated covariate values (assuming a latency of 6, 10, 16 and 20 years)

| Breast cancer                          | Any hair color <sup>b</sup> |                                          |                                         | Dark hair color <sup>c,e</sup> |                                          |                                         | Light hair color <sup>d,e</sup> |                                          |                                         |
|----------------------------------------|-----------------------------|------------------------------------------|-----------------------------------------|--------------------------------|------------------------------------------|-----------------------------------------|---------------------------------|------------------------------------------|-----------------------------------------|
|                                        | No. of cases                | Age-adjusted <sup>f</sup><br>HR (95% CI) | MV-adjusted <sup>g</sup><br>HR (95% CI) | No. of cases                   | Age-adjusted <sup>f</sup><br>HR (95% CI) | MV-adjusted <sup>g</sup><br>HR (95% CI) | No. of cases                    | Age-adjusted <sup>f</sup><br>HR (95% CI) | MV-adjusted <sup>g</sup><br>HR (95% CI) |
| <b>1976-2012</b>                       |                             |                                          |                                         |                                |                                          |                                         |                                 |                                          |                                         |
| Non-user                               | 5332                        | 1 [Reference]                            | 1 [Reference]                           | 2117                           | 1 [Reference]                            | 1 [Reference]                           | 2084                            | 1 [Reference]                            | 1 [Reference]                           |
| 1-99 times                             | 1884                        | 1.04 (0.98-1.09)                         | 1.00 (0.95-1.06)                        | 741                            | 1.09 (1.00-1.18)                         | 1.07 (0.98-1.17)                        | 833                             | 0.99 (0.91-1.07)                         | 0.96 (0.88-1.05)                        |
| 100-199 times                          | 972                         | 1.03 (0.96-1.10)                         | 0.99 (0.92-1.06)                        | 384                            | 1.04 (0.93-1.16)                         | 1.01 (0.90-1.13)                        | 447                             | 1.00 (0.90-1.11)                         | 0.98 (0.89-1.09)                        |
| ≥200 times                             | 1064                        | 1.12 (1.04-1.19)                         | 1.08 (1.01-1.16)                        | 323                            | 1.09 (0.97-1.23)                         | 1.04 (0.92-1.17)                        | 538                             | 1.19 (1.08-1.31)                         | 1.16 (1.05-1.28)                        |
| <i>P</i> -value for trend <sup>h</sup> |                             | .001                                     | .06                                     |                                | .14                                      | .57                                     |                                 | .001                                     | .007                                    |
| Per 50-time<br>increment               |                             | 1.01 (1.00-1.01)                         | 1.00 (1.00-1.01)                        |                                | 1.01 (1.00-1.02)                         | 1.01 (0.99-1.02)                        |                                 | 1.01 (1.00-1.02)                         | 1.01 (1.00-1.02)                        |
| <i>P</i> -value for trend <sup>i</sup> |                             | .05                                      | .17                                     |                                | .14                                      | .39                                     |                                 | .006                                     | .02                                     |
| <b>1988-2012</b>                       |                             |                                          |                                         |                                |                                          |                                         |                                 |                                          |                                         |
| Non-user                               | 3874                        | 1 [Reference]                            | 1 [Reference]                           | 1571                           | 1 [Reference]                            | 1 [Reference]                           | 1507                            | 1 [Reference]                            | 1 [Reference]                           |
| 1-99 times                             | 1357                        | 1.02 (0.96-1.08)                         | 0.98 (0.92-1.04)                        | 536                            | 1.05 (0.95-1.16)                         | 1.04 (0.94-1.15)                        | 608                             | 0.98 (0.89-1.08)                         | 0.95 (0.86-1.05)                        |
| 100-199 times                          | 696                         | 1.03 (0.95-1.12)                         | 0.98 (0.90-1.07)                        | 290                            | 1.08 (0.95-1.23)                         | 1.06 (0.93-1.20)                        | 318                             | 0.99 (0.88-1.12)                         | 0.98 (0.87-1.11)                        |
| ≥200 times                             | 734                         | 1.10 (1.01-1.19)                         | 1.07 (0.99-1.16)                        | 239                            | 1.14 (0.99-1.31)                         | 1.09 (0.94-1.25)                        | 364                             | 1.13 (1.01-1.27)                         | 1.12 (0.99-1.26)                        |
| <i>P</i> -value for trend <sup>h</sup> |                             | .02                                      | .16                                     |                                | .04                                      | .19                                     |                                 | .06                                      | .10                                     |
| Per 50-time<br>increment               |                             | 1.00 (1.00-1.01)                         | 1.00 (1.00-1.01)                        |                                | 1.01 (1.00-1.02)                         | 1.01 (1.00-1.02)                        |                                 | 1.01 (1.00-1.02)                         | 1.01 (1.00-1.02)                        |
| <i>P</i> -value for trend <sup>i</sup> |                             | .21                                      | .27                                     |                                | .07                                      | .17                                     |                                 | .12                                      | .15                                     |
| <b>1992-2012</b>                       |                             |                                          |                                         |                                |                                          |                                         |                                 |                                          |                                         |
| Non-user                               | 3233                        | 1 [Reference]                            | 1 [Reference]                           | 1309                           | 1 [Reference]                            | 1 [Reference]                           | 1254                            | 1 [Reference]                            | 1 [Reference]                           |
| 1-99 times                             | 1134                        | 1.01 (0.95-1.09)                         | 0.98 (0.91-1.05)                        | 446                            | 1.04 (0.93-1.16)                         | 1.03 (0.92-1.15)                        | 515                             | 1.00 (0.90-1.11)                         | 0.97 (0.87-1.08)                        |
| 100-199 times                          | 574                         | 1.03 (0.94-1.12)                         | 0.98 (0.89-1.08)                        | 244                            | 1.11 (0.97-1.28)                         | 1.09 (0.94-1.26)                        | 263                             | 0.99 (0.86-1.13)                         | 0.98 (0.86-1.13)                        |
| ≥200 times                             | 580                         | 1.05 (0.96-1.15)                         | 1.03 (0.94-1.13)                        | 178                            | 1.04 (0.89-1.22)                         | 1.00 (0.85-1.18)                        | 289                             | 1.09 (0.95-1.23)                         | 1.08 (0.95-1.23)                        |
| <i>P</i> -value for trend <sup>h</sup> |                             | .23                                      | .61                                     |                                | .31                                      | .66                                     |                                 | .28                                      | .31                                     |

|                                        |      |                  |                  |     |                  |                  |     |                  |                  |
|----------------------------------------|------|------------------|------------------|-----|------------------|------------------|-----|------------------|------------------|
| Per 50-time increment                  |      | 1.00 (0.99-1.01) | 1.00 (0.99-1.01) |     | 1.01 (0.99-1.02) | 1.00 (0.99-1.02) |     | 1.01 (0.99-1.02) | 1.01 (0.99-1.02) |
| <i>P</i> -value for trend <sup>i</sup> |      | .63              | .64              |     | .43              | .65              |     | .41              | .37              |
| <b>1998-2012</b>                       |      |                  |                  |     |                  |                  |     |                  |                  |
| Non-user                               | 2101 | 1 [Reference]    | 1 [Reference]    | 881 | 1 [Reference]    | 1 [Reference]    | 798 | 1 [Reference]    | 1 [Reference]    |
| 1-99 times                             | 753  | 1.03 (0.95-1.12) | 0.99 (0.91-1.08) | 294 | 1.02 (0.89-1.17) | 1.00 (0.87-1.15) | 333 | 1.00 (0.88-1.14) | 0.96 (0.84-1.10) |
| 100-199 times                          | 359  | 1.01 (0.90-1.13) | 0.95 (0.84-1.06) | 155 | 1.08 (0.91-1.29) | 1.04 (0.87-1.24) | 166 | 0.99 (0.84-1.17) | 0.99 (0.83-1.17) |
| ≥200 times                             | 385  | 1.10 (0.99-1.23) | 1.08 (0.97-1.21) | 129 | 1.18 (0.98-1.43) | 1.12 (0.92-1.36) | 178 | 1.06 (0.90-1.26) | 1.05 (0.88-1.24) |
| <i>P</i> -value for trend <sup>h</sup> |      | .11              | .36              |     | .06              | .24              |     | .52              | .63              |
| Per 50-time increment                  |      | 1.00 (0.99-1.01) | 1.00 (0.99-1.02) |     | 1.01 (1.00-1.03) | 1.01 (0.99-1.03) |     | 1.00 (0.98-1.02) | 1.00 (0.98-1.02) |
| <i>P</i> -value for trend <sup>i</sup> |      | .52              | .47              |     | .12              | .19              |     | .97              | .96              |
| <b>2002-2012</b>                       |      |                  |                  |     |                  |                  |     |                  |                  |
| Non-user                               | 1280 | 1 [Reference]    | 1 [Reference]    | 540 | 1 [Reference]    | 1 [Reference]    | 492 | 1 [Reference]    | 1 [Reference]    |
| 1-99 times                             | 450  | 1.01 (0.91-1.13) | 0.97 (0.87-1.08) | 189 | 1.06 (0.89-1.25) | 1.03 (0.87-1.22) | 188 | 0.91 (0.77-1.08) | 0.89 (0.75-1.06) |
| 100-199 times                          | 207  | 0.97 (0.83-1.12) | 0.92 (0.79-1.07) | 98  | 1.13 (0.91-1.40) | 1.09 (0.87-1.35) | 89  | 0.87 (0.69-1.09) | 0.87 (0.69-1.10) |
| ≥200 times                             | 225  | 1.09 (0.94-1.25) | 1.08 (0.94-1.25) | 73  | 1.14 (0.89-1.46) | 1.09 (0.85-1.40) | 105 | 1.04 (0.84-1.28) | 1.04 (0.84-1.29) |
| <i>P</i> -value for trend <sup>h</sup> |      | .39              | .55              |     | .19              | .38              |     | .96              | .95              |
| Per 50-time increment                  |      | 1.00 (0.99-1.01) | 1.00 (0.99-1.02) |     | 1.01 (1.00-1.02) | 1.01 (1.00-1.03) |     | 1.00 (0.99-1.02) | 1.01 (0.99-1.02) |
| <i>P</i> -value for trend <sup>i</sup> |      | .54              | .36              |     | .13              | .16              |     | .56              | .42              |

MV: multivariable; HR: hazard ratio; CI: confidence interval; BMI: body mass index

<sup>a</sup> Cumulative dose is the product of average frequency of use (times per year) multiplied by duration of use (years).

<sup>b</sup> Including participants whose natural hair color was black, dark brown, red, blond, or light brown, or who had missing information on natural hair color.

<sup>c</sup> Dark natural hair color: black and dark brown.

<sup>d</sup> Light natural hair color: red, blond, and light brown.

<sup>e</sup> Participants were excluded from stratified analyses if they had missing information on natural hair color. The number of cases among “dark hair color” and “light hair color” women does not sum to the total number of cases in “any hair color” women due to the inclusion of women with missing hair color information in the “any hair color” group.

<sup>f</sup> Models were adjusted for age and follow-up cycle.

<sup>g</sup> Models were additionally adjusted for race, natural hair color, cumulative average BMI, BMI at age 18, smoking status, pack-years of smoking, alcohol intake, menopausal status, postmenopausal hormone use, oral contraceptive use, adolescent body size, age at menarche, age at first birth, parity, breastfeeding, first-degree family history of breast cancer, history of benign breast disease, and current mammography use. In analyses stratified by natural hair color, models were not further adjusted for natural hair color.

<sup>h</sup> *P*-value for trend was calculated using the mid-point of each category of cumulative dose in times.

<sup>i</sup> *P*-value for trend was calculated using cumulative dose in times as continuous.

**Supplementary Table 36.** Age-adjusted and multivariable (MV)-adjusted hazard ratios (HR) and 95% confidence intervals (CI) of **ovarian cancer incidence** among women in the NHS according to status of personal use of permanent hair dyes and natural hair color, obtained from Cox models with updated covariate values (assuming a latency of 6, 10, 16 and 20 years)

| Ovarian cancer   | Any hair color <sup>a</sup> |                                          |                                         | Dark hair color <sup>b,d</sup> |                                          |                                         | Light hair color <sup>c,d</sup> |                                          |                                         |
|------------------|-----------------------------|------------------------------------------|-----------------------------------------|--------------------------------|------------------------------------------|-----------------------------------------|---------------------------------|------------------------------------------|-----------------------------------------|
|                  | No. of cases                | Age-adjusted <sup>e</sup><br>HR (95% CI) | MV-adjusted <sup>f</sup><br>HR (95% CI) | No. of cases                   | Age-adjusted <sup>e</sup><br>HR (95% CI) | MV-adjusted <sup>f</sup><br>HR (95% CI) | No. of cases                    | Age-adjusted <sup>e</sup><br>HR (95% CI) | MV-adjusted <sup>f</sup><br>HR (95% CI) |
| <b>1976-2012</b> |                             |                                          |                                         |                                |                                          |                                         |                                 |                                          |                                         |
| Non-user         | 687                         | 1 [Reference]                            | 1 [Reference]                           | 256                            | 1 [Reference]                            | 1 [Reference]                           | 267                             | 1 [Reference]                            | 1 [Reference]                           |
| Ever-user        | 528                         | 1.09 (0.98-1.23)                         | 1.09 (0.97-1.22)                        | 193                            | 1.17 (0.97-1.41)                         | 1.21 (1.00-1.47)                        | 242                             | 1.08 (0.90-1.28)                         | 1.06 (0.89-1.27)                        |
| <b>1988-2012</b> |                             |                                          |                                         |                                |                                          |                                         |                                 |                                          |                                         |
| Non-user         | 497                         | 1 [Reference]                            | 1 [Reference]                           | 204                            | 1 [Reference]                            | 1 [Reference]                           | 192                             | 1 [Reference]                            | 1 [Reference]                           |
| Ever-user        | 384                         | 1.10 (0.96-1.26)                         | 1.09 (0.95-1.24)                        | 141                            | 1.07 (0.86-1.34)                         | 1.10 (0.88-1.37)                        | 193                             | 1.20 (0.98-1.46)                         | 1.18 (0.96-1.45)                        |
| <b>1992-2012</b> |                             |                                          |                                         |                                |                                          |                                         |                                 |                                          |                                         |
| Non-user         | 411                         | 1 [Reference]                            | 1 [Reference]                           | 172                            | 1 [Reference]                            | 1 [Reference]                           | 157                             | 1 [Reference]                            | 1 [Reference]                           |
| Ever-user        | 324                         | 1.14 (0.98-1.32)                         | 1.12 (0.96-1.30)                        | 118                            | 1.07 (0.85-1.36)                         | 1.09 (0.86-1.39)                        | 164                             | 1.27 (1.02-1.59)                         | 1.26 (1.01-1.58)                        |
| <b>1998-2012</b> |                             |                                          |                                         |                                |                                          |                                         |                                 |                                          |                                         |
| Non-user         | 281                         | 1 [Reference]                            | 1 [Reference]                           | 125                            | 1 [Reference]                            | 1 [Reference]                           | 108                             | 1 [Reference]                            | 1 [Reference]                           |
| Ever-user        | 216                         | 1.10 (0.92-1.32)                         | 1.06 (0.89-1.28)                        | 73                             | 0.92 (0.68-1.23)                         | 0.91 (0.68-1.23)                        | 118                             | 1.28 (0.98-1.67)                         | 1.27 (0.97-1.66)                        |
| <b>2002-2012</b> |                             |                                          |                                         |                                |                                          |                                         |                                 |                                          |                                         |
| Non-user         | 191                         | 1 [Reference]                            | 1 [Reference]                           | 88                             | 1 [Reference]                            | 1 [Reference]                           | 71                              | 1 [Reference]                            | 1 [Reference]                           |
| Ever-user        | 150                         | 1.14 (0.92-1.41)                         | 1.11 (0.89-1.38)                        | 54                             | 0.99 (0.70-1.39)                         | 1.02 (0.72-1.44)                        | 81                              | 1.35 (0.98-1.86)                         | 1.32 (0.95-1.83)                        |

MV: multivariable; HR: hazard ratio; CI: confidence interval; BMI: body mass index

<sup>a</sup> Including participants whose natural hair color was black, dark brown, red, blond, or light brown, or who had missing information on natural hair color.

<sup>b</sup> Dark natural hair color: black and dark brown.

<sup>c</sup> Light natural hair color: red, blond, and light brown.

<sup>d</sup> Participants were excluded from stratified analyses if they had missing information on natural hair color. The number of cases among “dark hair color” and “light hair color” women does not sum to the total number of cases in “any hair color” women due to the inclusion of women with missing hair color information in the “any hair color” group.

<sup>e</sup> Models were adjusted for age and follow-up cycle.

<sup>f</sup> Models were additionally adjusted for race, natural hair color, cumulative average BMI, BMI at age 18, smoking status, pack-years of smoking, alcohol intake, menopausal status, postmenopausal hormone use, age at menarche, oral contraceptive use, and parity. In analyses stratified by natural hair color, models were not further adjusted for natural hair color.

**Supplementary Table 37.** Age-adjusted and multivariable (MV)-adjusted hazard ratios (HR) and 95% confidence intervals (CI) of **ovarian cancer incidence** among women in the NHS according to cumulative dose of permanent hair dye use <sup>a</sup> and natural hair color, obtained from Cox models with updated covariate values (assuming a latency of 6, 10, 16 and 20 years)

| Ovarian cancer                         | Any hair color <sup>b</sup> |                           |                          | Dark hair color <sup>c,e</sup> |                           |                          | Light hair color <sup>d,e</sup> |                           |                          |
|----------------------------------------|-----------------------------|---------------------------|--------------------------|--------------------------------|---------------------------|--------------------------|---------------------------------|---------------------------|--------------------------|
|                                        | No. of cases                | Age-adjusted <sup>f</sup> | MV-adjusted <sup>g</sup> | No. of cases                   | Age-adjusted <sup>f</sup> | MV-adjusted <sup>g</sup> | No. of cases                    | Age-adjusted <sup>f</sup> | MV-adjusted <sup>g</sup> |
|                                        |                             | HR (95% CI)               | HR (95% CI)              |                                | HR (95% CI)               | HR (95% CI)              |                                 | HR (95% CI)               | HR (95% CI)              |
| <b>1976-2012</b>                       |                             |                           |                          |                                |                           |                          |                                 |                           |                          |
| Non-user                               | 687                         | 1 [Reference]             | 1 [Reference]            | 256                            | 1 [Reference]             | 1 [Reference]            | 267                             | 1 [Reference]             | 1 [Reference]            |
| 1-99 times                             | 231                         | 0.99 (0.86-1.15)          | 1.00 (0.86-1.16)         | 89                             | 1.06 (0.83-1.36)          | 1.10 (0.86-1.41)         | 95                              | 0.89 (0.70-1.12)          | 0.89 (0.70-1.13)         |
| 100-199 times                          | 149                         | 1.21 (1.01-1.44)          | 1.20 (1.01-1.44)         | 58                             | 1.31 (0.98-1.75)          | 1.36 (1.02-1.82)         | 72                              | 1.23 (0.94-1.60)          | 1.21 (0.93-1.57)         |
| ≥200 times                             | 148                         | 1.17 (0.97-1.39)          | 1.15 (0.96-1.37)         | 46                             | 1.24 (0.90-1.71)          | 1.28 (0.93-1.77)         | 75                              | 1.27 (0.98-1.65)          | 1.24 (0.95-1.61)         |
| <i>P</i> -value for trend <sup>h</sup> |                             | .03                       | .046                     |                                | .07                       | .04                      |                                 | .03                       | .047                     |
| Per 50-time increment                  |                             | 1.01 (0.99-1.02)          | 1.01 (0.99-1.02)         |                                | 1.03 (0.99-1.06)          | 1.03 (1.00-1.06)         |                                 | 1.02 (1.00-1.04)          | 1.02 (0.99-1.04)         |
| <i>P</i> -value for trend <sup>i</sup> |                             | .24                       | .33                      |                                | .13                       | .09                      |                                 | .11                       | .16                      |
| <b>1988-2012</b>                       |                             |                           |                          |                                |                           |                          |                                 |                           |                          |
| Non-user                               | 497                         | 1 [Reference]             | 1 [Reference]            | 204                            | 1 [Reference]             | 1 [Reference]            | 192                             | 1 [Reference]             | 1 [Reference]            |
| 1-99 times                             | 168                         | 0.99 (0.83-1.17)          | 0.97 (0.81-1.16)         | 67                             | 0.98 (0.75-1.30)          | 1.02 (0.77-1.35)         | 73                              | 0.94 (0.71-1.23)          | 0.93 (0.71-1.23)         |
| 100-199 times                          | 114                         | 1.29 (1.05-1.58)          | 1.26 (1.03-1.55)         | 45                             | 1.29 (0.93-1.79)          | 1.30 (0.93-1.81)         | 59                              | 1.42 (1.05-1.90)          | 1.39 (1.03-1.88)         |
| ≥200 times                             | 102                         | 1.14 (0.92-1.41)          | 1.14 (0.92-1.42)         | 29                             | 1.02 (0.69-1.52)          | 1.03 (0.69-1.54)         | 61                              | 1.46 (1.09-1.95)          | 1.44 (1.07-1.94)         |
| <i>P</i> -value for trend <sup>h</sup> |                             | .06                       | .07                      |                                | .48                       | .46                      |                                 | .002                      | .003                     |
| Per 50-time increment                  |                             | 1.01 (0.99-1.03)          | 1.01 (0.99-1.03)         |                                | 1.00 (0.95-1.04)          | 1.00 (0.95-1.04)         |                                 | 1.03 (1.01-1.05)          | 1.03 (1.01-1.05)         |
| <i>P</i> -value for trend <sup>i</sup> |                             | .50                       | .46                      |                                | .88                       | .88                      |                                 | .01                       | .01                      |
| <b>1992-2012</b>                       |                             |                           |                          |                                |                           |                          |                                 |                           |                          |
| Non-user                               | 411                         | 1 [Reference]             | 1 [Reference]            | 172                            | 1 [Reference]             | 1 [Reference]            | 157                             | 1 [Reference]             | 1 [Reference]            |
| 1-99 times                             | 148                         | 1.06 (0.88-1.28)          | 1.04 (0.86-1.26)         | 60                             | 1.06 (0.78-1.42)          | 1.09 (0.81-1.46)         | 65                              | 1.04 (0.78-1.39)          | 1.04 (0.78-1.40)         |
| 100-199 times                          | 91                          | 1.25 (1.00-1.58)          | 1.22 (0.97-1.53)         | 35                             | 1.20 (0.83-1.73)          | 1.20 (0.83-1.74)         | 47                              | 1.41 (1.02-1.96)          | 1.39 (1.00-1.94)         |
| ≥200 times                             | 95                          | 1.18 (0.93-1.49)          | 1.17 (0.92-1.49)         | 23                             | 0.97 (0.62-1.51)          | 0.98 (0.63-1.53)         | 52                              | 1.57 (1.14-2.15)          | 1.55 (1.13-2.13)         |

|                                        |     |                  |                  |     |                  |                  |     |                  |                  |
|----------------------------------------|-----|------------------|------------------|-----|------------------|------------------|-----|------------------|------------------|
| <i>P</i> -value for trend <sup>h</sup> |     | .06              | .09              |     | .79              | .76              |     | .002             | .003             |
| Per 50-time increment                  |     | 1.01 (0.99-1.03) | 1.01 (0.99-1.03) |     | 0.98 (0.93-1.04) | 0.98 (0.93-1.04) |     | 1.03 (1.01-1.05) | 1.03 (1.00-1.05) |
| <i>P</i> -value for trend <sup>i</sup> |     | .56              | .52              |     | .55              | .56              |     | .01              | .02              |
| <b>1998-2012</b>                       |     |                  |                  |     |                  |                  |     |                  |                  |
| Non-user                               | 281 | 1 [Reference]    | 1 [Reference]    | 125 | 1 [Reference]    | 1 [Reference]    | 108 | 1 [Reference]    | 1 [Reference]    |
| 1-99 times                             | 97  | 0.99 (0.79-1.25) | 0.96 (0.76-1.21) | 39  | 0.92 (0.64-1.33) | 0.93 (0.65-1.35) | 46  | 1.01 (0.71-1.43) | 1.01 (0.71-1.43) |
| 100-199 times                          | 58  | 1.18 (0.89-1.57) | 1.12 (0.84-1.50) | 20  | 0.98 (0.61-1.58) | 0.96 (0.59-1.55) | 33  | 1.43 (0.96-2.11) | 1.41 (0.95-2.09) |
| ≥200 times                             | 61  | 1.25 (0.94-1.65) | 1.22 (0.92-1.63) | 14  | 0.83 (0.47-1.45) | 0.81 (0.46-1.43) | 39  | 1.67 (1.15-2.44) | 1.67 (1.14-2.44) |
| <i>P</i> -value for trend <sup>h</sup> |     | .08              | .12156           |     | .53              | .48              |     | .003             | .003             |
| Per 50-time increment                  |     | 1.01 (0.99-1.03) | 1.01 (0.99-1.03) |     | 0.97 (0.90-1.04) | 0.96 (0.90-1.03) |     | 1.03 (1.01-1.05) | 1.03 (1.00-1.05) |
| <i>P</i> -value for trend <sup>i</sup> |     | .38              | .40              |     | .33              | .29              |     | .02              | .02              |
| <b>2002-2012</b>                       |     |                  |                  |     |                  |                  |     |                  |                  |
| Non-user                               | 191 | 1 [Reference]    | 1 [Reference]    | 88  | 1 [Reference]    | 1 [Reference]    | 71  | 1 [Reference]    | 1 [Reference]    |
| 1-99 times                             | 73  | 1.10 (0.84-1.44) | 1.07 (0.81-1.41) | 30  | 1.00 (0.66-1.53) | 1.04 (0.68-1.59) | 35  | 1.16 (0.77-1.74) | 1.15 (0.76-1.74) |
| 100-199 times                          | 34  | 1.02 (0.71-1.47) | 0.98 (0.68-1.41) | 14  | 1.02 (0.58-1.81) | 1.05 (0.59-1.87) | 17  | 1.14 (0.67-1.94) | 1.07 (0.62-1.84) |
| ≥200 times                             | 43  | 1.33 (0.95-1.87) | 1.33 (0.94-1.87) | 10  | 0.90 (0.46-1.76) | 0.91 (0.47-1.79) | 29  | 1.98 (1.27-3.10) | 1.94 (1.23-3.04) |
| <i>P</i> -value for trend <sup>h</sup> |     | .13              | .16              |     | .82              | .88              |     | .004             | .008             |
| Per 50-time increment                  |     | 1.01 (0.99-1.03) | 1.01 (0.99-1.03) |     | 0.97 (0.91-1.04) | 0.98 (0.92-1.04) |     | 1.03 (1.01-1.06) | 1.03 (1.01-1.05) |
| <i>P</i> -value for trend <sup>i</sup> |     | .25              | .19              |     | .45              | .48              |     | .006             | .01              |

MV: multivariable; HR: hazard ratio; CI: confidence interval; BMI: body mass index

<sup>a</sup> Cumulative dose is the product of average frequency of use (times per year) multiplied by duration of use (years).

<sup>b</sup> Including participants whose natural hair color was black, dark brown, red, blond, or light brown, or who had missing information on natural hair color.

<sup>c</sup> Dark natural hair color: black and dark brown.

<sup>d</sup> Light natural hair color: red, blond, and light brown.

<sup>e</sup> Participants were excluded from stratified analyses if they had missing information on natural hair color. The number of cases among “dark hair color” and “light hair color” women does not sum to the total number of cases in “any hair color” women due to the inclusion of women with missing hair color information in the “any hair color” group.

<sup>f</sup> Models were adjusted for age and follow-up cycle.

<sup>g</sup> Models were additionally adjusted for race, natural hair color, cumulative average BMI, BMI at age 18, smoking status, pack-years of smoking, alcohol intake, menopausal status, postmenopausal hormone use, age at menarche, oral contraceptive use, and parity. In analyses stratified by natural hair color, models were not further adjusted for natural hair color.

<sup>h</sup> *P*-value for trend was calculated using the mid-point of each category of cumulative dose in times.

<sup>i</sup> *P*-value for trend was calculated using cumulative dose in times as continuous.

**Supplementary Table 38.** Age-adjusted and multivariable (MV)-adjusted hazard ratios (HR) and 95% confidence intervals (CI) of **overall cancer incidence** \* among women in the NHS according to status of personal use of permanent hair dyes and natural hair color, obtained from Cox models with updated covariate values (restricting follow-up to the first 10 and 20 years after exposure assessments stopped)

| All cancers *    | Any hair color <sup>a</sup> |                                          |                                         | Dark hair color <sup>b,d</sup> |                                          |                                         | Light hair color <sup>c,d</sup> |                                          |                                         |
|------------------|-----------------------------|------------------------------------------|-----------------------------------------|--------------------------------|------------------------------------------|-----------------------------------------|---------------------------------|------------------------------------------|-----------------------------------------|
|                  | No. of cases                | Age-adjusted <sup>e</sup><br>HR (95% CI) | MV-adjusted <sup>f</sup><br>HR (95% CI) | No. of cases                   | Age-adjusted <sup>e</sup><br>HR (95% CI) | MV-adjusted <sup>f</sup><br>HR (95% CI) | No. of cases                    | Age-adjusted <sup>e</sup><br>HR (95% CI) | MV-adjusted <sup>f</sup><br>HR (95% CI) |
| <b>1976-1992</b> |                             |                                          |                                         |                                |                                          |                                         |                                 |                                          |                                         |
| Non-user         | 4448                        | 1 [Reference]                            | 1 [Reference]                           | 1582                           | 1 [Reference]                            | 1 [Reference]                           | 1717                            | 1 [Reference]                            | 1 [Reference]                           |
| Ever-user        | 3091                        | 1.01 (0.96-1.06)                         | 0.99 (0.94-1.03)                        | 1027                           | 1.02 (0.94-1.10)                         | 1.00 (0.92-1.08)                        | 1369                            | 0.98 (0.91-1.05)                         | 0.96 (0.90-1.04)                        |
| <b>1976-2002</b> |                             |                                          |                                         |                                |                                          |                                         |                                 |                                          |                                         |
| Non-user         | 9275                        | 1 [Reference]                            | 1 [Reference]                           | 3428                           | 1 [Reference]                            | 1 [Reference]                           | 3649                            | 1 [Reference]                            | 1 [Reference]                           |
| Ever-user        | 6516                        | 1.01 (0.98-1.04)                         | 0.98 (0.95-1.01)                        | 2257                           | 1.02 (0.97-1.08)                         | 1.00 (0.95-1.06)                        | 2972                            | 0.98 (0.93-1.03)                         | 0.96 (0.91-1.01)                        |
| <b>1976-2012</b> |                             |                                          |                                         |                                |                                          |                                         |                                 |                                          |                                         |
| Non-user         | 13245                       | 1 [Reference]                            | 1 [Reference]                           | 5067                           | 1 [Reference]                            | 1 [Reference]                           | 5134                            | 1 [Reference]                            | 1 [Reference]                           |
| Ever-user        | 9367                        | 1.01 (0.99-1.04)                         | 0.98 (0.96-1.01)                        | 3322                           | 1.02 (0.98-1.07)                         | 1.00 (0.96-1.05)                        | 4283                            | 1.00 (0.96-1.04)                         | 0.98 (0.94-1.02)                        |

MV: multivariable; HR: hazard ratio; CI: confidence interval; BMI: body mass index

\* Not including basal cell carcinoma and cutaneous squamous cell carcinoma.

<sup>a</sup> Including participants whose natural hair color was black, dark brown, red, blond, or light brown, or who had missing information on natural hair color.

<sup>b</sup> Dark natural hair color: black and dark brown.

<sup>c</sup> Light natural hair color: red, blond, and light brown.

<sup>d</sup> Participants were excluded from stratified analyses if they had missing information on natural hair color. The number of cases among “dark hair color” and “light hair color” women does not sum to the total number of cases in “any hair color” women due to the inclusion of women with missing hair color information in the “any hair color” group.

<sup>e</sup> Models were adjusted for age and follow-up cycle.

<sup>f</sup> Models were additionally adjusted for race, natural hair color, cumulative average BMI, BMI at age 18, smoking status, pack-years of smoking, and alcohol intake. In analyses stratified by natural hair color, models were not further adjusted for natural hair color.

**Supplementary Table 39.** Age-adjusted and multivariable (MV)-adjusted hazard ratios (HR) and 95% confidence intervals (CI) of **overall cancer incidence** \* among women in the NHS according to cumulative dose of permanent hair dye use <sup>a</sup> and natural hair color, obtained from Cox models with updated covariate values (restricting follow-up to the first 10 and 20 years after exposure assessments stopped)

| All cancers *                          | Any hair color <sup>b</sup> |                           |                          | Dark hair color <sup>c,e</sup> |                           |                          | Light hair color <sup>d,e</sup> |                           |                          |
|----------------------------------------|-----------------------------|---------------------------|--------------------------|--------------------------------|---------------------------|--------------------------|---------------------------------|---------------------------|--------------------------|
|                                        | No. of cases                | Age-adjusted <sup>f</sup> | MV-adjusted <sup>g</sup> | No. of cases                   | Age-adjusted <sup>f</sup> | MV-adjusted <sup>g</sup> | No. of cases                    | Age-adjusted <sup>f</sup> | MV-adjusted <sup>g</sup> |
|                                        |                             | HR (95% CI)               | HR (95% CI)              |                                | HR (95% CI)               | HR (95% CI)              |                                 | HR (95% CI)               | HR (95% CI)              |
| <b>1976-1992</b>                       |                             |                           |                          |                                |                           |                          |                                 |                           |                          |
| Non-user                               | 4448                        | 1 [Reference]             | 1 [Reference]            | 1582                           | 1 [Reference]             | 1 [Reference]            | 1717                            | 1 [Reference]             | 1 [Reference]            |
| 1-99 times                             | 1387                        | 0.98 (0.92-1.04)          | 0.96 (0.90-1.02)         | 477                            | 1.00 (0.90-1.11)          | 0.99 (0.89-1.10)         | 615                             | 0.95 (0.87-1.04)          | 0.94 (0.85-1.03)         |
| 100-199 times                          | 791                         | 1.00 (0.93-1.08)          | 0.98 (0.91-1.06)         | 299                            | 1.04 (0.92-1.18)          | 1.02 (0.90-1.16)         | 335                             | 0.92 (0.81-1.03)          | 0.91 (0.81-1.02)         |
| ≥200 times                             | 913                         | 1.06 (0.99-1.14)          | 1.04 (0.97-1.12)         | 251                            | 1.01 (0.88-1.16)          | 0.99 (0.87-1.13)         | 419                             | 1.08 (0.97-1.20)          | 1.06 (0.95-1.18)         |
| <i>P</i> -value for trend <sup>h</sup> |                             | .14                       | .40                      |                                | .69                       | .98                      |                                 | .38                       | .54                      |
| Per 50-time increment                  |                             | 1.00 (1.00-1.01)          | 1.00 (1.00-1.01)         |                                | 1.00 (0.99-1.02)          | 1.00 (0.99-1.01)         |                                 | 1.01 (1.00-1.02)          | 1.00 (0.99-1.02)         |
| <i>P</i> -value for trend <sup>i</sup> |                             | .28                       | .53                      |                                | .78                       | .99                      |                                 | .27                       | .39                      |
| <b>1976-2002</b>                       |                             |                           |                          |                                |                           |                          |                                 |                           |                          |
| Non-user                               | 9275                        | 1 [Reference]             | 1 [Reference]            | 3428                           | 1 [Reference]             | 1 [Reference]            | 3649                            | 1 [Reference]             | 1 [Reference]            |
| 1-99 times                             | 3044                        | 1.00 (0.96-1.04)          | 0.96 (0.92-1.00)         | 1100                           | 1.03 (0.96-1.11)          | 1.01 (0.94-1.08)         | 1360                            | 0.95 (0.89-1.01)          | 0.93 (0.87-0.99)         |
| 100-199 times                          | 1691                        | 1.02 (0.96-1.07)          | 0.98 (0.93-1.04)         | 641                            | 1.04 (0.96-1.14)          | 1.02 (0.94-1.11)         | 763                             | 0.97 (0.90-1.05)          | 0.95 (0.88-1.03)         |
| ≥200 times                             | 1781                        | 1.02 (0.97-1.07)          | 1.00 (0.95-1.05)         | 516                            | 0.98 (0.89-1.07)          | 0.96 (0.87-1.05)         | 849                             | 1.05 (0.97-1.13)          | 1.02 (0.95-1.10)         |
| <i>P</i> -value for trend <sup>h</sup> |                             | .37                       | .81                      |                                | .93                       | .56                      |                                 | .34                       | .69                      |
| Per 50-time increment                  |                             | 1.00 (1.00-1.01)          | 1.00 (0.99-1.00)         |                                | 1.00 (0.99-1.01)          | 1.00 (0.99-1.01)         |                                 | 1.00 (1.00-1.01)          | 1.00 (0.99-1.01)         |
| <i>P</i> -value for trend <sup>i</sup> |                             | .52                       | .97                      |                                | .90                       | .65                      |                                 | .48                       | .83                      |
| <b>1976-2012</b>                       |                             |                           |                          |                                |                           |                          |                                 |                           |                          |
| Non-user                               | 13245                       | 1 [Reference]             | 1 [Reference]            | 5067                           | 1 [Reference]             | 1 [Reference]            | 5134                            | 1 [Reference]             | 1 [Reference]            |
| 1-99 times                             | 4492                        | 1.01 (0.98-1.05)          | 0.98 (0.94-1.01)         | 1678                           | 1.05 (0.99-1.11)          | 1.02 (0.96-1.08)         | 1988                            | 0.97 (0.92-1.02)          | 0.95 (0.90-1.00)         |
| 100-199 times                          | 2393                        | 1.01 (0.97-1.06)          | 0.98 (0.94-1.03)         | 904                            | 1.01 (0.94-1.09)          | 0.99 (0.92-1.06)         | 1109                            | 0.99 (0.93-1.06)          | 0.98 (0.92-1.05)         |
| ≥200 times                             | 2482                        | 1.02 (0.98-1.07)          | 1.00 (0.96-1.05)         | 740                            | 0.98 (0.91-1.06)          | 0.97 (0.90-1.05)         | 1186                            | 1.05 (0.99-1.12)          | 1.03 (0.97-1.10)         |

|                                        |                  |                  |                  |                  |                  |                  |
|----------------------------------------|------------------|------------------|------------------|------------------|------------------|------------------|
| <i>P</i> -value for trend <sup>h</sup> | .34              | .94              | .81              | .47              | .14              | .36              |
| Per 50-time increment                  | 1.00 (1.00-1.00) | 1.00 (0.99-1.00) | 1.00 (0.99-1.01) | 1.00 (0.99-1.01) | 1.00 (1.00-1.01) | 1.00 (1.00-1.01) |
| <i>P</i> -value for trend <sup>i</sup> | .84              | .74              | .66              | .44              | .31              | .59              |

MV: multivariable; HR: hazard ratio; CI: confidence interval; BMI: body mass index

\* Not including basal cell carcinoma and cutaneous squamous cell carcinoma.

<sup>a</sup> Cumulative dose is the product of average frequency of use (times per year) multiplied by duration of use (years).

<sup>b</sup> Including participants whose natural hair color was black, dark brown, red, blond, or light brown, or who had missing information on natural hair color.

<sup>c</sup> Dark natural hair color: black and dark brown.

<sup>d</sup> Light natural hair color: red, blond, and light brown.

<sup>e</sup> Participants were excluded from stratified analyses if they had missing information on natural hair color. The number of cases among “dark hair color” and “light hair color” women does not sum to the total number of cases in “any hair color” women due to the inclusion of women with missing hair color information in the “any hair color” group.

<sup>f</sup> Models were adjusted for age and follow-up cycle.

<sup>g</sup> Models were additionally adjusted for race, natural hair color, cumulative average BMI, BMI at age 18, smoking status, pack-years of smoking, and alcohol intake. In analyses stratified by natural hair color, models were not further adjusted for natural hair color.

<sup>h</sup> *P*-value for trend was calculated using the mid-point of each category of cumulative dose in times.

<sup>i</sup> *P*-value for trend was calculated using cumulative dose in times as continuous.

**Supplementary Table 40.** Age-adjusted and multivariable (MV)-adjusted hazard ratios (HR) and 95% confidence intervals (CI) of **basal cell carcinoma incidence** among women in the NHS according to status of personal use of permanent hair dyes and natural hair color, obtained from Cox models with updated covariate values (restricting follow-up to the first 10 and 20 years after exposure assessments stopped)

| Basal cell carcinoma | Any hair color <sup>a</sup> |                                          |                                         | Dark hair color <sup>b,d</sup> |                                          |                                         | Light hair color <sup>c,d</sup> |                                          |                                         |
|----------------------|-----------------------------|------------------------------------------|-----------------------------------------|--------------------------------|------------------------------------------|-----------------------------------------|---------------------------------|------------------------------------------|-----------------------------------------|
|                      | No. of cases                | Age-adjusted <sup>e</sup><br>HR (95% CI) | MV-adjusted <sup>f</sup><br>HR (95% CI) | No. of cases                   | Age-adjusted <sup>e</sup><br>HR (95% CI) | MV-adjusted <sup>f</sup><br>HR (95% CI) | No. of cases                    | Age-adjusted <sup>e</sup><br>HR (95% CI) | MV-adjusted <sup>f</sup><br>HR (95% CI) |
| <b>1976-1992</b>     |                             |                                          |                                         |                                |                                          |                                         |                                 |                                          |                                         |
| Non-user             | 4387                        | 1 [Reference]                            | 1 [Reference]                           | 1503                           | 1 [Reference]                            | 1 [Reference]                           | 2143                            | 1 [Reference]                            | 1 [Reference]                           |
| Ever-user            | 3547                        | 1.17 (1.12-1.22)                         | 1.04 (0.99-1.09)                        | 1092                           | 1.12 (1.03-1.21)                         | 1.00 (0.92-1.09)                        | 1957                            | 1.13 (1.06-1.20)                         | 1.05 (0.98-1.12)                        |
| <b>1976-2002</b>     |                             |                                          |                                         |                                |                                          |                                         |                                 |                                          |                                         |
| Non-user             | 8407                        | 1 [Reference]                            | 1 [Reference]                           | 2900                           | 1 [Reference]                            | 1 [Reference]                           | 4022                            | 1 [Reference]                            | 1 [Reference]                           |
| Ever-user            | 6917                        | 1.18 (1.14-1.21)                         | 1.07 (1.03-1.10)                        | 2142                           | 1.14 (1.07-1.20)                         | 1.03 (0.97-1.09)                        | 3766                            | 1.13 (1.08-1.18)                         | 1.07 (1.02-1.12)                        |
| <b>1976-2012</b>     |                             |                                          |                                         |                                |                                          |                                         |                                 |                                          |                                         |
| Non-user             | 12536                       | 1 [Reference]                            | 1 [Reference]                           | 4538                           | 1 [Reference]                            | 1 [Reference]                           | 5891                            | 1 [Reference]                            | 1 [Reference]                           |
| Ever-user            | 10024                       | 1.15 (1.12-1.18)                         | 1.05 (1.02-1.08)                        | 3199                           | 1.10 (1.05-1.15)                         | 1.01 (0.96-1.06)                        | 5443                            | 1.11 (1.07-1.15)                         | 1.06 (1.02-1.11)                        |

MV: multivariable; HR: hazard ratio; CI: confidence interval; BMI: body mass index

<sup>a</sup> Including participants whose natural hair color was black, dark brown, red, blond, or light brown, or who had missing information on natural hair color.

<sup>b</sup> Dark natural hair color: black and dark brown.

<sup>c</sup> Light natural hair color: red, blond, and light brown.

<sup>d</sup> Participants were excluded from stratified analyses if they had missing information on natural hair color. The number of cases among “dark hair color” and “light hair color” women does not sum to the total number of cases in “any hair color” women due to the inclusion of women with missing hair color information in the “any hair color” group.

<sup>e</sup> Models were adjusted for age and follow-up cycle.

<sup>f</sup> Models were additionally adjusted for race, natural hair color, cumulative average BMI, BMI at age 18, smoking status, pack-years of smoking, alcohol intake, childhood reaction to sun, lifetime blistering sunburns, number of moles on arms, and cumulative UV flux since baseline. In analyses stratified by natural hair color, models were not further adjusted for natural hair color.

**Supplementary Table 41.** Age-adjusted and multivariable (MV)-adjusted hazard ratios (HR) and 95% confidence intervals (CI) of **basal cell carcinoma incidence** among women in the NHS according to cumulative dose of permanent hair dye use <sup>a</sup> and natural hair color, obtained from Cox models with updated covariate values (restricting follow-up to the first 10 and 20 years after exposure assessments stopped)

| Basal cell carcinoma                   | Any hair color <sup>b</sup> |                           |                          | Dark hair color <sup>c,e</sup> |                           |                          | Light hair color <sup>d,e</sup> |                           |                          |
|----------------------------------------|-----------------------------|---------------------------|--------------------------|--------------------------------|---------------------------|--------------------------|---------------------------------|---------------------------|--------------------------|
|                                        | No. of cases                | Age-adjusted <sup>f</sup> | MV-adjusted <sup>g</sup> | No. of cases                   | Age-adjusted <sup>f</sup> | MV-adjusted <sup>g</sup> | No. of cases                    | Age-adjusted <sup>f</sup> | MV-adjusted <sup>g</sup> |
|                                        |                             | HR (95% CI)               | HR (95% CI)              |                                | HR (95% CI)               | HR (95% CI)              |                                 | HR (95% CI)               | HR (95% CI)              |
| <b>1976-1992</b>                       |                             |                           |                          |                                |                           |                          |                                 |                           |                          |
| Non-user                               | 4387                        | 1 [Reference]             | 1 [Reference]            | 1503                           | 1 [Reference]             | 1 [Reference]            | 2143                            | 1 [Reference]             | 1 [Reference]            |
| 1-99 times                             | 1609                        | 1.14 (1.08-1.21)          | 1.04 (0.98-1.10)         | 495                            | 1.07 (0.97-1.19)          | 0.99 (0.89-1.10)         | 899                             | 1.12 (1.03-1.21)          | 1.07 (0.98-1.16)         |
| 100-199 times                          | 928                         | 1.18 (1.10-1.27)          | 1.03 (0.95-1.11)         | 309                            | 1.12 (0.99-1.27)          | 1.00 (0.88-1.14)         | 503                             | 1.11 (1.01-1.23)          | 1.03 (0.93-1.13)         |
| ≥200 times                             | 1010                        | 1.20 (1.12-1.29)          | 1.06 (0.98-1.14)         | 288                            | 1.20 (1.06-1.37)          | 1.03 (0.91-1.18)         | 555                             | 1.16 (1.06-1.28)          | 1.05 (0.95-1.16)         |
| <i>P</i> -value for trend <sup>h</sup> |                             | <.001                     | .14                      |                                | .002                      | .64                      |                                 | .001                      | .38                      |
| Per 50-time increment                  |                             | 1.01 (1.01-1.02)          | 1.00 (1.00-1.01)         |                                | 1.02 (1.01-1.02)          | 1.01 (1.00-1.02)         |                                 | 1.01 (1.00-1.02)          | 1.00 (0.99-1.01)         |
| <i>P</i> -value for trend <sup>i</sup> |                             | <0.001                    | .35                      |                                | <0.001                    | .16                      |                                 | .03                       | .91                      |
| <b>1976-2002</b>                       |                             |                           |                          |                                |                           |                          |                                 |                           |                          |
| Non-user                               | 8407                        | 1 [Reference]             | 1 [Reference]            | 2900                           | 1 [Reference]             | 1 [Reference]            | 4022                            | 1 [Reference]             | 1 [Reference]            |
| 1-99 times                             | 3247                        | 1.17 (1.12-1.21)          | 1.07 (1.03-1.12)         | 971                            | 1.07 (0.99-1.15)          | 1.00 (0.92-1.07)         | 1814                            | 1.15 (1.09-1.22)          | 1.11 (1.05-1.18)         |
| 100-199 times                          | 1807                        | 1.19 (1.13-1.25)          | 1.06 (1.01-1.12)         | 611                            | 1.16 (1.07-1.27)          | 1.05 (0.96-1.15)         | 958                             | 1.10 (1.03-1.19)          | 1.04 (0.97-1.12)         |
| ≥200 times                             | 1863                        | 1.18 (1.12-1.24)          | 1.06 (1.00-1.12)         | 560                            | 1.25 (1.14-1.37)          | 1.08 (0.98-1.19)         | 994                             | 1.11 (1.04-1.20)          | 1.04 (0.97-1.12)         |
| <i>P</i> -value for trend <sup>h</sup> |                             | <.001                     | .02                      |                                | <.001                     | .08                      |                                 | .001                      | .31                      |
| Per 50-time increment                  |                             | 1.01 (1.01-1.01)          | 1.00 (1.00-1.01)         |                                | 1.02 (1.01-1.02)          | 1.01 (1.00-1.02)         |                                 | 1.01 (1.00-1.01)          | 1.00 (0.99-1.01)         |
| <i>P</i> -value for trend <sup>i</sup> |                             | <0.001                    | .24                      |                                | <0.001                    | .05                      |                                 | .08                       | .98                      |
| <b>1976-2012</b>                       |                             |                           |                          |                                |                           |                          |                                 |                           |                          |
| Non-user                               | 12536                       | 1 [Reference]             | 1 [Reference]            | 4538                           | 1 [Reference]             | 1 [Reference]            | 5891                            | 1 [Reference]             | 1 [Reference]            |
| 1-99 times                             | 4808                        | 1.14 (1.10-1.18)          | 1.05 (1.02-1.09)         | 1526                           | 1.05 (0.99-1.11)          | 0.98 (0.93-1.05)         | 2645                            | 1.13 (1.08-1.18)          | 1.09 (1.04-1.15)         |
| 100-199 times                          | 2605                        | 1.16 (1.11-1.21)          | 1.04 (1.00-1.09)         | 895                            | 1.12 (1.04-1.20)          | 1.03 (0.96-1.11)         | 1387                            | 1.09 (1.03-1.16)          | 1.03 (0.97-1.10)         |
| ≥200 times                             | 2611                        | 1.15 (1.10-1.20)          | 1.05 (1.00-1.09)         | 778                            | 1.17 (1.09-1.27)          | 1.04 (0.96-1.13)         | 1411                            | 1.11 (1.04-1.17)          | 1.04 (0.98-1.11)         |

|                                        |                  |                  |                  |                  |                  |                  |
|----------------------------------------|------------------|------------------|------------------|------------------|------------------|------------------|
| <i>P</i> -value for trend <sup>h</sup> | <.001            | .03              | <.001            | .25              | <.001            | .23              |
| Per 50-time increment                  | 1.01 (1.01-1.01) | 1.00 (1.00-1.01) | 1.01 (1.01-1.02) | 1.00 (1.00-1.01) | 1.01 (1.00-1.01) | 1.00 (0.99-1.01) |
| <i>P</i> -value for trend <sup>i</sup> | <0.001           | .40              | <0.001           | .29              | .07              | .96              |

MV: multivariable; HR: hazard ratio; CI: confidence interval; BMI: body mass index

<sup>a</sup> Cumulative dose is the product of average frequency of use (times per year) multiplied by duration of use (years).

<sup>b</sup> Including participants whose natural hair color was black, dark brown, red, blond, or light brown, or who had missing information on natural hair color.

<sup>c</sup> Dark natural hair color: black and dark brown.

<sup>d</sup> Light natural hair color: red, blond, and light brown.

<sup>e</sup> Participants were excluded from stratified analyses if they had missing information on natural hair color. The number of cases among “dark hair color” and “light hair color” women does not sum to the total number of cases in “any hair color” women due to the inclusion of women with missing hair color information in the “any hair color” group.

<sup>f</sup> Models were adjusted for age and follow-up cycle.

<sup>g</sup> Models were additionally adjusted for race, natural hair color, cumulative average BMI, BMI at age 18, smoking status, pack-years of smoking, alcohol intake, childhood reaction to sun, lifetime blistering sunburns, number of moles on arms, and cumulative UV flux since baseline. In analyses stratified by natural hair color, models were not further adjusted for natural hair color.

<sup>h</sup> *P*-value for trend was calculated using the mid-point of each category of cumulative dose in times.

<sup>i</sup> *P*-value for trend was calculated using cumulative dose in times as continuous.

**Supplementary Table 42.** Age-adjusted and multivariable (MV)-adjusted hazard ratios (HR) and 95% confidence intervals (CI) of **breast cancer incidence** among women in the NHS according to status of personal use of permanent hair dyes and natural hair color, obtained from Cox models with updated covariate values (restricting follow-up to the first 10 and 20 years after exposure assessments stopped)

| Breast cancer    | Any hair color <sup>a</sup> |                                          |                                         | Dark hair color <sup>b,d</sup> |                                          |                                         | Light hair color <sup>c,d</sup> |                                          |                                         |
|------------------|-----------------------------|------------------------------------------|-----------------------------------------|--------------------------------|------------------------------------------|-----------------------------------------|---------------------------------|------------------------------------------|-----------------------------------------|
|                  | No. of cases                | Age-adjusted <sup>e</sup><br>HR (95% CI) | MV-adjusted <sup>f</sup><br>HR (95% CI) | No. of cases                   | Age-adjusted <sup>e</sup><br>HR (95% CI) | MV-adjusted <sup>f</sup><br>HR (95% CI) | No. of cases                    | Age-adjusted <sup>e</sup><br>HR (95% CI) | MV-adjusted <sup>f</sup><br>HR (95% CI) |
| <b>1976-1992</b> |                             |                                          |                                         |                                |                                          |                                         |                                 |                                          |                                         |
| Non-user         | 2189                        | 1 [Reference]                            | 1 [Reference]                           | 828                            | 1 [Reference]                            | 1 [Reference]                           | 861                             | 1 [Reference]                            | 1 [Reference]                           |
| Ever-user        | 1657                        | 1.10 (1.03-1.18)                         | 1.05 (0.99-1.12)                        | 588                            | 1.11 (1.00-1.24)                         | 1.07 (0.96-1.19)                        | 755                             | 1.07 (0.97-1.18)                         | 1.03 (0.94-1.14)                        |
| <b>1976-2002</b> |                             |                                          |                                         |                                |                                          |                                         |                                 |                                          |                                         |
| Non-user         | 4043                        | 1 [Reference]                            | 1 [Reference]                           | 1555                           | 1 [Reference]                            | 1 [Reference]                           | 1607                            | 1 [Reference]                            | 1 [Reference]                           |
| Ever-user        | 3030                        | 1.08 (1.03-1.13)                         | 1.04 (0.99-1.09)                        | 1092                           | 1.10 (1.01-1.19)                         | 1.07 (0.99-1.16)                        | 1420                            | 1.06 (0.99-1.14)                         | 1.03 (0.96-1.11)                        |
| <b>1976-2012</b> |                             |                                          |                                         |                                |                                          |                                         |                                 |                                          |                                         |
| Non-user         | 5332                        | 1 [Reference]                            | 1 [Reference]                           | 2117                           | 1 [Reference]                            | 1 [Reference]                           | 2084                            | 1 [Reference]                            | 1 [Reference]                           |
| Ever-user        | 3920                        | 1.06 (1.01-1.10)                         | 1.02 (0.98-1.06)                        | 1448                           | 1.08 (1.01-1.15)                         | 1.05 (0.98-1.12)                        | 1818                            | 1.04 (0.98-1.11)                         | 1.02 (0.95-1.09)                        |

MV: multivariable; HR: hazard ratio; CI: confidence interval; BMI: body mass index

<sup>a</sup> Including participants whose natural hair color was black, dark brown, red, blond, or light brown, or who had missing information on natural hair color.

<sup>b</sup> Dark natural hair color: black and dark brown.

<sup>c</sup> Light natural hair color: red, blond, and light brown.

<sup>d</sup> Participants were excluded from stratified analyses if they had missing information on natural hair color. The number of cases among “dark hair color” and “light hair color” women does not sum to the total number of cases in “any hair color” women due to the inclusion of women with missing hair color information in the “any hair color” group.

<sup>e</sup> Models were adjusted for age and follow-up cycle.

<sup>f</sup> Models were additionally adjusted for race, natural hair color, cumulative average BMI, BMI at age 18, smoking status, pack-years of smoking, alcohol intake, menopausal status, postmenopausal hormone use, oral contraceptive use, adolescent body size, age at menarche, age at first birth, parity, breastfeeding, first-degree family history of breast cancer, history of benign breast disease, and current mammography use. In analyses stratified by natural hair color, models were not further adjusted for natural hair color.

**Supplementary Table 43.** Age-adjusted and multivariable (MV)-adjusted hazard ratios (HR) and 95% confidence intervals (CI) of **breast cancer incidence** among women in the NHS according to cumulative dose of permanent hair dye use <sup>a</sup> and natural hair color, obtained from Cox models with updated covariate values (restricting follow-up to the first 10 and 20 years after exposure assessments stopped)

| Breast cancer                          | Any hair color <sup>b</sup> |                           |                          | Dark hair color <sup>c,e</sup> |                           |                          | Light hair color <sup>d,e</sup> |                           |                          |
|----------------------------------------|-----------------------------|---------------------------|--------------------------|--------------------------------|---------------------------|--------------------------|---------------------------------|---------------------------|--------------------------|
|                                        | No. of cases                | Age-adjusted <sup>f</sup> | MV-adjusted <sup>g</sup> | No. of cases                   | Age-adjusted <sup>f</sup> | MV-adjusted <sup>g</sup> | No. of cases                    | Age-adjusted <sup>f</sup> | MV-adjusted <sup>g</sup> |
|                                        |                             | HR (95% CI)               | HR (95% CI)              |                                | HR (95% CI)               | HR (95% CI)              |                                 | HR (95% CI)               | HR (95% CI)              |
| <b>1976-1992</b>                       |                             |                           |                          |                                |                           |                          |                                 |                           |                          |
| Non-user                               | 2189                        | 1 [Reference]             | 1 [Reference]            | 828                            | 1 [Reference]             | 1 [Reference]            | 861                             | 1 [Reference]             | 1 [Reference]            |
| 1-99 times                             | 763                         | 1.08 (1.00-1.17)          | 1.04 (0.95-1.13)         | 297                            | 1.16 (1.02-1.33)          | 1.13 (0.98-1.29)         | 321                             | 0.97 (0.85-1.11)          | 0.94 (0.82-1.07)         |
| 100-199 times                          | 404                         | 1.04 (0.93-1.16)          | 0.99 (0.89-1.10)         | 146                            | 0.98 (0.82-1.17)          | 0.94 (0.78-1.12)         | 184                             | 1.00 (0.85-1.18)          | 0.97 (0.83-1.14)         |
| ≥200 times                             | 490                         | 1.20 (1.08-1.32)          | 1.14 (1.03-1.26)         | 145                            | 1.18 (0.99-1.42)          | 1.11 (0.93-1.33)         | 250                             | 1.30 (1.13-1.50)          | 1.26 (1.09-1.45)         |
| <i>P</i> -value for trend <sup>h</sup> |                             | <.001                     | .03                      |                                | .14                       | .49                      |                                 | .001                      | .004                     |
| Per 50-time increment                  |                             | 1.01 (1.00-1.02)          | 1.01 (1.00-1.02)         |                                | 1.01 (1.00-1.03)          | 1.01 (0.99-1.02)         |                                 | 1.02 (1.01-1.03)          | 1.02 (1.00-1.03)         |
| <i>P</i> -value for trend <sup>i</sup> |                             | .02                       | .10                      |                                | .12                       | .35                      |                                 | .003                      | .01                      |
| <b>1976-2002</b>                       |                             |                           |                          |                                |                           |                          |                                 |                           |                          |
| Non-user                               | 4043                        | 1 [Reference]             | 1 [Reference]            | 1555                           | 1 [Reference]             | 1 [Reference]            | 1607                            | 1 [Reference]             | 1 [Reference]            |
| 1-99 times                             | 1433                        | 1.06 (1.00-1.13)          | 1.02 (0.96-1.09)         | 554                            | 1.12 (1.02-1.24)          | 1.11 (1.01-1.23)         | 638                             | 0.99 (0.91-1.09)          | 0.97 (0.88-1.06)         |
| 100-199 times                          | 762                         | 1.06 (0.98-1.15)          | 1.01 (0.93-1.10)         | 290                            | 1.05 (0.92-1.19)          | 1.02 (0.89-1.16)         | 354                             | 1.03 (0.92-1.16)          | 1.02 (0.90-1.14)         |
| ≥200 times                             | 835                         | 1.14 (1.05-1.22)          | 1.09 (1.01-1.17)         | 248                            | 1.10 (0.96-1.26)          | 1.04 (0.90-1.19)         | 428                             | 1.21 (1.09-1.35)          | 1.18 (1.05-1.31)         |
| <i>P</i> -value for trend <sup>h</sup> |                             | <.001                     | .047                     |                                | .16                       | .62                      |                                 | .001                      | .005                     |
| Per 50-time increment                  |                             | 1.01 (1.00-1.01)          | 1.01 (1.00-1.01)         |                                | 1.01 (1.00-1.02)          | 1.01 (0.99-1.02)         |                                 | 1.01 (1.00-1.02)          | 1.01 (1.00-1.02)         |
| <i>P</i> -value for trend <sup>i</sup> |                             | .02                       | .09                      |                                | .15                       | .41                      |                                 | .004                      | .01                      |
| <b>1976-2012</b>                       |                             |                           |                          |                                |                           |                          |                                 |                           |                          |
| Non-user                               | 5332                        | 1 [Reference]             | 1 [Reference]            | 2117                           | 1 [Reference]             | 1 [Reference]            | 2084                            | 1 [Reference]             | 1 [Reference]            |
| 1-99 times                             | 1884                        | 1.04 (0.98-1.09)          | 1.00 (0.95-1.06)         | 741                            | 1.09 (1.00-1.18)          | 1.07 (0.98-1.17)         | 833                             | 0.99 (0.91-1.07)          | 0.96 (0.88-1.05)         |
| 100-199 times                          | 972                         | 1.03 (0.96-1.10)          | 0.99 (0.92-1.06)         | 384                            | 1.04 (0.93-1.16)          | 1.01 (0.90-1.13)         | 447                             | 1.00 (0.90-1.11)          | 0.98 (0.89-1.09)         |
| ≥200 times                             | 1064                        | 1.12 (1.04-1.19)          | 1.08 (1.01-1.16)         | 323                            | 1.09 (0.97-1.23)          | 1.04 (0.92-1.17)         | 538                             | 1.19 (1.08-1.31)          | 1.16 (1.05-1.28)         |

|                                        |                  |                  |                  |                  |                  |                  |
|----------------------------------------|------------------|------------------|------------------|------------------|------------------|------------------|
| <i>P</i> -value for trend <sup>h</sup> | .001             | .06              | .14              | .57              | .001             | .007             |
| Per 50-time increment                  | 1.01 (1.00-1.01) | 1.00 (1.00-1.01) | 1.01 (1.00-1.02) | 1.01 (0.99-1.02) | 1.01 (1.00-1.02) | 1.01 (1.00-1.02) |
| <i>P</i> -value for trend <sup>i</sup> | .05              | .17              | .14              | .39              | .006             | .02              |

MV: multivariable; HR: hazard ratio; CI: confidence interval; BMI: body mass index

<sup>a</sup> Cumulative dose is the product of average frequency of use (times per year) multiplied by duration of use (years).

<sup>b</sup> Including participants whose natural hair color was black, dark brown, red, blond, or light brown, or who had missing information on natural hair color.

<sup>c</sup> Dark natural hair color: black and dark brown.

<sup>d</sup> Light natural hair color: red, blond, and light brown.

<sup>e</sup> Participants were excluded from stratified analyses if they had missing information on natural hair color. The number of cases among “dark hair color” and “light hair color” women does not sum to the total number of cases in “any hair color” women due to the inclusion of women with missing hair color information in the “any hair color” group.

<sup>f</sup> Models were adjusted for age and follow-up cycle.

<sup>g</sup> Models were additionally adjusted for race, natural hair color, cumulative average BMI, BMI at age 18, smoking status, pack-years of smoking, alcohol intake, menopausal status, postmenopausal hormone use, oral contraceptive use, adolescent body size, age at menarche, age at first birth, parity, breastfeeding, first-degree family history of breast cancer, history of benign breast disease, and current mammography use. In analyses stratified by natural hair color, models were not further adjusted for natural hair color.

<sup>h</sup> *P*-value for trend was calculated using the mid-point of each category of cumulative dose in times.

<sup>i</sup> *P*-value for trend was calculated using cumulative dose in times as continuous.

**Supplementary Table 44.** Age-adjusted and multivariable (MV)-adjusted hazard ratios (HR) and 95% confidence intervals (CI) of **ovarian cancer incidence** among women in the NHS according to status of personal use of permanent hair dyes and natural hair color, obtained from Cox models with updated covariate values (restricting follow-up to the first 10 and 20 years after exposure assessments stopped)

| Ovarian cancer   | Any hair color <sup>a</sup> |                                          |                                         | Dark hair color <sup>b,d</sup> |                                          |                                         | Light hair color <sup>c,d</sup> |                                          |                                         |
|------------------|-----------------------------|------------------------------------------|-----------------------------------------|--------------------------------|------------------------------------------|-----------------------------------------|---------------------------------|------------------------------------------|-----------------------------------------|
|                  | No. of cases                | Age-adjusted <sup>e</sup><br>HR (95% CI) | MV-adjusted <sup>f</sup><br>HR (95% CI) | No. of cases                   | Age-adjusted <sup>e</sup><br>HR (95% CI) | MV-adjusted <sup>f</sup><br>HR (95% CI) | No. of cases                    | Age-adjusted <sup>e</sup><br>HR (95% CI) | MV-adjusted <sup>f</sup><br>HR (95% CI) |
| <b>1976-1992</b> |                             |                                          |                                         |                                |                                          |                                         |                                 |                                          |                                         |
| Non-user         | 303                         | 1 [Reference]                            | 1 [Reference]                           | 97                             | 1 [Reference]                            | 1 [Reference]                           | 116                             | 1 [Reference]                            | 1 [Reference]                           |
| Ever-user        | 219                         | 1.05 (0.88-1.25)                         | 1.05 (0.88-1.25)                        | 79                             | 1.28 (0.95-1.73)                         | 1.35 (0.99-1.83)                        | 88                              | 0.92 (0.70-1.22)                         | 0.89 (0.67-1.18)                        |
| <b>1976-2002</b> |                             |                                          |                                         |                                |                                          |                                         |                                 |                                          |                                         |
| Non-user         | 510                         | 1 [Reference]                            | 1 [Reference]                           | 176                            | 1 [Reference]                            | 1 [Reference]                           | 198                             | 1 [Reference]                            | 1 [Reference]                           |
| Ever-user        | 383                         | 1.08 (0.94-1.23)                         | 1.07 (0.94-1.23)                        | 140                            | 1.22 (0.98-1.53)                         | 1.27 (1.01-1.60)                        | 168                             | 1.02 (0.83-1.26)                         | 1.01 (0.81-1.24)                        |
| <b>1976-2012</b> |                             |                                          |                                         |                                |                                          |                                         |                                 |                                          |                                         |
| Non-user         | 687                         | 1 [Reference]                            | 1 [Reference]                           | 256                            | 1 [Reference]                            | 1 [Reference]                           | 267                             | 1 [Reference]                            | 1 [Reference]                           |
| Ever-user        | 528                         | 1.09 (0.98-1.23)                         | 1.09 (0.97-1.22)                        | 193                            | 1.17 (0.97-1.41)                         | 1.21 (1.00-1.47)                        | 242                             | 1.08 (0.90-1.28)                         | 1.06 (0.89-1.27)                        |

MV: multivariable; HR: hazard ratio; CI: confidence interval; BMI: body mass index

<sup>a</sup> Including participants whose natural hair color was black, dark brown, red, blond, or light brown, or who had missing information on natural hair color.

<sup>b</sup> Dark natural hair color: black and dark brown.

<sup>c</sup> Light natural hair color: red, blond, and light brown.

<sup>d</sup> Participants were excluded from stratified analyses if they had missing information on natural hair color. The number of cases among “dark hair color” and “light hair color” women does not sum to the total number of cases in “any hair color” women due to the inclusion of women with missing hair color information in the “any hair color” group.

<sup>e</sup> Models were adjusted for age and follow-up cycle.

<sup>f</sup> Models were additionally adjusted for race, natural hair color, cumulative average BMI, BMI at age 18, smoking status, pack-years of smoking, alcohol intake, menopausal status, postmenopausal hormone use, age at menarche, oral contraceptive use, and parity. In analyses stratified by natural hair color, models were not further adjusted for natural hair color.

**Supplementary Table 45.** Age-adjusted and multivariable (MV)-adjusted hazard ratios (HR) and 95% confidence intervals (CI) of **ovarian cancer incidence** among women in the NHS according to cumulative dose of permanent hair dye use <sup>a</sup> and natural hair color, obtained from Cox models with updated covariate values (restricting follow-up to the first 10 and 20 years after exposure assessments stopped)

| Ovarian cancer                         | Any hair color <sup>b</sup> |                           |                          | Dark hair color <sup>c,e</sup> |                           |                          | Light hair color <sup>d,e</sup> |                           |                          |
|----------------------------------------|-----------------------------|---------------------------|--------------------------|--------------------------------|---------------------------|--------------------------|---------------------------------|---------------------------|--------------------------|
|                                        | No. of cases                | Age-adjusted <sup>f</sup> | MV-adjusted <sup>g</sup> | No. of cases                   | Age-adjusted <sup>f</sup> | MV-adjusted <sup>g</sup> | No. of cases                    | Age-adjusted <sup>f</sup> | MV-adjusted <sup>g</sup> |
|                                        |                             | HR (95% CI)               | HR (95% CI)              |                                | HR (95% CI)               | HR (95% CI)              |                                 | HR (95% CI)               | HR (95% CI)              |
| <b>1976-1992</b>                       |                             |                           |                          |                                |                           |                          |                                 |                           |                          |
| Non-user                               | 303                         | 1 [Reference]             | 1 [Reference]            | 97                             | 1 [Reference]             | 1 [Reference]            | 116                             | 1 [Reference]             | 1 [Reference]            |
| 1-99 times                             | 92                          | 0.94 (0.74-1.19)          | 0.95 (0.75-1.21)         | 32                             | 1.04 (0.70-1.56)          | 1.06 (0.70-1.61)         | 35                              | 0.79 (0.54-1.16)          | 0.77 (0.52-1.13)         |
| 100-199 times                          | 60                          | 1.12 (0.85-1.48)          | 1.13 (0.85-1.50)         | 23                             | 1.36 (0.86-2.15)          | 1.48 (0.93-2.36)         | 28                              | 1.12 (0.74-1.70)          | 1.07 (0.70-1.64)         |
| ≥200 times                             | 67                          | 1.17 (0.90-1.53)          | 1.12 (0.86-1.47)         | 24                             | 1.73 (1.09-2.74)          | 1.85 (1.16-2.95)         | 25                              | 0.96 (0.62-1.48)          | 0.92 (0.59-1.44)         |
| <i>P</i> -value for trend <sup>h</sup> |                             | .18                       | .29                      |                                | .01                       | .005                     |                                 | .92                       | .92                      |
| Per 50-time increment                  |                             | 1.01 (0.99-1.03)          | 1.01 (0.99-1.03)         |                                | 1.06 (1.02-1.11)          | 1.07 (1.03-1.12)         |                                 | 0.99 (0.95-1.04)          | 0.99 (0.94-1.04)         |
| <i>P</i> -value for trend <sup>i</sup> |                             | .26                       | .43                      |                                | .005                      | .002                     |                                 | .81                       | .69                      |
| <b>1976-2002</b>                       |                             |                           |                          |                                |                           |                          |                                 |                           |                          |
| Non-user                               | 510                         | 1 [Reference]             | 1 [Reference]            | 176                            | 1 [Reference]             | 1 [Reference]            | 198                             | 1 [Reference]             | 1 [Reference]            |
| 1-99 times                             | 163                         | 0.96 (0.81-1.15)          | 0.97 (0.81-1.16)         | 61                             | 1.07 (0.80-1.44)          | 1.10 (0.82-1.48)         | 64                              | 0.83 (0.63-1.10)          | 0.83 (0.62-1.11)         |
| 100-199 times                          | 115                         | 1.26 (1.03-1.55)          | 1.27 (1.03-1.56)         | 44                             | 1.41 (1.01-1.97)          | 1.48 (1.06-2.08)         | 56                              | 1.29 (0.95-1.74)          | 1.25 (0.92-1.70)         |
| ≥200 times                             | 105                         | 1.09 (0.89-1.35)          | 1.08 (0.87-1.33)         | 35                             | 1.33 (0.92-1.92)          | 1.40 (0.96-2.03)         | 48                              | 1.09 (0.79-1.50)          | 1.06 (0.77-1.47)         |
| <i>P</i> -value for trend <sup>h</sup> |                             | .13                       | .17                      |                                | .04                       | .02                      |                                 | .25                       | .35                      |
| Per 50-time increment                  |                             | 1.01 (0.99-1.03)          | 1.00 (0.99-1.02)         |                                | 1.03 (1.00-1.07)          | 1.04 (1.00-1.07)         |                                 | 1.01 (0.98-1.04)          | 1.00 (0.97-1.04)         |
| <i>P</i> -value for trend <sup>i</sup> |                             | .54                       | .64                      |                                | .08                       | .048                     |                                 | .70                       | .80                      |
| <b>1976-2012</b>                       |                             |                           |                          |                                |                           |                          |                                 |                           |                          |
| Non-user                               | 687                         | 1 [Reference]             | 1 [Reference]            | 256                            | 1 [Reference]             | 1 [Reference]            | 267                             | 1 [Reference]             | 1 [Reference]            |
| 1-99 times                             | 231                         | 0.99 (0.86-1.15)          | 1.00 (0.86-1.16)         | 89                             | 1.06 (0.83-1.36)          | 1.10 (0.86-1.41)         | 95                              | 0.89 (0.70-1.12)          | 0.89 (0.70-1.13)         |
| 100-199 times                          | 149                         | 1.21 (1.01-1.44)          | 1.20 (1.01-1.44)         | 58                             | 1.31 (0.98-1.75)          | 1.36 (1.02-1.82)         | 72                              | 1.23 (0.94-1.60)          | 1.21 (0.93-1.57)         |
| ≥200 times                             | 148                         | 1.17 (0.97-1.39)          | 1.15 (0.96-1.37)         | 46                             | 1.24 (0.90-1.71)          | 1.28 (0.93-1.77)         | 75                              | 1.27 (0.98-1.65)          | 1.24 (0.95-1.61)         |

|                                        |                  |                  |                  |                  |                  |                  |
|----------------------------------------|------------------|------------------|------------------|------------------|------------------|------------------|
| <i>P</i> -value for trend <sup>h</sup> | .03              | .046             | .07              | .04              | .03              | .047             |
| Per 50-time<br>increment               | 1.01 (0.99-1.02) | 1.01 (0.99-1.02) | 1.03 (0.99-1.06) | 1.03 (1.00-1.06) | 1.02 (1.00-1.04) | 1.02 (0.99-1.04) |
| <i>P</i> -value for trend <sup>i</sup> | .24              | .33              | .13              | .09              | .11              | .16              |

MV: multivariable; HR: hazard ratio; CI: confidence interval; BMI: body mass index

<sup>a</sup> Cumulative dose is the product of average frequency of use (times per year) multiplied by duration of use (years).

<sup>b</sup> Including participants whose natural hair color was black, dark brown, red, blond, or light brown, or who had missing information on natural hair color.

<sup>c</sup> Dark natural hair color: black and dark brown.

<sup>d</sup> Light natural hair color: red, blond, and light brown.

<sup>e</sup> Participants were excluded from stratified analyses if they had missing information on natural hair color. The number of cases among “dark hair color” and “light hair color” women does not sum to the total number of cases in “any hair color” women due to the inclusion of women with missing hair color information in the “any hair color” group.

<sup>f</sup> Models were adjusted for age and follow-up cycle.

<sup>g</sup> Models were additionally adjusted for race, natural hair color, cumulative average BMI, BMI at age 18, smoking status, pack-years of smoking, alcohol intake, menopausal status, postmenopausal hormone use, age at menarche, oral contraceptive use, and parity. In analyses stratified by natural hair color, models were not further adjusted for natural hair color.

<sup>h</sup> *P*-value for trend was calculated using the mid-point of each category of cumulative dose in times.

<sup>i</sup> *P*-value for trend was calculated using cumulative dose in times as continuous.

**Supplementary Table 46.** Multivariable (MV)-adjusted hazard ratios (HR) and 95% confidence intervals (CI) of **overall \* and specific cancer incidence and cancer-related death** among women in the NHS with any hair color according to status of personal use of permanent hair dyes, obtained from Cox models with updated covariate values (using baseline exposure information only)

| Types of cancers                                 | Ever versus non-use of permanent hair dyes |                         |                                |                         |                                 |                         | <i>P</i> -value for interaction |
|--------------------------------------------------|--------------------------------------------|-------------------------|--------------------------------|-------------------------|---------------------------------|-------------------------|---------------------------------|
|                                                  | Any hair color <sup>a</sup>                |                         | Dark hair color <sup>b,d</sup> |                         | Light hair color <sup>c,d</sup> |                         |                                 |
|                                                  | No. of cases                               | MV-adjusted HR (95% CI) | No. of cases                   | MV-adjusted HR (95% CI) | No. of cases                    | MV-adjusted HR (95% CI) |                                 |
| All cancers <sup>*,e</sup>                       | 22612                                      | 0.99 (0.96-1.01)        | 8389                           | 0.99 (0.94-1.04)        | 9417                            | 1.01 (0.96-1.05)        | .75                             |
| All solid cancers <sup>*,e</sup>                 | 20805                                      | 0.98 (0.95-1.01)        | 7648                           | 0.97 (0.93-1.02)        | 8708                            | 1.01 (0.96-1.05)        | .49                             |
| Basal cell carcinoma <sup>e,f</sup>              | 22560                                      | 1.05 (1.02-1.08)        | 7737                           | 1.03 (0.98-1.08)        | 11334                           | 1.06 (1.02-1.10)        | .67                             |
| Cutaneous squamous cell carcinoma <sup>e,f</sup> | 2792                                       | 0.97 (0.89-1.06)        | 959                            | 1.02 (0.88-1.17)        | 1375                            | 0.90 (0.80-1.01)        | .12                             |
| Melanoma <sup>e,f</sup>                          | 1198                                       | 0.91 (0.79-1.04)        | 386                            | 0.90 (0.71-1.15)        | 580                             | 0.84 (0.70-1.01)        | .96                             |
| Breast cancer <sup>e,g</sup>                     | 9252                                       | 1.01 (0.96-1.05)        | 3565                           | 1.02 (0.95-1.10)        | 3902                            | 1.03 (0.96-1.10)        | .68                             |
| Breast cancer (ER+) <sup>e,g,m</sup>             | 5905                                       | 0.99 (0.93-1.05)        | 2388                           | 0.99 (0.91-1.09)        | 2595                            | 1.01 (0.93-1.09)        | .78                             |
| Breast cancer (ER-) <sup>e,g,m</sup>             | 1521                                       | 1.01 (0.90-1.12)        | 610                            | 1.07 (0.90-1.29)        | 649                             | 1.03 (0.87-1.22)        | .47                             |
| Breast cancer (PR+) <sup>e,g,m</sup>             | 4826                                       | 0.99 (0.93-1.05)        | 1933                           | 1.00 (0.90-1.11)        | 2148                            | 0.98 (0.90-1.08)        | .44                             |
| Breast cancer (PR-) <sup>e,g,m</sup>             | 2379                                       | 0.99 (0.90-1.08)        | 977                            | 1.01 (0.87-1.16)        | 1003                            | 1.06 (0.93-1.21)        | .85                             |
| Breast cancer (ER+/PR+) <sup>e,g,m</sup>         | 4634                                       | 0.99 (0.92-1.05)        | 1848                           | 0.99 (0.89-1.10)        | 2079                            | 0.98 (0.89-1.08)        | .53                             |
| Breast cancer (ER+/PR-) <sup>e,g,m</sup>         | 1086                                       | 0.97 (0.85-1.11)        | 459                            | 0.95 (0.77-1.17)        | 441                             | 1.09 (0.90-1.34)        | .36                             |
| Breast cancer (ER-/PR-) <sup>e,g,m</sup>         | 1287                                       | 1.00 (0.89-1.13)        | 517                            | 1.07 (0.88-1.30)        | 561                             | 1.05 (0.88-1.25)        | .56                             |
| Ovarian cancer <sup>e,h</sup>                    | 1215                                       | 1.09 (0.96-1.22)        | 449                            | 1.14 (0.93-1.39)        | 509                             | 1.17 (0.97-1.40)        | .74                             |
| Colorectal cancer <sup>e,i</sup>                 | 2394                                       | 1.06 (0.97-1.15)        | 858                            | 1.09 (0.94-1.26)        | 991                             | 1.09 (0.95-1.24)        | .73                             |
| Bladder cancer <sup>e,j</sup>                    | 596                                        | 1.13 (0.96-1.34)        | 227                            | 1.12 (0.85-1.48)        | 260                             | 1.19 (0.92-1.53)        | .99                             |
| Kidney cancer <sup>e</sup>                       | 477                                        | 0.99 (0.81-1.20)        | 184                            | 0.99 (0.71-1.37)        | 190                             | 1.02 (0.75-1.38)        | .64                             |
| Lung cancer <sup>e</sup>                         | 2623                                       | 0.96 (0.88-1.04)        | 908                            | 0.84 (0.72-0.97)        | 1017                            | 1.05 (0.92-1.19)        | .02                             |
| Brain cancer <sup>e</sup>                        | 277                                        | 0.76 (0.58-0.99)        | 100                            | 1.00 (0.64-1.55)        | 100                             | 0.52 (0.32-0.83)        | .05                             |
| All hematopoietic cancers <sup>e</sup>           | 1807                                       | 1.04 (0.94-1.15)        | 741                            | 1.12 (0.95-1.31)        | 709                             | 1.00 (0.86-1.17)        | .24                             |
| All non-Hodgkin lymphomas <sup>e</sup>           | 1277                                       | 0.98 (0.87-1.11)        | 529                            | 1.01 (0.84-1.23)        | 510                             | 0.97 (0.80-1.16)        | .67                             |
| T-cell lymphoma <sup>e</sup>                     | 51                                         | 1.51 (0.85-2.68)        | 25                             | 1.19 (0.50-2.84)        | 15                              | 1.99 (0.70-5.65)        | .33                             |

|                                                                      |      |                  |      |                  |      |                  |      |
|----------------------------------------------------------------------|------|------------------|------|------------------|------|------------------|------|
| Diffuse large B-cell lymphoma <sup>e</sup>                           | 190  | 1.10 (0.81-1.49) | 76   | 1.11 (0.67-1.82) | 79   | 0.87 (0.54-1.41) | .50  |
| Follicular lymphoma <sup>e</sup>                                     | 204  | 1.17 (0.87-1.56) | 83   | 1.36 (0.86-2.15) | 87   | 1.05 (0.67-1.63) | .30  |
| Chronic lymphocytic leukemia/small lymphocytic lymphoma <sup>e</sup> | 272  | 0.74 (0.57-0.98) | 122  | 0.81 (0.54-1.22) | 111  | 0.69 (0.45-1.06) | .49  |
| Hodgkin lymphoma <sup>e,k</sup>                                      | 70   | 1.25 (0.76-2.05) | 24   | 3.93 (1.70-9.11) | 31   | 0.58 (0.24-1.37) | .002 |
| Multiple myeloma <sup>e,k</sup>                                      | 274  | 1.00 (0.78-1.30) | 113  | 0.94 (0.62-1.43) | 108  | 0.97 (0.65-1.46) | .95  |
| Myeloid leukemias <sup>e</sup>                                       | 170  | 1.11 (0.81-1.53) | 59   | 1.14 (0.66-2.00) | 64   | 1.17 (0.70-1.96) | .93  |
| Cancer-related death <sup>e,l</sup>                                  | 4860 | 1.00 (0.94-1.07) | 1661 | 1.04 (0.93-1.16) | 1801 | 1.03 (0.94-1.14) | .82  |

MV: multivariable; HR: hazard ratio; CI: confidence interval; ER: estrogen receptor; PR: progesterone receptor; BMI: body mass index; UV: ultraviolet; NSAIDs: nonsteroidal anti-inflammatory drugs

\* Not including basal cell carcinoma and cutaneous squamous cell carcinoma.

<sup>a</sup> Including participants whose natural hair color was black, dark brown, red, blond, or light brown, or who had missing information on natural hair color.

<sup>b</sup> Dark natural hair color: black and dark brown.

<sup>c</sup> Light natural hair color: red, blond, and light brown.

<sup>d</sup> Participants were excluded from stratified analyses if they had missing information on natural hair color. The number of cases among “dark hair color” and “light hair color” women does not sum to the total number of cases in “any hair color” women due to the inclusion of women with missing hair color information in the “any hair color” group.

<sup>e</sup> Models were adjusted for age, follow-up cycle, race, natural hair color, cumulative average BMI, BMI at age 18, smoking status, pack-years of smoking, and alcohol intake. In analyses stratified by natural hair color, models were not further adjusted for natural hair color.

<sup>f</sup> Models were additionally adjusted for childhood reaction to sun, lifetime blistering sunburns, number of moles on arms, and cumulative UV flux since baseline.

<sup>g</sup> Models were additionally adjusted for menopausal status, postmenopausal hormone use, oral contraceptive use, adolescent body size, age at menarche, age at first birth, parity, breastfeeding, first-degree family history of breast cancer, history of benign breast disease, and current mammography use.

<sup>h</sup> Models were additionally adjusted for menopausal status, postmenopausal hormone use, age at menarche, oral contraceptive use, and parity.

<sup>i</sup> Models were additionally adjusted for physical activity, menopausal status, postmenopausal hormone use, family history of colorectal cancer, history of diabetes mellitus, screening colonoscopy or sigmoidoscopy in the previous 2 years, regular use of aspirin, regular use of non-aspirin NSAIDs, multivitamin use, total calories intake, red or processed meat intake, and intake of fiber, folate, calcium, and vitamin D.

<sup>j</sup> Models were additionally adjusted for total fluid intake.

<sup>k</sup> Models were additionally adjusted for regular use of aspirin.

<sup>l</sup> Models were additionally adjusted for physical activity, menopausal status, postmenopausal hormone use, parity, regular use of aspirin, regular use of non-aspirin NSAIDs, multivitamin use, total calories intake, history of hypertension, history of hypercholesterolemia, and history of diabetes mellitus.

<sup>m</sup> Hormone receptor status was not available for all the breast cancer cases.

**Supplementary Figure 1.** Dose-response relationship between cumulative dose of personal permanent hair dye use and overall cancer incidence

**Cumulative dose of hair dye use and overall cancer incidence**



Dashed lines represent the 95% confidence intervals (CIs) of the hazard ratio (HR). Multivariable model was adjusted for the same set of covariates as in Tables 2-5 and Supplementary Table 1.

For overall cancer incidence, no spline variable was selected and  $P = .65$  for linearity.

**Supplementary Figure 2.** Dose-response relationship between cumulative dose of personal permanent hair dye use and overall solid cancer incidence

**Cumulative dose of hair dye use and overall solid cancer incidence**



Dashed lines represent the 95% confidence intervals (CIs) of the hazard ratio (HR). Multivariable model was adjusted for the same set of covariates as in Tables 2-5 and Supplementary Table 2.

For overall solid cancer incidence, no spline variable was selected and  $P = .39$  for linearity.

**Supplementary Figure 3.** Dose-response relationship between cumulative dose of personal permanent hair dye use and basal cell carcinoma incidence

**Cumulative dose of hair dye use and basal cell carcinoma incidence**



Dashed lines represent the 95% confidence intervals (CIs) of the hazard ratio (HR). Multivariable model was adjusted for the same set of covariates as in Tables 2-5 and Supplementary Table 3.

For basal cell carcinoma incidence, no spline variable was selected and  $P = .90$  for linearity.

**Supplementary Figure 4.** Dose-response relationship between cumulative dose of personal permanent hair dye use and cutaneous squamous cell carcinoma incidence

**Cumulative dose of hair dye use and cutaneous squamous cell carcinoma incidence**



Dashed lines represent the 95% confidence intervals (CIs) of the hazard ratio (HR). Multivariable model was adjusted for the same set of covariates as in Tables 2-5 and Supplementary Table 4.

For cutaneous squamous cell carcinoma incidence, no spline variable was selected and  $P = .81$  for linearity.

**Supplementary Figure 5.** Dose-response relationship between cumulative dose of personal permanent hair dye use and melanoma incidence

**Cumulative dose of hair dye use and melanoma incidence**



Dashed lines represent the 95% confidence intervals (CIs) of the hazard ratio (HR). Multivariable model was adjusted for the same set of covariates as in Tables 2-5 and Supplementary Table 5.

For melanoma incidence, no spline variable was selected and  $P = .31$  for linearity.

**Supplementary Figure 6.** Dose-response relationship between cumulative dose of personal permanent hair dye use and overall breast cancer incidence

**Cumulative dose of hair dye use and breast cancer incidence**



Dashed lines represent the 95% confidence intervals (CIs) of the hazard ratio (HR). Multivariable model was adjusted for the same set of covariates as in Tables 2-5 and Supplementary Table 6.

For overall breast cancer incidence, no spline variable was selected and  $P = .09$  for linearity.

**Supplementary Figure 7.** Dose-response relationship between cumulative dose of personal permanent hair dye use and breast cancer (ER+) incidence

**Cumulative dose of hair dye use and breast cancer (ER+) incidence**



Dashed lines represent the 95% confidence intervals (CIs) of the hazard ratio (HR). Multivariable model was adjusted for the same set of covariates as in Tables 2-5 and Supplementary Table 7.

For breast cancer (ER+), no spline variable was selected and  $P = .47$  for linearity.

**Supplementary Figure 8.** Dose-response relationship between cumulative dose of personal permanent hair dye use and breast cancer (ER-) incidence

**Cumulative dose of hair dye use and breast cancer (ER-) incidence**



Dashed lines represent the 95% confidence intervals (CIs) of the hazard ratio (HR). Multivariable model was adjusted for the same set of covariates as in Tables 2-5 and Supplementary Table 8.

For breast cancer (ER-), no spline variable was selected and  $P = .41$  for linearity.

**Supplementary Figure 9.** Dose-response relationship between cumulative dose of personal permanent hair dye use and breast cancer (PR+) incidence

**Cumulative dose of hair dye use and breast cancer (PR+) incidence**



Dashed lines represent the 95% confidence intervals (CIs) of the hazard ratio (HR). Multivariable model was adjusted for the same set of covariates as in Tables 2-5 and Supplementary Table 9.

For breast cancer (PR+) incidence, no spline variable was selected and  $P = .23$  for linearity.

**Supplementary Figure 10.** Dose-response relationship between cumulative dose of personal permanent hair dye use and breast cancer (PR-) incidence

**Cumulative dose of hair dye use and breast cancer (PR-) incidence**



Dashed lines represent the 95% confidence intervals (CIs) of the hazard ratio (HR). Multivariable model was adjusted for the same set of covariates as in Tables 2-5 and Supplementary Table 10.

For breast cancer (PR-) incidence, no spline variable was selected and  $P = .67$  for linearity.

**Supplementary Figure 11.** Dose-response relationship between cumulative dose of personal permanent hair dye use and breast cancer (ER+/PR+) incidence

**Cumulative dose of hair dye use and breast cancer (ER+ /PR+ ) incidence**



Dashed lines represent the 95% confidence intervals (CIs) of the hazard ratio (HR). Multivariable model was adjusted for the same set of covariates as in Tables 2-5 and Supplementary Table 11.

For breast cancer (ER+/PR+) incidence, no spline variable was selected and  $P = .12$  for linearity.

**Supplementary Figure 12.** Dose-response relationship between cumulative dose of personal permanent hair dye use and breast cancer (ER+/PR-) incidence

**Cumulative dose of hair dye use and breast cancer (ER+ /PR-) incidence**



Dashed lines represent the 95% confidence intervals (CIs) of the hazard ratio (HR). Multivariable model was adjusted for the same set of covariates as in Tables 2-5 and Supplementary Table 12.

For breast cancer (ER+/PR-) incidence, no spline variable was selected and  $P = .33$  for linearity.

**Supplementary Figure 13.** Dose-response relationship between cumulative dose of personal permanent hair dye use and breast cancer (ER-/PR-) incidence

**Cumulative dose of hair dye use and breast cancer (ER-/PR-) incidence**



Dashed lines represent the 95% confidence intervals (CIs) of the hazard ratio (HR). Multivariable model was adjusted for the same set of covariates as in Tables 2-5 and Supplementary Table 13.

For breast cancer (ER-/PR-) incidence, no spline variable was selected and  $P = .14$  for linearity.

**Supplementary Figure 14.** Dose-response relationship between cumulative dose of personal permanent hair dye use and ovarian cancer incidence

**Cumulative dose of hair dye use and ovarian cancer incidence**



Dashed lines represent the 95% confidence intervals (CIs) of the hazard ratio (HR). Multivariable model was adjusted for the same set of covariates as in Tables 2-5 and Supplementary Table 14.

For ovarian cancer incidence, no spline variable was selected and  $P = .11$  for linearity.

**Supplementary Figure 15.** Dose-response relationship between cumulative dose of personal permanent hair dye use and colorectal cancer incidence

**Cumulative dose of hair dye use and colorectal cancer incidence**



Dashed lines represent the 95% confidence intervals (CIs) of the hazard ratio (HR). Multivariable model was adjusted for the same set of covariates as in Tables 2-5 and Supplementary Table 15.

For colorectal cancer incidence, no spline variable was selected and  $P = .85$  for linearity.

**Supplementary Figure 16.** Dose-response relationship between cumulative dose of personal permanent hair dye use and bladder cancer incidence

**Cumulative dose of hair dye use and bladder cancer incidence**



Dashed lines represent the 95% confidence intervals (CIs) of the hazard ratio (HR). Multivariable model was adjusted for the same set of covariates as in Tables 2-5 and Supplementary Table 16.

For bladder cancer incidence, no spline variable was selected and  $P = .79$  for linearity.

**Supplementary Figure 17.** Dose-response relationship between cumulative dose of personal permanent hair dye use and kidney cancer incidence

**Cumulative dose of hair dye use and kidney cancer incidence**



Dashed lines represent the 95% confidence intervals (CIs) of the hazard ratio (HR). Multivariable model was adjusted for the same set of covariates as in Tables 2-5 and Supplementary Table 17.

For kidney cancer incidence, no spline variable was selected and  $P = .80$  for linearity.

**Supplementary Figure 18.** Dose-response relationship between cumulative dose of personal permanent hair dye use and lung cancer incidence

**Cumulative dose of hair dye use and lung cancer incidence**



Dashed lines represent the 95% confidence intervals (CIs) of the hazard ratio (HR). Multivariable model was adjusted for the same set of covariates as in Tables 2-5 and Supplementary Table 18.

For lung cancer incidence, no spline variable was selected and  $P = .06$  for linearity.

**Supplementary Figure 19.** Dose-response relationship between cumulative dose of personal permanent hair dye use and brain cancer incidence

**Cumulative dose of hair dye use and brain cancer incidence**



Dashed lines represent the 95% confidence intervals (CIs) of the hazard ratio (HR). Multivariable model was adjusted for the same set of covariates as in Tables 2-5 and Supplementary Table 19.

For brain cancer incidence, no spline variable was selected and  $P = .98$  for linearity.

**Supplementary Figure 20.** Dose-response relationship between cumulative dose of personal permanent hair dye use and overall hematopoietic cancer incidence

**Cumulative dose of hair dye use and overall hematopoietic cancer incidence**



Dashed lines represent the 95% confidence intervals (CIs) of the hazard ratio (HR). Multivariable model was adjusted for the same set of covariates as in Tables 2-5 and Supplementary Table 20.

For overall hematopoietic cancer incidence, no spline variable was selected and  $P = .22$  for linearity.

**Supplementary Figure 21.** Dose-response relationship between cumulative dose of personal permanent hair dye use and overall non-Hodgkin lymphoma incidence

**Cumulative dose of hair dye use and overall non-Hodgkin lymphoma incidence**



Dashed lines represent the 95% confidence intervals (CIs) of the hazard ratio (HR). Multivariable model was adjusted for the same set of covariates as in Tables 2-5 and Supplementary Table 21.

For overall non-Hodgkin lymphoma incidence, no spline variable was selected and  $P = .78$  for linearity.

**Supplementary Figure 22.** Dose-response relationship between cumulative dose of personal permanent hair dye use and T-cell lymphoma incidence

**Cumulative dose of hair dye use and T-cell lymphoma incidence**



Dashed lines represent the 95% confidence intervals (CIs) of the hazard ratio (HR). Multivariable model was adjusted for the same set of covariates as in Tables 2-5 and Supplementary Table 22.

For T-cell lymphoma incidence, there was a nonlinear relationship with  $P = .04$  for nonlinearity and  $P = .10$  for the overall significance.

**Supplementary Figure 23.** Dose-response relationship between cumulative dose of personal permanent hair dye use and diffuse large B-cell lymphoma incidence

**Cumulative dose of hair dye use and diffuse large B-cell lymphoma incidence**



Dashed lines represent the 95% confidence intervals (CIs) of the hazard ratio (HR). Multivariable model was adjusted for the same set of covariates as in Tables 2-5 and Supplementary Table 23.

For diffuse large B-cell lymphoma incidence, no spline variable was selected and  $P = .41$  for linearity.

**Supplementary Figure 24.** Dose-response relationship between cumulative dose of personal permanent hair dye use and follicular lymphoma incidence

**Cumulative dose of hair dye use and follicular lymphoma incidence**



Dashed lines represent the 95% confidence intervals (CIs) of the hazard ratio (HR). Multivariable model was adjusted for the same set of covariates as in Tables 2-5 and Supplementary Table 24.

For follicular lymphoma incidence, no spline variable was selected and  $P = .27$  for linearity.

**Supplementary Figure 25.** Dose-response relationship between cumulative dose of personal permanent hair dye use and chronic lymphocytic leukemia/small lymphocytic lymphoma incidence



Dashed lines represent the 95% confidence intervals (CIs) of the hazard ratio (HR). Multivariable model was adjusted for the same set of covariates as in Tables 2-5 and Supplementary Table 25.

For chronic lymphocytic leukemia/small lymphocytic lymphoma incidence, no spline variable was selected and  $P = .63$  for linearity.

**Supplementary Figure 26.** Dose-response relationship between cumulative dose of personal permanent hair dye use and Hodgkin lymphoma incidence

**Cumulative dose of hair dye use and Hodgkin lymphoma incidence**



Dashed lines represent the 95% confidence intervals (CIs) of the hazard ratio (HR). Multivariable model was adjusted for the same set of covariates as in Tables 2-5 and Supplementary Table 26.

For Hodgkin lymphoma incidence, no spline variable was selected and  $P = .98$  for linearity.

**Supplementary Figure 27.** Dose-response relationship between cumulative dose of personal permanent hair dye use and multiple myeloma incidence

**Cumulative dose of hair dye use and multiple myeloma incidence**



Dashed lines represent the 95% confidence intervals (CIs) of the hazard ratio (HR). Multivariable model was adjusted for the same set of covariates as in Tables 2-5 and Supplementary Table 27.

For multiple myeloma incidence, no spline variable was selected and  $P = .16$  for linearity.

**Supplementary Figure 28.** Dose-response relationship between cumulative dose of personal permanent hair dye use and myeloid leukemia incidence

**Cumulative dose of hair dye use and myeloid leukemias incidence**



Dashed lines represent the 95% confidence intervals (CIs) of the hazard ratio (HR). Multivariable model was adjusted for the same set of covariates as in Tables 2-5 and Supplementary Table 28.

For myeloid leukemia incidence, no spline variable was selected and  $P = .57$  for linearity.

**Supplementary Figure 29.** Dose-response relationship between cumulative dose of personal permanent hair dye use and cancer-related death

**Cumulative dose of hair dye use and cancer-related death**



Dashed lines represent the 95% confidence intervals (CIs) of the hazard ratio (HR). Multivariable model was adjusted for the same set of covariates as in Tables 2-5 and Supplementary Table 29.

For cancer-related death, no spline variable was selected and  $P = .64$  for linearity.
